# Supplementary material for: A novel μ 3 -CO 3 bridged linear polymeric Cu-complex ([Cu 3 (DMAP) 8 (μ 3 -CO 3 ) 2 ]I 2 ) n · x H 2 O: synthesis, characterization and catalytic applications in the synthesis of phenoxypyrimidines and arylthiopyrimidines via C–O and C–S cross-coupling reactions
Source: Royal Society of Chemistry journal article supplement (doi:10.1039/d4ra00001c), 2024-01-01
Supplement: d4ra00001c1.pdf [file d4ra00001c1.pdf]

**[(Cu<sub>3</sub>(DMAP)<sub>8</sub>(μ<sub>3</sub>-CO<sub>3</sub>)<sub>2</sub>)]<sub>n</sub>·xH<sub>2</sub>O: Synthesis of a μ<sub>3</sub>-CO<sub>3</sub> bridged linear polymeric Cu-complex, characterization and catalytic applications in the synthesis of phenoxyrimidines and arylthiopyrimidines via C-O and C-S cross-coupling reactions**

Amar Jyoti Bhuyan,<sup>a</sup> Partha Pratim Nath,<sup>b,c</sup> Sourav Jyoti Bharali<sup>d</sup> and Lakhinath Saikia\*<sup>a</sup>

<sup>a</sup>*Department of Chemistry, Rajiv Gandhi University (A Central University), Rono-Hills, Doimukh-791112, India*

<sup>b</sup>*Department of Chemistry, North Eastern Regional Institute of Science & Technology, Nirjuli, Itanagar-791109, India*

<sup>c</sup>*Department of Chemistry, Indian Institute of Technology, Guwahati-781039, India*

<sup>d</sup>*Assam Energy Institute, Sivasagar-785697, India*

\*Corresponding author's e-mail: [lakhinath.saikia@rgu.ac.in](mailto:lakhinath.saikia@rgu.ac.in)

**Contents:**

- 1. Spectral data of synthesized compounds: Page no. S1-S7**
- 2. Spectra of synthesized compounds: Page no. S7-S44**
- 3. X-ray crystallographic information: Page no. S45-S50**
- 4. Retrieved data from SwissADME: Page no. S51-S57**

## 1. Spectral data of synthesized compounds

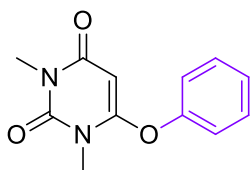

### 1,3-Dimethyl-6-phenoxy-pyrimidine-2,4(1H,3H)-dione (3a):

Creamy white solid (86 %); mp: 105 °C – 109 °C;  $R_f$  = 0.3 in EtOAc-Hexane (1:4);  $^1\text{H}$  NMR (400 MHz,  $\text{CDCl}_3$ ):  $\delta$  = 7.43 (t,  $J$  = 8 Hz, 2H), 7.31 (t,  $J$  = 7.4 Hz, 1H), 7.10 (d,  $J$  = 7.6 Hz, 2H), 4.77 (s, 1H), 3.52 (s, 3H), 3.30 (s, 3H) ppm;  $^{13}\text{C}\{^1\text{H}\}$  NMR (100 MHz,  $\text{CDCl}_3$ ):  $\delta$  = 163.3, 161.7, 151.6, 151.6, 130.6, 127.4, 121.3, 81.1, 29.6, 28.2 ppm; HRMS(ESI): calcd. for  $\text{C}_{12}\text{H}_{12}\text{N}_2\text{O}_3$   $[\text{M}+\text{H}]^+$  233.0926; found: 233.0923.

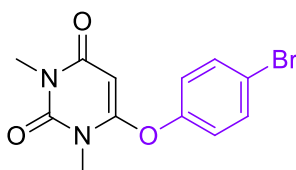

### 6-(4-bromophenoxy)-1,3-dimethylpyrimidine-2,4(1H,3H)-

**dione (3b):** White solid (94 %); mp: 150 °C – 151 °C;  $R_f$  = 0.3 in EtOAc-Hexane (1:4);  $^1\text{H}$  NMR (400 MHz,  $\text{DMSO}-d_6$ ):  $\delta$  = 7.73 (d,  $J$  = 8.8 Hz, 2H), 7.31 (d,  $J$  = 8.8 Hz, 2H), 4.53 (s, 1H), 3.39 (s, 3H), 3.14 (s, 3H) ppm;  $^{13}\text{C}\{^1\text{H}\}$  NMR (100 MHz,  $\text{DMSO}-d_6$ ):  $\delta$  = 161.8, 161.1, 150.9, 150.8, 133.4, 123.5, 119.3, 80.3, 29.2, 27.5 ppm; HRMS(ESI): calcd. for  $\text{C}_{12}\text{H}_{11}\text{BrN}_2\text{O}_3$   $[\text{M}+\text{H}]^+$  311.0031.

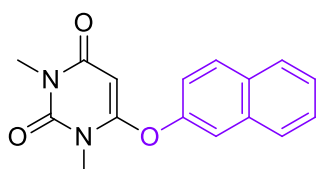

### 1,3-Dimethyl-6-(naphthalen-2-yloxy)pyrimidine-2,4(1H,3H)

**-dione (3c):** Light yellow solid (90 %); mp: 134 °C – 136 °C,  $R_f$  = 0.2 in EtOAc-Hexane (1:4);  $^1\text{H}$  NMR (400 MHz,  $\text{CDCl}_3$ ):  $\delta$  = 7.92 (d,  $J$  = 8.8 Hz, 1H), 7.88 (m, 2H), 7.81 (m, 3H), 7.22 (dd,  $J$  = 2.4 Hz, 8.8 Hz, 1H), 4.82 (s, 1H), 3.58 (s, 3H), 3.32 (s, 3H) ppm;  $^{13}\text{C}\{^1\text{H}\}$  NMR (100 MHz,  $\text{CDCl}_3$ ):  $\delta$  = 163.2, 161.7, 151.6, 149.1, 134.0, 132.0, 131.0, 128.2, 127.8, 127.6, 126.8, 120.0, 118.7, 81.5, 29.6, 28.2 ppm; HRMS(ESI): calcd. for  $\text{C}_{16}\text{H}_{14}\text{N}_2\text{O}_3$   $[\text{M}+\text{H}]^+$  283.1083; found: 283.1082.

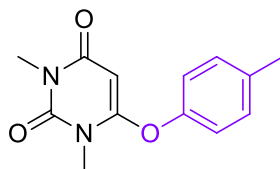

### 1,3-dimethyl-6-(p-tolyloxy)pyrimidine-2,4(1H,3H)-dione

**(3d):** Light red solid (88 %); mp: 106 °C – 108 °C;  $R_f$  = 0.3 in EtOAc-Hexane (1:4);  $^1\text{H}$  NMR (400 MHz,  $\text{CDCl}_3$ ):  $\delta$  = 7.21 (d,  $J$  = 8.4 Hz, 2H), 6.96 (d,  $J$  = 8.4 Hz, 2H), 4.76 (s, 1H), 3.51 (s, 3H), 3.29 (s, 3H), 2.35 (s, 3H) ppm;  $^{13}\text{C}\{^1\text{H}\}$  NMR (100 MHz,  $\text{CDCl}_3$ ):  $\delta$  = 163.3, 161.9, 151.6, 149.4, 137.3, 131.0, 121.0, 81.0, 29.5, 28.2, 21.1 ppm; HRMS(ESI): calcd. for  $\text{C}_{13}\text{H}_{14}\text{N}_2\text{O}_3$   $[\text{M}+\text{H}]^+$  247.1083; found: 247.1081.

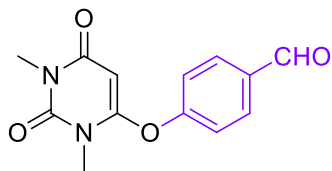

**4-((1,3-dimethyl-2,6-dioxo-1,2,3,6-tetrahydropyrimidin-4-yl)oxy)benzaldehyde (3e):** Brown solid (80%); mp: 113 °C – 114 °C;  $R_f = 0.2$  in EtOAc-Hexane (3:7);  $^1\text{H NMR}$  (400 MHz,  $\text{CDCl}_3$ ):  $\delta = 10.01(\text{s}, 1\text{H}), 8.00(\text{d}, J = 8.4 \text{ Hz}, 2\text{H}), 7.30(\text{d}, J = 8.4 \text{ Hz}, 2\text{H}), 4.82(\text{s}, 1\text{H}), 3.53(\text{s}, 3\text{H}), 3.31(\text{s}, 3\text{H})$  ppm;  $^{13}\text{C}\{^1\text{H}\}$  NMR (100 MHz,  $\text{CDCl}_3$ ):  $\delta = 190.5, 162.9, 160.7, 156.0, 151.4, 135.2, 132.3, 122.0, 82.0, 29.7, 28.3$  ppm; HRMS(ESI): calcd. for  $\text{C}_{13}\text{H}_{12}\text{N}_2\text{O}_4$   $[\text{M}+\text{H}]^+$  261.0875.

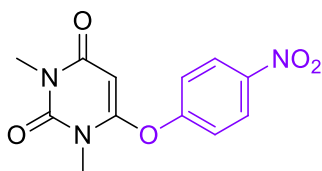

**1,3-dimethyl-6-(4-nitrophenoxy)pyrimidine-2,4(1H,3H)-dione (3f):** White solid (82 %); mp: 179 °C – 181 °C;  $R_f = 0.2$  in EtOAc-Hexane (3:7);  $^1\text{H NMR}$  (400 MHz,  $\text{CDCl}_3$ ):  $\delta = 8.35(\text{d}, J = 9.2 \text{ Hz}, 2\text{H}), 7.32(\text{d}, J = 8.8 \text{ Hz}, 2\text{H}), 4.81(\text{s}, 1\text{H}), 3.52(\text{s}, 3\text{H}), 3.30(\text{s}, 3\text{H})$  ppm;  $^{13}\text{C}\{^1\text{H}\}$  NMR (100 MHz,  $\text{CDCl}_3$ ):  $\delta = 162.6, 160.3, 156.2, 151.3, 146.3, 126.5, 122.1, 82.3, 29.8, 28.3$  ppm; HRMS(ESI): calcd. for  $\text{C}_{12}\text{H}_{11}\text{N}_3\text{O}_5$   $[\text{M}+\text{H}]^+$  278.0777; found: 278.0774.

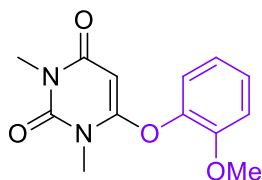

**6-(2-methoxyphenoxy)-1,3-dimethylpyrimidine-2,4(1H,3H)-dione (3g):** White solid (93 %); mp: 141 °C – 144 °C;  $R_f = 0.3$  in EtOAc-Hexane (3:7);  $^1\text{H NMR}$  (400 MHz,  $\text{DMSO}-d_6$ ):  $\delta = 7.39(\text{dt}, J = 1.65 \text{ \& } 8.2 \text{ Hz}, 1\text{H}), 7.30(\text{ddd}, J = 1.5 \text{ \& } 8.2\text{Hz}, 2\text{H}), 7.08(\text{dt}, J = 1.5 \text{ \& } 7.7 \text{ Hz}, 1\text{H}), 4.42(\text{s}, 1\text{H}), 3.81(\text{s}, 3\text{H}), 3.42(\text{s}, 3\text{H}), 3.13(\text{s}, 3\text{H})$  ppm;  $^{13}\text{C}\{^1\text{H}\}$  NMR (100 MHz,  $\text{DMSO}-d_6$ ):  $\delta = 161.8, 160.9, 150.7, 150.5, 139.6, 128.4, 122.6, 121.2, 113.8, 79.0, 56.0, 29.1, 27.5$  ppm; HRMS(ESI): calcd. for  $\text{C}_{13}\text{H}_{14}\text{N}_2\text{O}_4$   $[\text{M}+\text{H}]^+$  263.1032; found: 263.1028.

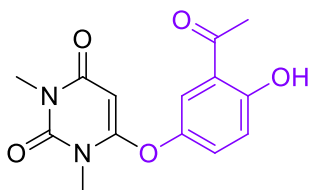

**6-(3-acetyl-4-hydroxyphenoxy)-1,3-dimethylpyrimidine-2,4(1H,3H)-dione (3h):** Light yellow solid (66 %); mp: 193 °C – 197 °C;  $R_f = 0.2$  in EtOAc-Hexane (3:7);  $^1\text{H NMR}$  (400 MHz,  $\text{CDCl}_3$ ):  $\delta = 12.5(\text{s}, 1\text{H}), 7.82(\text{d}, J = 8.8 \text{ Hz}, 1\text{H}), 6.71(\text{s}, 1\text{H}), 6.66(\text{d}, J = 7.2 \text{ Hz}, 1\text{H}), 4.91(\text{s}, 1\text{H}), 3.48(\text{s}, 3\text{H}), 3.30(\text{s}, 3\text{H}), 2.63(\text{s}, 3\text{H})$  ppm;  $^{13}\text{C}\{^1\text{H}\}$  NMR (100 MHz,  $\text{CDCl}_3$ ):  $\delta = 203.7, 164.6, 162.9, 160.2, 157.2, 151.4, 133.2, 118.6, 111.8, 110.7, 82.3, 29.7, 28.3, 27.0$  ppm; HRMS(ESI): calcd. for  $\text{C}_{14}\text{H}_{14}\text{N}_2\text{O}_5$   $[\text{M}+\text{H}]^+$  291.0981; found: 291.0978.

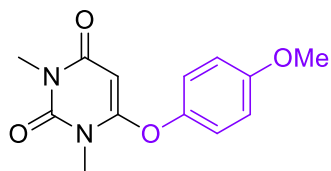

**6-(4-methoxyphenoxy)-1,3-dimethylpyrimidine-2,4(1H,3H)-dione (3i):** White solid (90 %); mp: 125 °C – 129 °C;  $R_f = 0.3$  in EtOAc-Hexane (3:7);  $^1\text{H}$  NMR (400 MHz, DMSO- $d_6$ ):  $\delta = 7.25$  (d,  $J = 8.8$  Hz, 2H), 7.07 (d,  $J = 9.2$  Hz, 2H), 4.42 (s, 1H), 3.79 (s, 3H), 3.40 (s, 3H), 3.13 (s, 3H) ppm;  $^{13}\text{C}\{^1\text{H}\}$  NMR (100 MHz, DMSO- $d_6$ ):  $\delta = 162.0$ , 161.9, 157.7, 150.8, 144.8, 122.3, 115.3, 79.5, 55.6, 29.1, 27.5 ppm; HRMS(ESI): calcd. for  $\text{C}_{13}\text{H}_{14}\text{N}_2\text{O}_4$   $[\text{M}+\text{H}]^+$  263.1032; found: 263.1027.

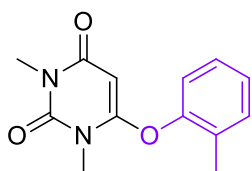

**1,3-dimethyl-6-(o-tolyloxy)pyrimidine-2,4(1H,3H)-dione (3j):** White solid (85 %); mp: 112 °C – 114 °C;  $R_f = 0.4$  in EtOAc-Hexane (3:7);  $^1\text{H}$  NMR (400 MHz,  $\text{CDCl}_3$ ):  $\delta = 7.28$  (m, 3H), 7.01 (dd,  $J = 2$  & 7.4 Hz, 1H), 4.67 (s, 1H), 3.54 (s, 3H), 3.30 (s, 3H), 2.16 (s, 3H) ppm;  $^{13}\text{C}\{^1\text{H}\}$  NMR (100 MHz,  $\text{CDCl}_3$ ):  $\delta = 163.3$ , 160.8, 151.6, 149.9, 132.3, 130.2, 128.1, 127.5, 121.5, 80.5, 29.4, 28.2, 15.9 ppm; HRMS(ESI): calcd. for  $\text{C}_{13}\text{H}_{14}\text{N}_2\text{O}_3$   $[\text{M}+\text{H}]^+$  247.1083; found: 247.1080.

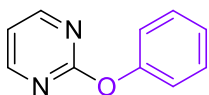

**2-Phenoxy pyrimidine (3k):** White solid (84 %); mp: 87 °C – 89 °C;  $R_f = 0.5$  in EtOAc-Hexane (3:7);  $^1\text{H}$  NMR (400 MHz,  $\text{CDCl}_3$ ):  $\delta = 8.59$  (d,  $J = 4.8$  Hz, 2H), 7.46 (t,  $J = 8$  Hz, 2H), 7.29 (t,  $J = 7.6$  Hz, 1H), 7.24 (d,  $J = 7.6$  Hz, 2H), 7.06 (t,  $J = 4.8$  Hz, 1H) ppm;  $^{13}\text{C}\{^1\text{H}\}$  NMR (100 MHz,  $\text{CDCl}_3$ ):  $\delta = 165.5$ , 159.9, 153.0, 129.9, 125.7, 121.8, 116.3 ppm; HRMS(ESI): calcd. for  $\text{C}_{10}\text{H}_8\text{N}_2\text{O}$   $[\text{M}+\text{H}]^+$  173.0715.

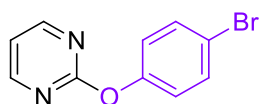

**2-(4-Bromophenoxy)pyrimidine (3l):** Brown solid (82 %); mp: 110 °C – 113 °C;  $R_f = 0.5$  in EtOAc-Hexane (3:7);  $^1\text{H}$  NMR (400 MHz,  $\text{CDCl}_3$ ):  $\delta = 8.55$  (d,  $J = 4.8$  Hz, 2H), 7.53 (d,  $J = 8.8$  Hz, 2H), 7.09 (d,  $J = 8.8$  Hz, 2H), 7.04 (t,  $J = 4.8$  Hz, 1H) ppm;  $^{13}\text{C}\{^1\text{H}\}$  NMR (100 MHz,  $\text{CDCl}_3$ ):  $\delta = 165.2$ , 160.0, 152.0, 132.9, 123.7, 118.8, 116.7 ppm; HRMS(ESI): calcd. for  $\text{C}_{10}\text{H}_7\text{BrN}_2\text{O}$   $[\text{M}+\text{H}]^+$  250.9820.

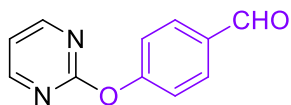

**4-(pyrimidin-2-yloxy)benzaldehyde (3m):** Yellow solid (60 %); mp: 81 °C – 82 °C;  $R_f = 0.3$  in EtOAc-Hexane (3:7);  $^1\text{H}$  NMR (400 MHz,  $\text{CDCl}_3$ ):  $\delta = 9.99$  (s, 1H), 8.58 (d,  $J = 4.8$  Hz, 2H), 7.96 (d,  $J = 8.8$  Hz, 2H), 7.36 (d,  $J = 8.4$  Hz, 2H), 7.09 (t,  $J = 4.8$  Hz, 1H) ppm;  $^{13}\text{C}\{^1\text{H}\}$  NMR (100 MHz,  $\text{CDCl}_3$ ):  $\delta = 191.1$ , 164.8, 160.1, 157.9, 133.8, 131.7, 122.4, 117.1 ppm; HRMS(ESI): calcd. for  $\text{C}_{11}\text{H}_8\text{N}_2\text{O}_2$   $[\text{M}+\text{H}]^+$  201.0664.

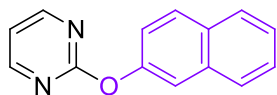

**2-(naphthalen-2-yloxy)pyrimidine (3n):** Creamy White solid (84 %); mp: 86 °C – 89 °C;  $R_f = 0.5$  in EtOAc-Hexane (3:7);  $^1\text{H NMR}$  (400 MHz,  $\text{CDCl}_3$ ):  $\delta = 8.54$  (d,  $J = 4.4$  Hz, 2H), 7.90 (d,  $J = 9.2$  Hz, 1H), 7.86 (d,  $J = 7.2$  Hz, 1H), 7.81 (d,  $J = 7.2$  Hz, 1H), 7.64 (s, 1H), 7.46 (m, 2H), 7.34 (dd,  $J = 2.4$  Hz & 6.4 Hz, 1H), 7.01 (t,  $J = 4.6$  Hz, 1H) ppm;  $^{13}\text{C}\{^1\text{H}\}$  NMR (100 MHz,  $\text{CDCl}_3$ ):  $\delta = 165.7, 159.9, 150.6, 134.3, 131.6, 129.8, 128.0, 127.8, 126.7, 125.8, 121.7, 118.5, 116.4$  ppm; HRMS(ESI): calcd. for  $\text{C}_{14}\text{H}_{10}\text{N}_2\text{O}$   $[\text{M}+\text{H}]^+$  223.0871; found: 223.0869.

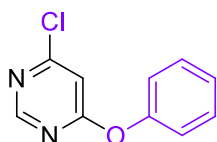

**4-chloro-6-phenoxy pyrimidine (3o):** White solid (88 %); mp: 38 °C – 39.5 °C;  $R_f = 0.7$  in EtOAc-Hexane (1:4);  $^1\text{H NMR}$  (400 MHz,  $\text{DMSO}-d_6$ ):  $\delta = 8.65$  (s, 1H), 7.48 (t,  $J = 8$  Hz, 2H), 7.38 (s, 1H), 7.32 (t,  $J = 7.4$  Hz, 1H), 7.26 (d,  $J = 8.8$  Hz, 2H) ppm;  $^{13}\text{C}\{^1\text{H}\}$  NMR (100 MHz,  $\text{DMSO}-d_6$ ):  $\delta = 169.9, 160.9, 158.6, 151.9, 129.9, 126.0, 121.6, 108.1$  ppm; HRMS(ESI): calcd. for  $\text{C}_{10}\text{H}_7\text{ClN}_2\text{O}$   $[\text{M}+\text{H}]^+$  207.0325; found: 207.0320.

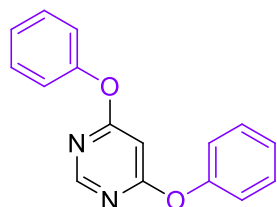

**4,6-diphenoxy pyrimidine (3p):** White solid (86 %); mp: 107 °C – 109 °C;  $R_f = 0.5$  in EtOAc-Hexane (1:4);  $^1\text{H NMR}$  (400 MHz,  $\text{DMSO}-d_6$ ):  $\delta = 8.41$  (s, 1H), 7.46 (t,  $J = 8$  Hz, 4H), 7.29 (t,  $J = 7.6$  Hz, 2H), 7.22 (d,  $J = 8$  Hz, 4H), 6.50 (s, 1H) ppm;  $^{13}\text{C}\{^1\text{H}\}$  NMR (100 MHz,  $\text{DMSO}-d_6$ ):  $\delta = 171.0, 158.1, 152.3, 129.9, 125.7, 121.5, 92.1$  ppm; HRMS(ESI): calcd. for  $\text{C}_{16}\text{H}_{12}\text{N}_2\text{O}_2$   $[\text{M}+\text{H}]^+$  265.0977; found: 265.0974.

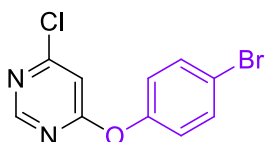

**4-(4-bromophenoxy)-6-chloro pyrimidine (3q):** White solid (86 %); mp: 59 °C – 61 °C;  $R_f = 0.7$  in EtOAc-Hexane (1:4);  $^1\text{H NMR}$  (400 MHz,  $\text{CDCl}_3$ ):  $\delta = 8.56$  (s, 1H), 7.55 (d,  $J = 8.8$  Hz, 2H), 7.03 (d,  $J = 9.2$  Hz, 2H), 6.94 (s, 1H) ppm;  $^{13}\text{C}\{^1\text{H}\}$  NMR (100 MHz,  $\text{CDCl}_3$ ):  $\delta = 170.1, 162.3, 158.7, 151.1, 133.2, 123.5, 119.6, 108.3$  ppm; HRMS(ESI): calcd. for  $\text{C}_{10}\text{H}_6\text{BrClN}_2\text{O}$   $[\text{M}+\text{H}]^+$  284.9430.

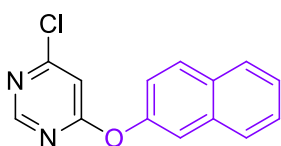

**4-chloro-6-(naphthalen-2-yloxy) pyrimidine (3r):** Creamy White solid (92 %); mp: 113 °C – 114 °C;  $R_f = 0.7$  in EtOAc-Hexane (1:4);  $^1\text{H NMR}$  (400 MHz,  $\text{CDCl}_3$ ):  $\delta = 8.58$  (s, 1H), 7.93 (d,  $J = 8.8$  Hz, 1H), 7.88 (d,  $J = 9.2$  Hz, 1H), 7.82 (d,  $J =$

6.8 Hz, 1H), 7.59 (s, 1H), 7.50 (m, 2H), 7.27 (dd,  $J = 2.2$  Hz & 6.4 Hz, 1H), 6.94 (s, 1H) ppm;  $^{13}\text{C}\{^1\text{H}\}$  NMR (100 MHz,  $\text{CDCl}_3$ ):  $\delta = 170.7, 162.2, 158.8, 149.7, 134.1, 131.8, 130.3, 128.1, 127.9, 127.1, 126.3, 120.9, 118.6, 108.1$  ppm; HRMS(ESI): calcd. for  $\text{C}_{14}\text{H}_9\text{ClN}_2\text{O}$   $[\text{M}+\text{H}]^+$  257.0482; found: 257.0480.

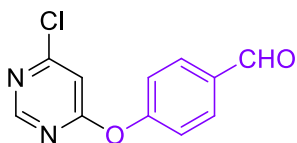

**4-((6-chloropyrimidin-4-yl)oxy)benzaldehyde (3s):** White solid (74 %); mp: 113 °C – 115 °C;  $R_f = 0.4$  in EtOAc-Hexane (1:4);  $^1\text{H}$  NMR (400 MHz,  $\text{CDCl}_3$ ):  $\delta = 10.01$  (s, 1H), 8.57 (s, 1H), 7.98 (d,  $J = 8.8$  Hz, 2H), 7.32 (d,  $J = 10.8$  Hz, 2H), 7.01 (s,

1H) ppm;  $^{13}\text{C}\{^1\text{H}\}$  NMR (100 MHz,  $\text{CDCl}_3$ ):  $\delta = 190.9, 169.6, 162.6, 158.6, 156.8, 134.4, 131.8, 122.4, 108.7$  ppm; HRMS(ESI): calcd. for  $\text{C}_{11}\text{H}_7\text{ClN}_2\text{O}_2$   $[\text{M}+\text{H}]^+$  235.0274; found: 235.0272.

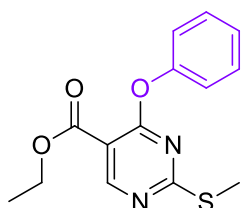

**Ethyl 2-(methylthio)-4-phenoxy pyrimidine-5-carboxylate (3t):** White solid (80 %); mp: 72 °C – 75 °C;  $R_f = 0.6$  in EtOAc-Hexane (1:4);  $^1\text{H}$  NMR (400 MHz,  $\text{DMSO}-d_6$ ):  $\delta = 8.91$  (s, 1H), 7.47 (t,  $J = 8$  Hz, 2H), 7.30 (t,  $J = 7.4$  Hz, 1H), 7.25 (d,  $J = 7.6$  Hz, 2H), 4.35 (q,  $J = 7.0$  Hz, 2H), 2.26 (s, 3H), 1.31 (t,  $J = 7.0$

Hz, 3H) ppm;  $^{13}\text{C}\{^1\text{H}\}$  NMR (100 MHz,  $\text{DMSO}-d_6$ ):  $\delta = 175.2, 165.8, 162.5, 160.9, 151.8, 129.6, 125.8, 121.8, 107.5, 61.0, 14.1, 13.5$  ppm; HRMS(ESI): calcd. for  $\text{C}_{14}\text{H}_{14}\text{N}_2\text{O}_3\text{S}$   $[\text{M}+\text{H}]^+$  291.0803.

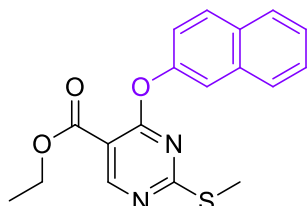

**Ethyl 2-(methylthio)-4-(naphthalen-2-yloxy)pyrimidine-5-carboxylate (3u):** Light Brown solid (84 %); mp: 78 °C – 80 °C;  $R_f = 0.5$  in EtOAc-Hexane (1:4);  $^1\text{H}$  NMR (400 MHz,  $\text{CDCl}_3$ ):  $\delta = 8.94$  (s, 1H), 7.87 (d,  $J = 8.8$  Hz, 2H), 7.80 (d,  $J = 6.8$  Hz, 1H), 7.61 (s, 1H), 7.48 (m, 2H), 7.31 (dd,  $J = 2.4$  Hz & 6.4 Hz, 1H), 4.44 (q,  $J = 7.0$  Hz, 2H), 2.16 (s, 3H), 1.40 (t,  $J = 7.2$  Hz, 3H) ppm;  $^{13}\text{C}\{^1\text{H}\}$

NMR (100 MHz,  $\text{CDCl}_3$ ):  $\delta = 176.6, 166.8, 163.4, 161.3, 149.9, 134.0, 131.6, 129.3, 128.0, 127.8, 126.8, 125.9, 121.9, 118.8, 107.6, 61.7, 14.5, 14.3$  ppm; HRMS(ESI): calcd. for  $\text{C}_{18}\text{H}_{16}\text{N}_2\text{O}_3\text{S}$   $[\text{M}+\text{H}]^+$  341.0960; found: 341.0958.

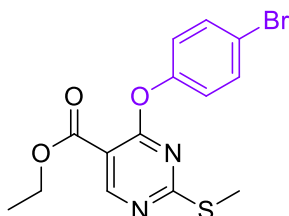

**Ethyl 4-(4-bromophenoxy)-2-(methylthio)pyrimidine-5-carboxylate (3v):** White solid (76 %); mp: 114 °C – 116 °C;  $R_f = 0.6$  in EtOAc-Hexane (1:4);  $^1\text{H}$  NMR (400 MHz,  $\text{CDCl}_3$ ):  $\delta = 8.90$  (s, 1H), 7.51 (d,  $J = 8.8$  Hz, 2H), 7.05 (d,  $J = 8.8$  Hz, 2H), 4.40 (q,  $J = 7.0$  Hz, 2H), 2.26 (s, 3H), 1.37 (t,  $J = 7.0$  Hz, 3H)

ppm;  $^{13}\text{C}\{^1\text{H}\}$  NMR (100 MHz,  $\text{CDCl}_3$ ):  $\delta = 176.6, 166.3, 163.2, 161.3, 151.3, 132.6, 124.0, 119.0, 107.6, 61.6, 14.4, 14.4$  ppm; HRMS(ESI): calcd. for  $\text{C}_{14}\text{H}_{13}\text{BrN}_2\text{O}_3\text{S}$   $[\text{M}+\text{H}]^+$  368.9909.

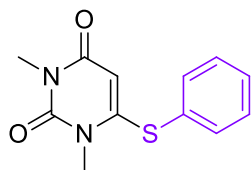

**1,3-dimethyl-6-(phenylthio)pyrimidine-2,4(1H,3H)-dione**

**(3w):** White solid (94 %); mp: 132 °C – 134 °C;  $R_f = 0.2$  in EtOAc-Hexane (1:4);  $^1\text{H}$  NMR (400 MHz,  $\text{DMSO}-d_6$ ):  $\delta = 7.65$  (m, 5H), 4.73 (s, 1H), 3.45 (s, 3H), 3.11 (s, 3H) ppm;  $^{13}\text{C}\{^1\text{H}\}$  NMR (100 MHz,  $\text{DMSO}-d_6$ ):  $\delta = 159.9, 157.2, 151.1, 135.5, 131.1, 130.6, 126.4, 96.5, 32.2, 27.5$  ppm; HRMS(ESI): calcd. for  $\text{C}_{12}\text{H}_{12}\text{N}_2\text{O}_2\text{S}$   $[\text{M}+\text{H}]^+$  249.0698; found: 249.0694.

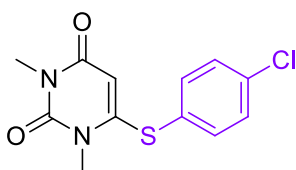

**6-((4-chlorophenyl)thio)-1,3-dimethylpyrimidine-2,4(1H,3H)-dione (3x):**

White solid (81 %); mp: 164 °C – 166 °C;  $R_f = 0.3$  in EtOAc-Hexane (1:4);  $^1\text{H}$  NMR (400 MHz,  $\text{CDCl}_3$ ):  $\delta = 7.45$  (s, 4H), 4.96 (s, 1H), 3.54 (s, 3H), 3.27 (s, 3H) ppm;  $^{13}\text{C}\{^1\text{H}\}$  NMR (100 MHz,  $\text{CDCl}_3$ ):  $\delta = 161.2, 157.4, 151.9, 138.3, 137.5, 131.1, 124.6, 97.7, 32.5, 28.2$  ppm; HRMS(ESI): calcd. for  $\text{C}_{12}\text{H}_{11}\text{ClN}_2\text{O}_2\text{S}$   $[\text{M}+\text{H}]^+$  283.0308; found: 283.0307.

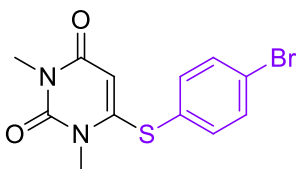

**6-((4-bromophenyl)thio)-1,3-dimethylpyrimidine-2,4(1H,3H)-dione (3y):**

White solid (87 %); mp: 172 °C – 173 °C;  $R_f = 0.3$  in EtOAc-Hexane (1:4);  $^1\text{H}$  NMR (400 MHz,  $\text{CDCl}_3$ ):  $\delta = 7.61$  (d,  $J = 8.4$  Hz, 2H), 7.38 (d,  $J = 8.4$  Hz, 2H), 4.97 (s, 1H), 3.54 (s, 3H), 3.27 (s, 3H) ppm;  $^{13}\text{C}\{^1\text{H}\}$  NMR (100 MHz,  $\text{CDCl}_3$ ):  $\delta = 161.2, 157.3, 151.9, 137.6, 134.0, 126.6, 125.2, 97.8, 32.5, 28.2$  ppm; HRMS(ESI): calcd. for  $\text{C}_{12}\text{H}_{11}\text{BrN}_2\text{O}_2\text{S}$   $[\text{M}+\text{H}]^+$  326.9803; found: 326.9800.

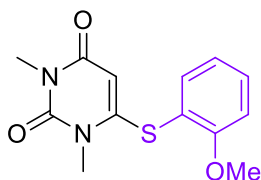

**6-((2-methoxyphenyl)thio)-1,3-dimethylpyrimidine-2,4(1H,3H)-dione (3z):**

White solid (90 %); mp: 184 °C – 187 °C;  $R_f = 0.2$  in EtOAc-Hexane (1:4);  $^1\text{H}$  NMR (400 MHz,  $\text{CDCl}_3$ ):  $\delta = 7.52$  (m, 2H), 7.03 (m, 2H), 4.97 (s, 1H), 3.84 (s, 3H), 3.58 (s, 3H), 3.27 (s, 3H) ppm;  $^{13}\text{C}\{^1\text{H}\}$  NMR (100 MHz,  $\text{CDCl}_3$ ):  $\delta = 161.5, 160.2, 157.0, 152.1, 138.2, 133.8, 122.2, 113.6, 112.4, 96.6, 56.3, 32.4, 28.1$  ppm; HRMS(ESI): calcd. for  $\text{C}_{13}\text{H}_{14}\text{N}_2\text{O}_3\text{S}$   $[\text{M}+\text{H}]^+$  279.0803; found: 279.0801.

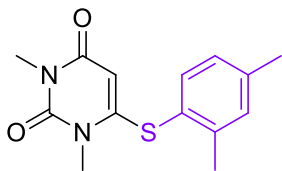

**6-((2,4-dimethylphenyl)thio)-1,3-dimethylpyrimidine-2,4(**

**1H,3H)-dione (3aa):** White solid (84 %); mp: 114 °C – 117 °C;

$R_f = 0.6$  in EtOAc-Hexane (3:7);  $^1\text{H NMR}$  (400 MHz,  $\text{CDCl}_3$ ):

$\delta = 7.36$  (d,  $J = 8$  Hz, 1H), 7.17 (s, 1H), 7.08 (d,  $J = 8.4$  Hz, 1H),

4.84 (s, 1H), 3.57 (s, 3H), 3.27 (s, 3H), 2.35 (s, 6H) ppm;  $^{13}\text{C}\{^1\text{H NMR}$  (100 MHz,  $\text{CDCl}_3$ ):

$\delta = 161.4, 157.6, 152.1, 143.3, 142.7, 137.4, 132.9, 129.0, 121.8, 96.0, 32.3, 28.1, 21.5, 20.6$

ppm; HRMS(ESI): calcd. for  $\text{C}_{14}\text{H}_{16}\text{N}_2\text{O}_2\text{S}$   $[\text{M}+\text{H}]^+$  277.1011.

**6-((4-aminophenyl)thio)-1,3-dimethylpyrimidine-2,4(1H,**

**3H)-dione (3ab):** Yellow solid (76 %); mp: 196 °C – 199°C;  $R_f$

$= 0.2$  in EtOAc-Hexane (3:7);  $^1\text{H NMR}$  (400 MHz,  $\text{CDCl}_3$ ):  $\delta =$

7.24 (d,  $J = 8.8$  Hz, 2H), 6.69 (d,  $J = 8.8$  Hz, 2H), 5.00 (s, 1H),

4.04 (s, 2H), 3.53 (s, 3H), 3.27 (s, 3H) ppm;  $^{13}\text{C}\{^1\text{H}\}$  NMR (100 MHz,  $\text{CDCl}_3$ ):  $\delta = 161.5,$

160.2, 152.1, 149.6, 137.9, 116.4, 112.1, 96.5, 32.2, 28.1 ppm; HRMS(ESI): calcd. for

$\text{C}_{12}\text{H}_{13}\text{N}_3\text{O}_2\text{S}$   $[\text{M}+\text{H}]^+$  264.0807; found: 264.0808.

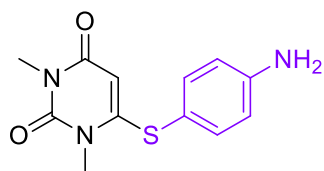

**2. Representative spectra of synthesized compounds**

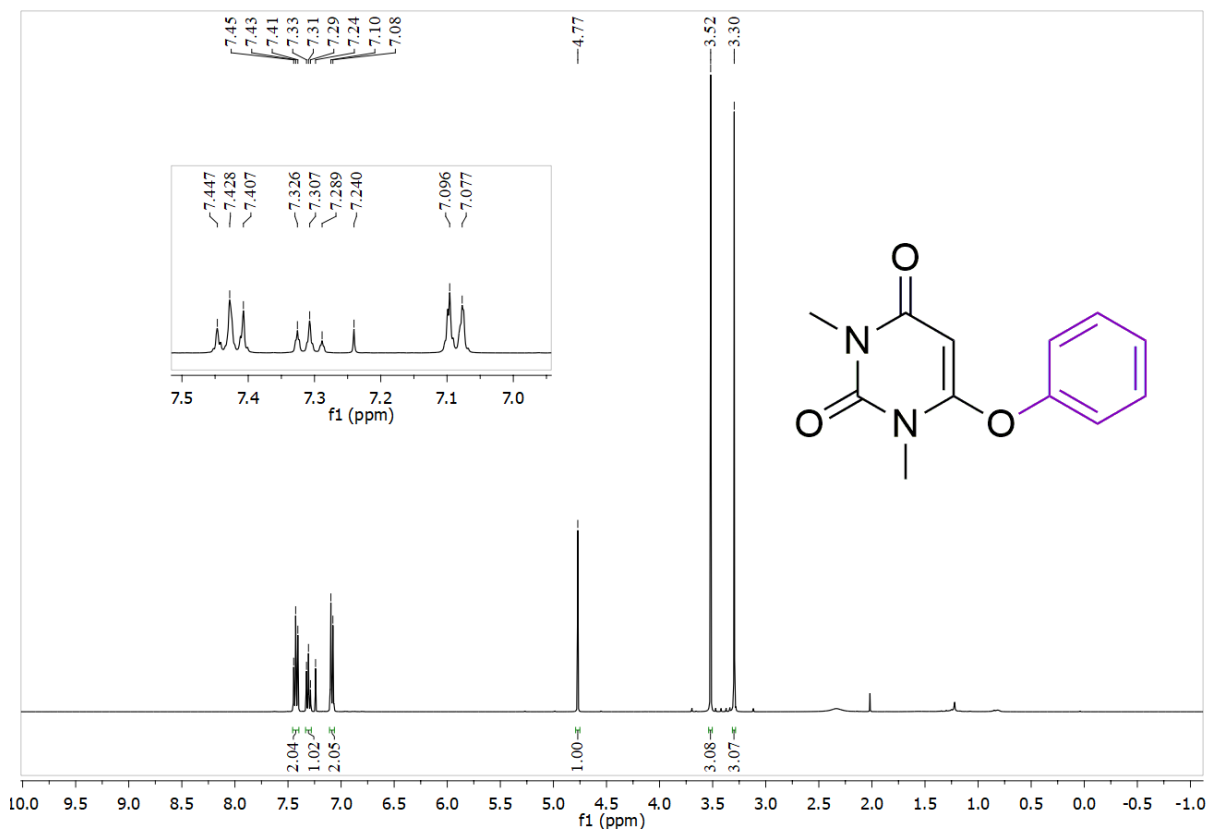

**Fig. S1:**  $^1\text{H NMR}$  (400 MHz) spectra of **3a**



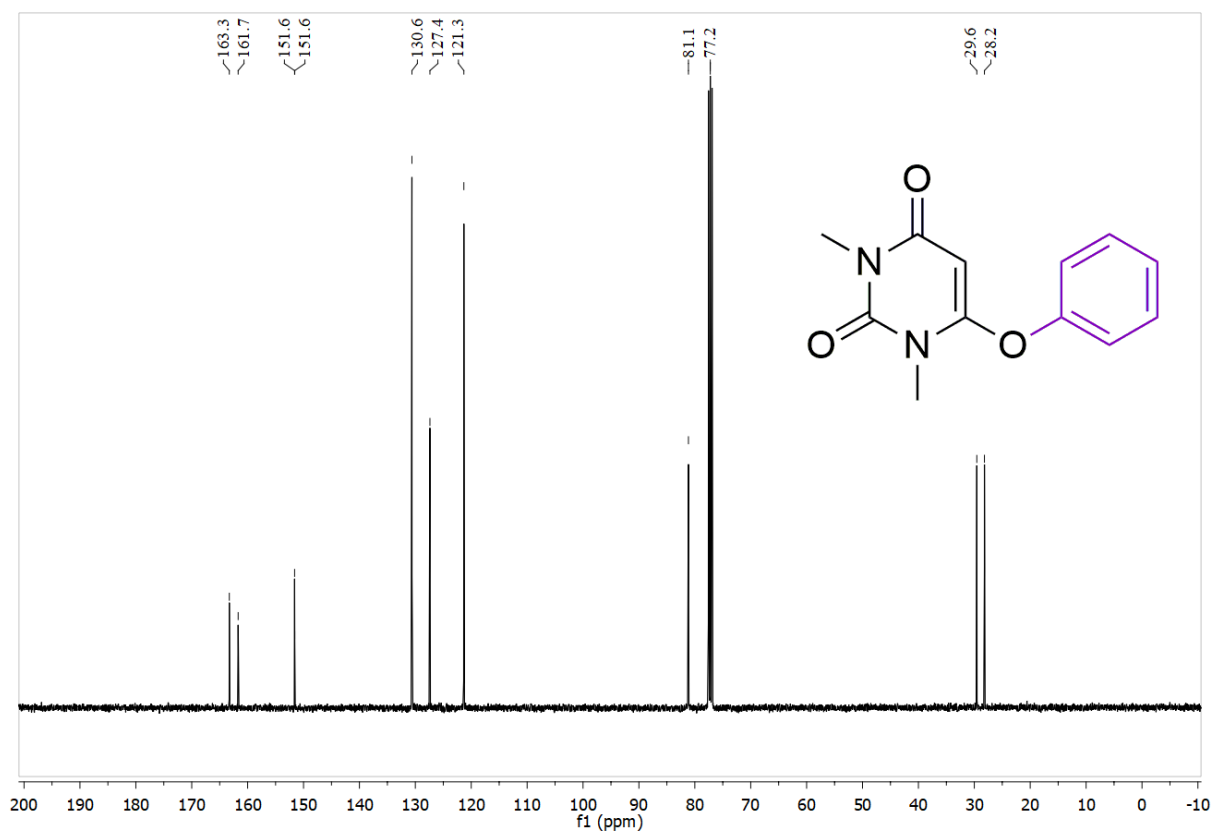

Fig. S2:  $^{13}\text{C}\{^1\text{H}\}$  NMR (100 MHz) spectra of **3a**

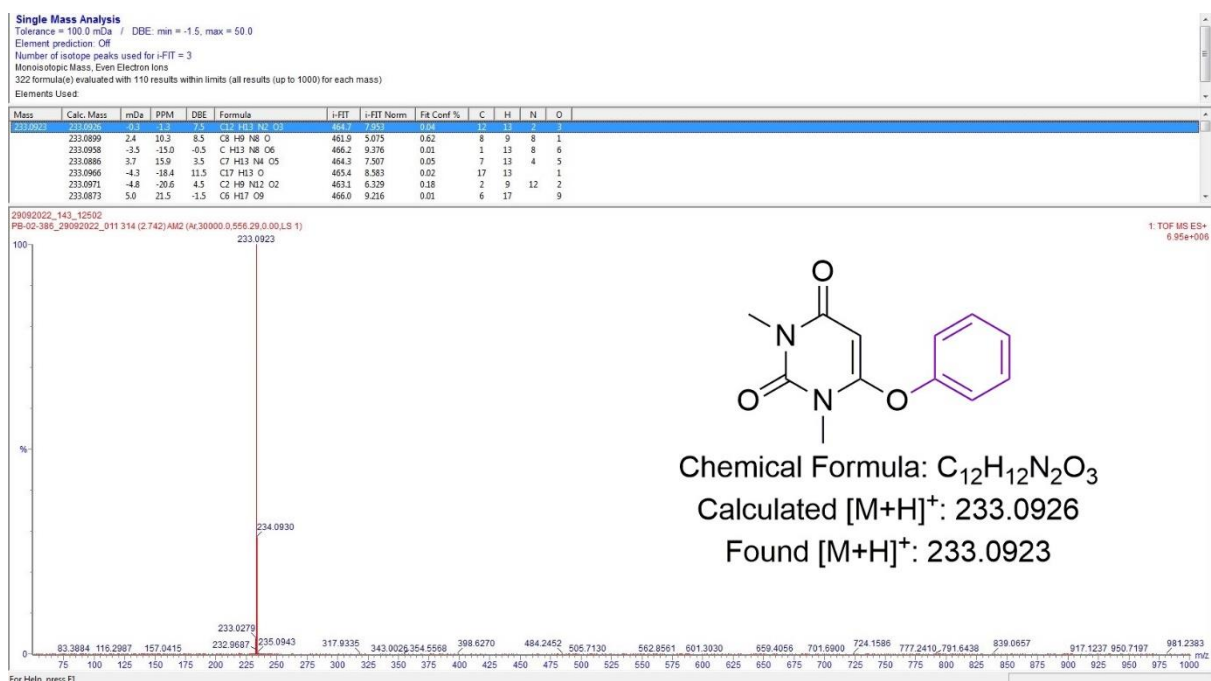

Fig. S3: HRMS spectrum of **3a**

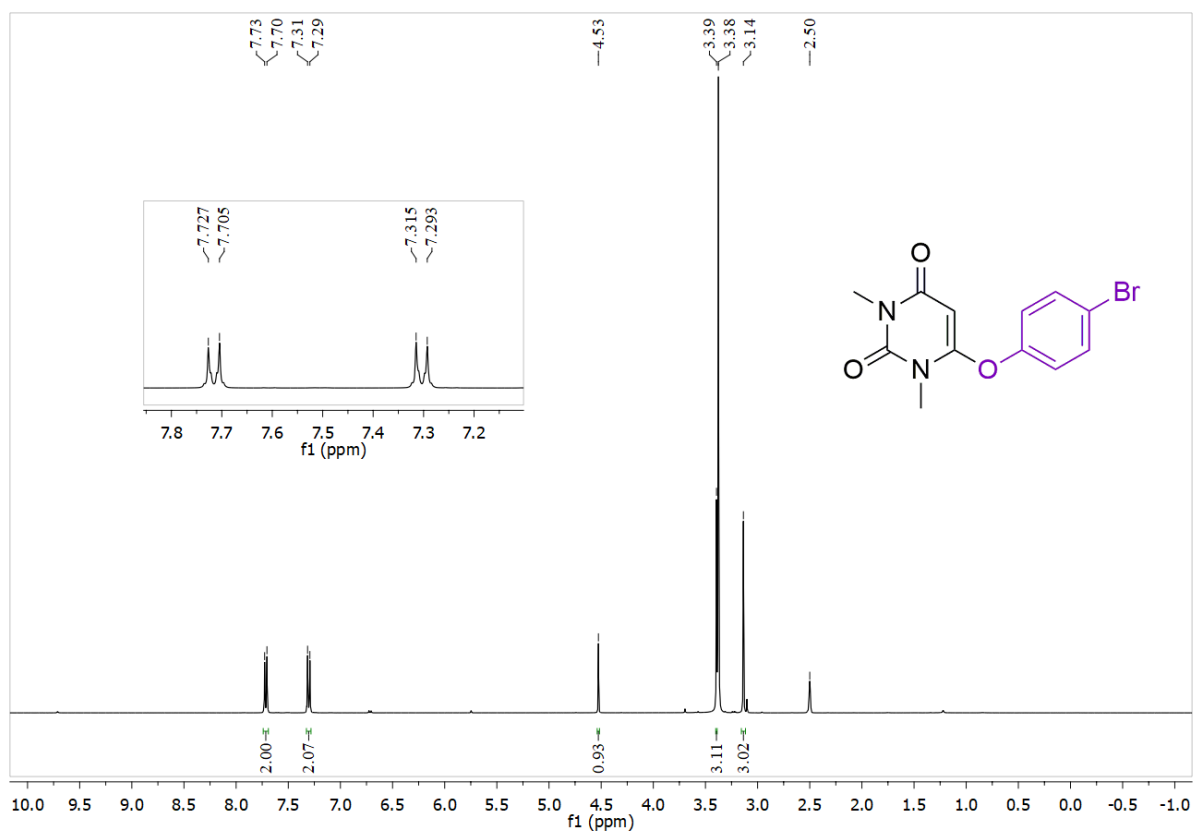

**Fig. S4:**  $^1\text{H}$  NMR (400 MHz) spectra of **3b**

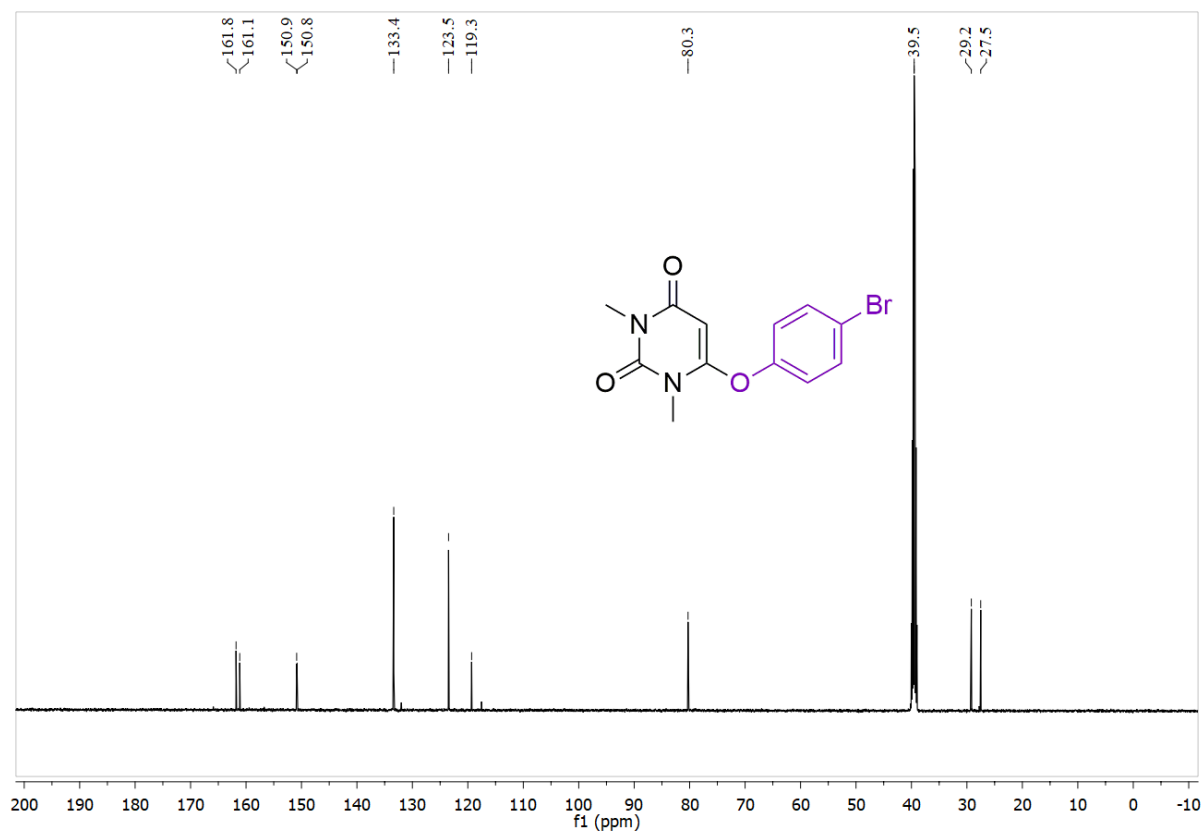

**Fig. S5:**  $^{13}\text{C}\{^1\text{H}\}$  NMR (100 MHz) spectra of **3b**

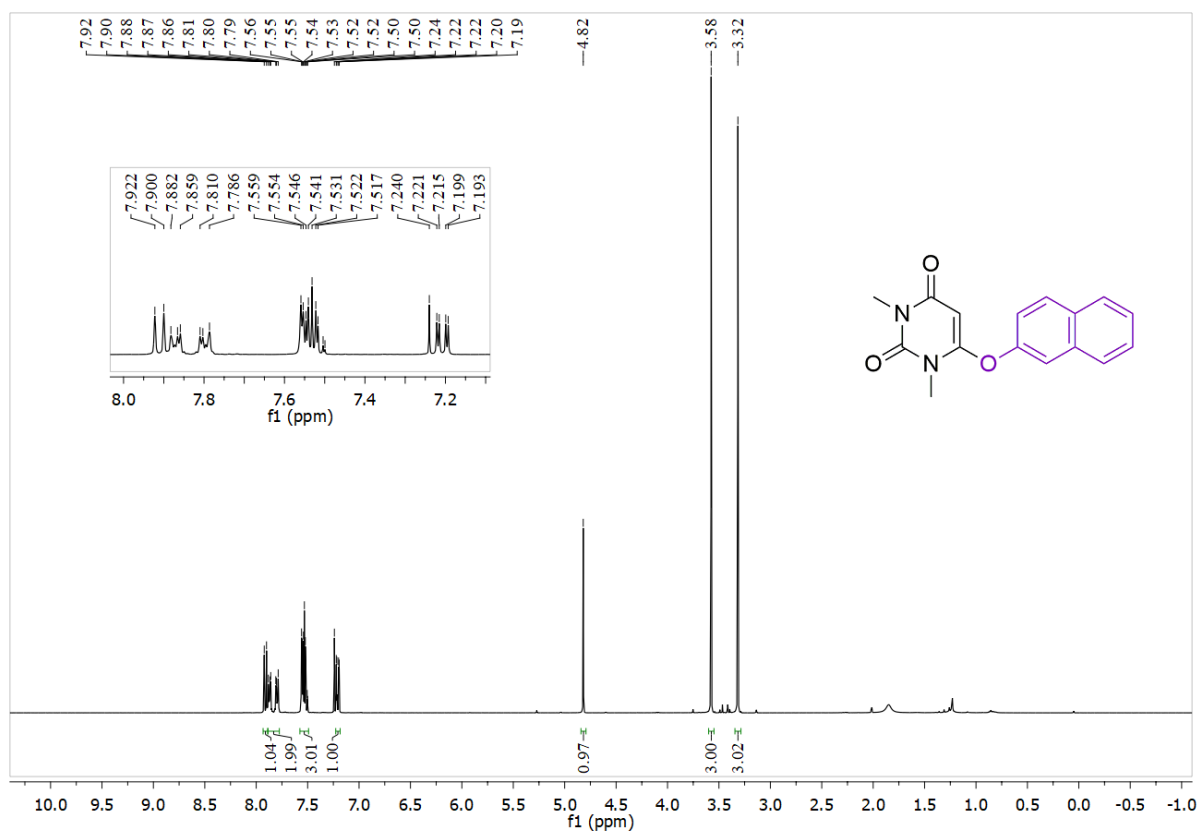

**Fig. S6:** <sup>1</sup>H NMR (400 MHz) spectra of **3c**

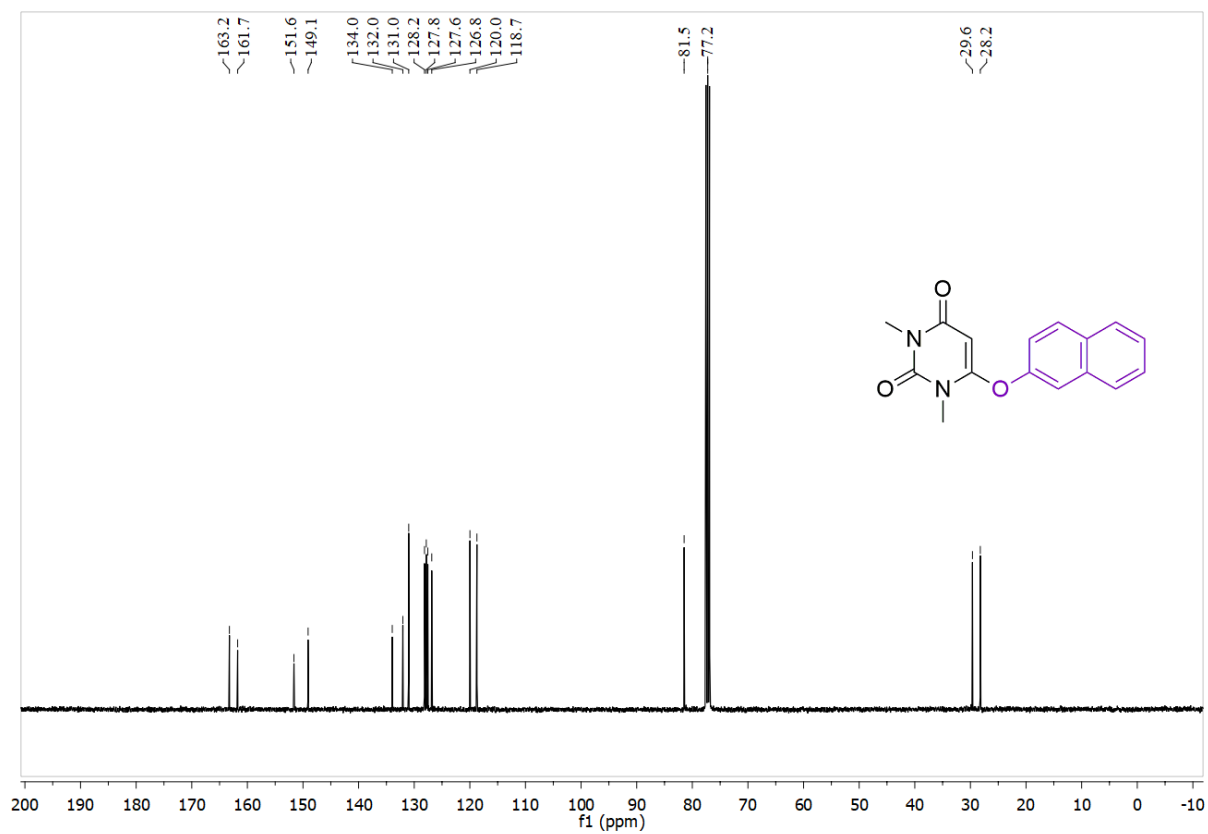

**Fig. S7:** <sup>13</sup>C{<sup>1</sup>H} NMR (100 MHz) spectra of **3c**

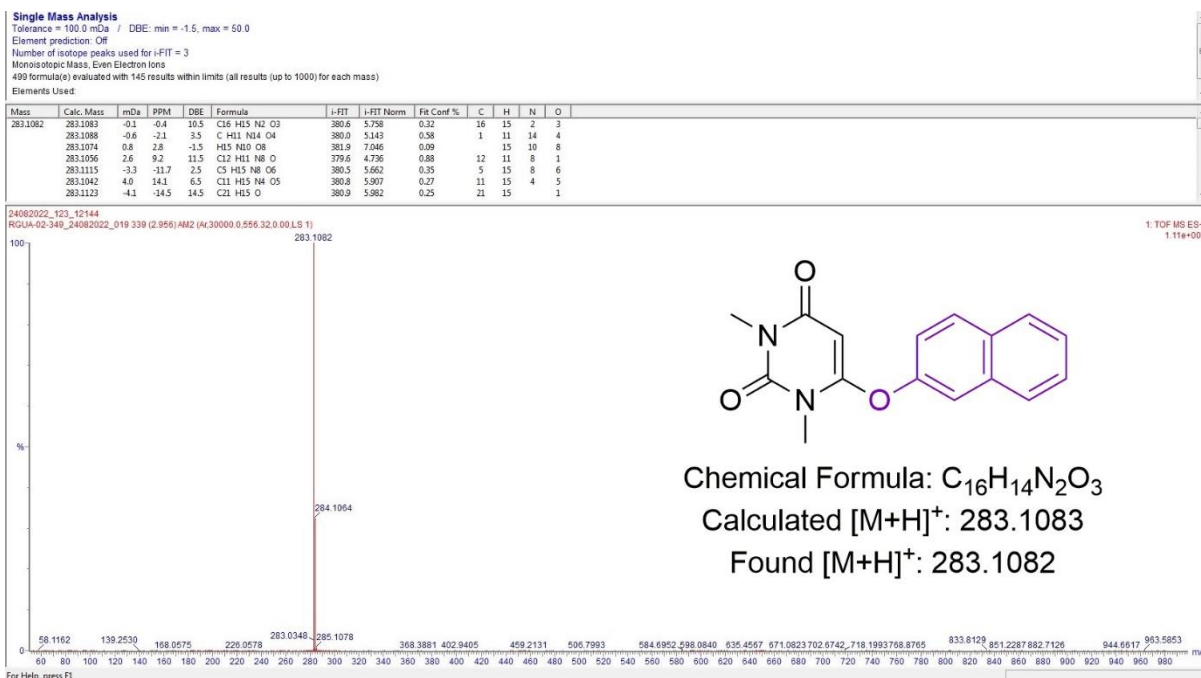

**Fig. S8:** HRMS spectrum of **3c**

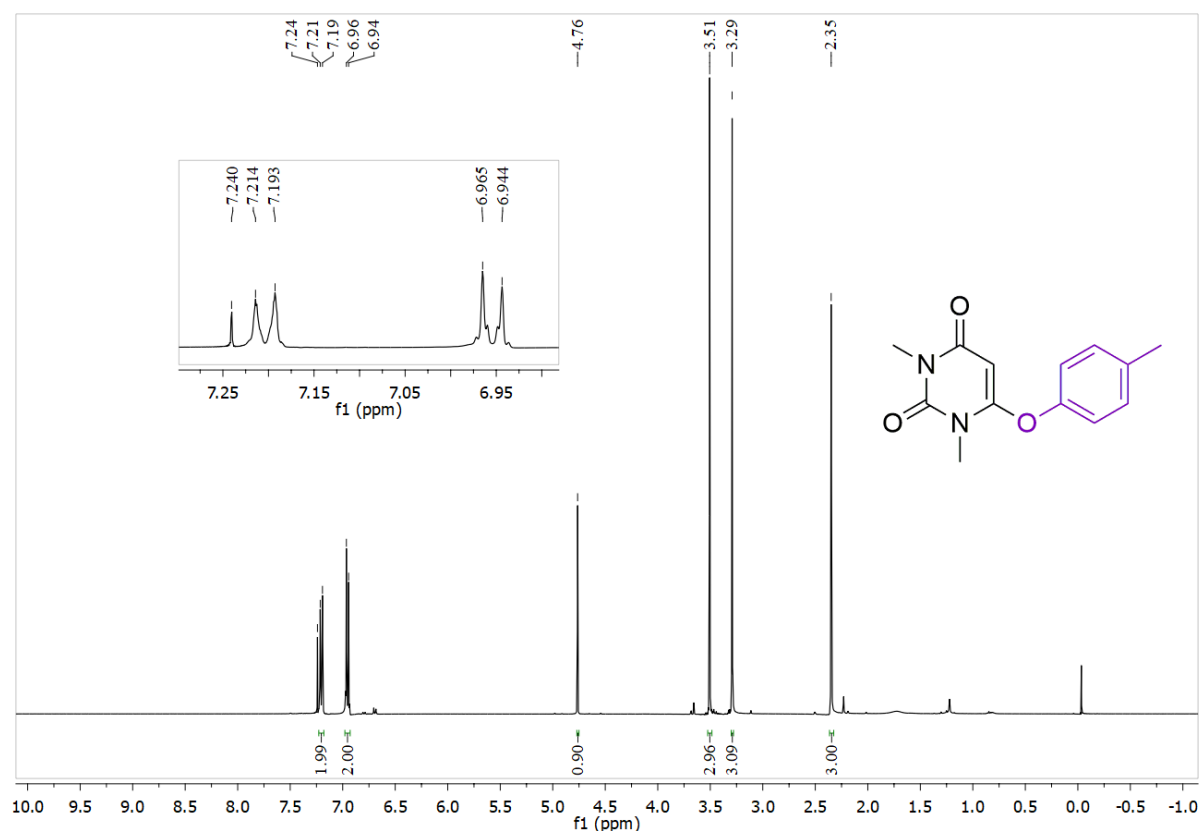

**Fig. S9:** <sup>1</sup>H NMR (400 MHz) spectra of **3d**

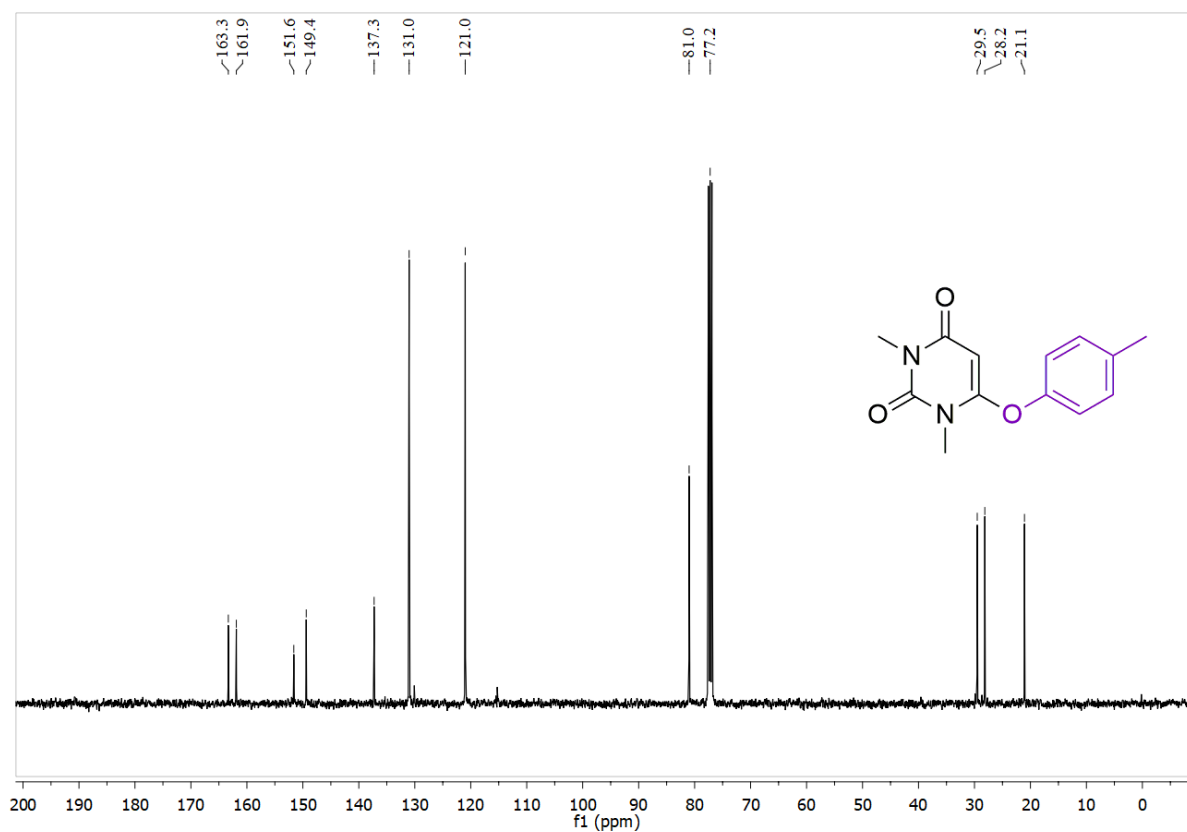

Fig. S10:  $^{13}\text{C}\{^1\text{H}\}$  NMR (100 MHz) spectra of **3d**

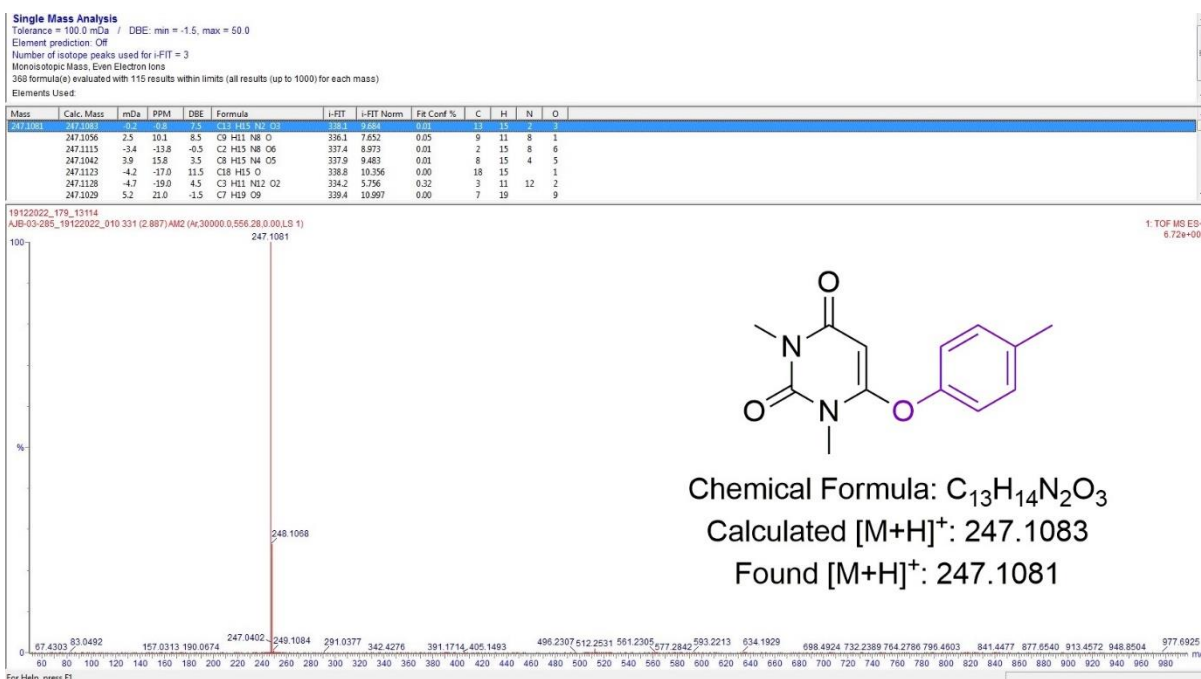

Fig. S11: HRMS spectrum of **3d**

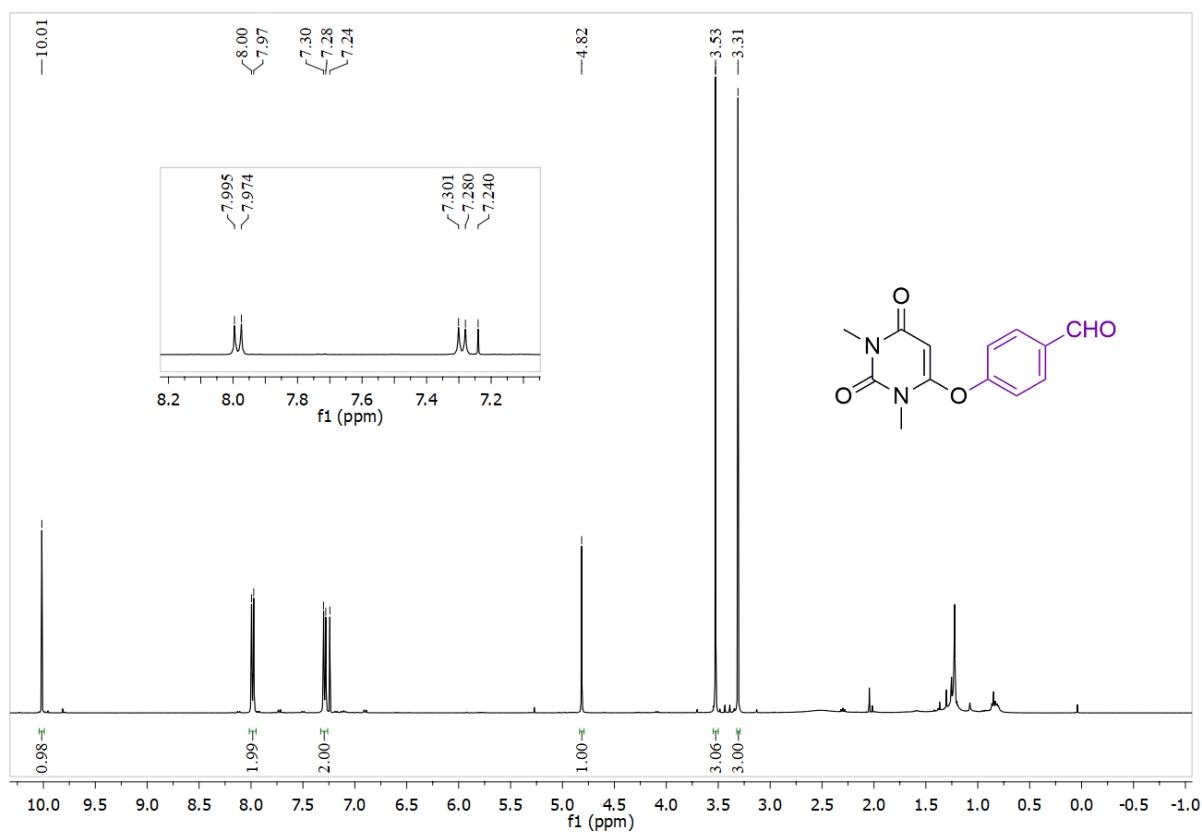

**Fig. S12:**  $^1\text{H}$  NMR (400 MHz) spectra of **3e**

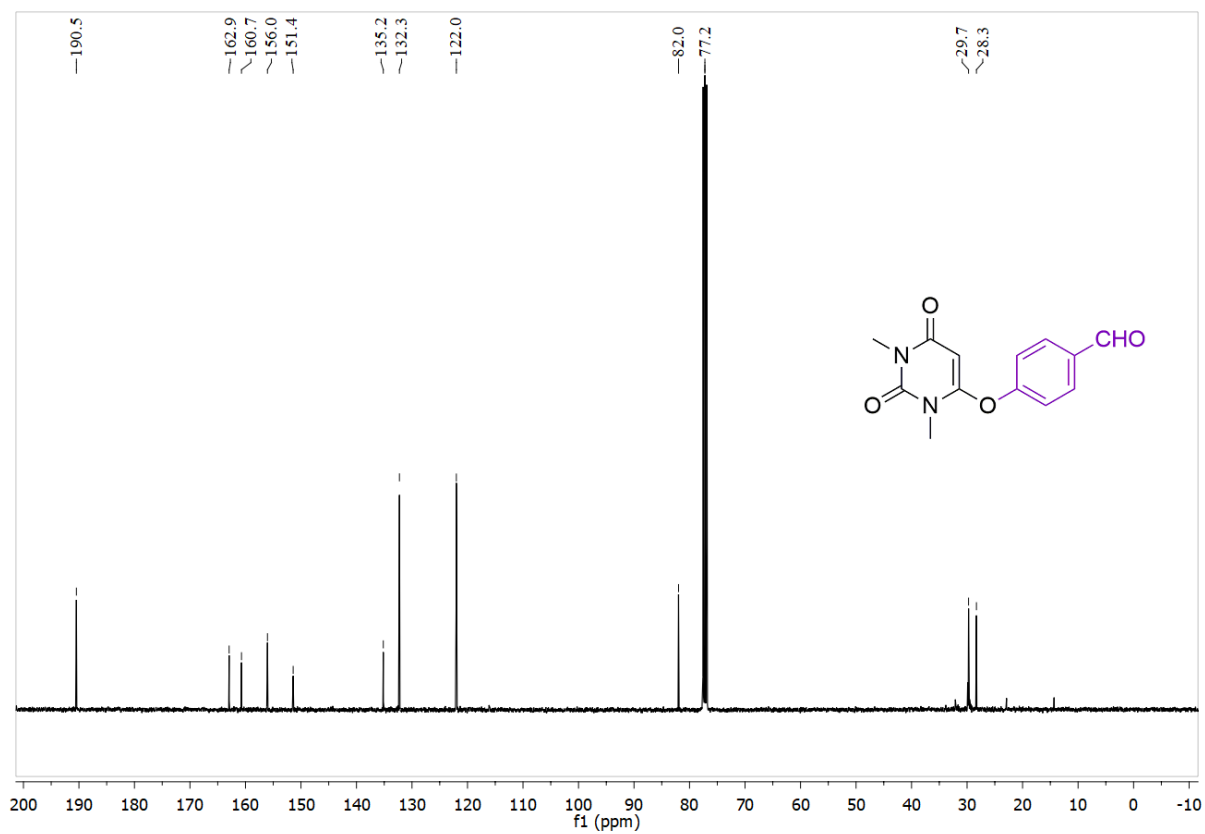

**Fig. S13:**  $^{13}\text{C}\{^1\text{H}\}$  NMR (100 MHz) spectra of **3e**

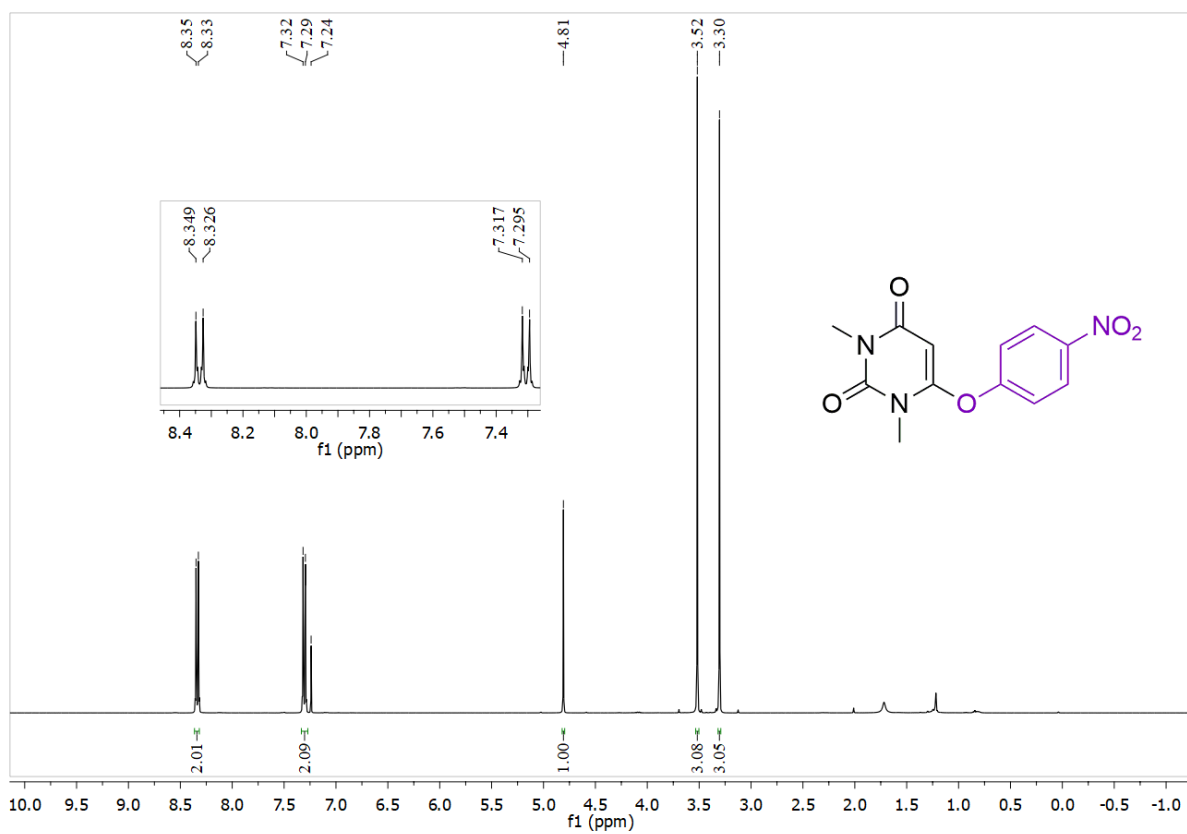

**Fig. S14:** <sup>1</sup>H NMR (400 MHz) spectra of **3f**

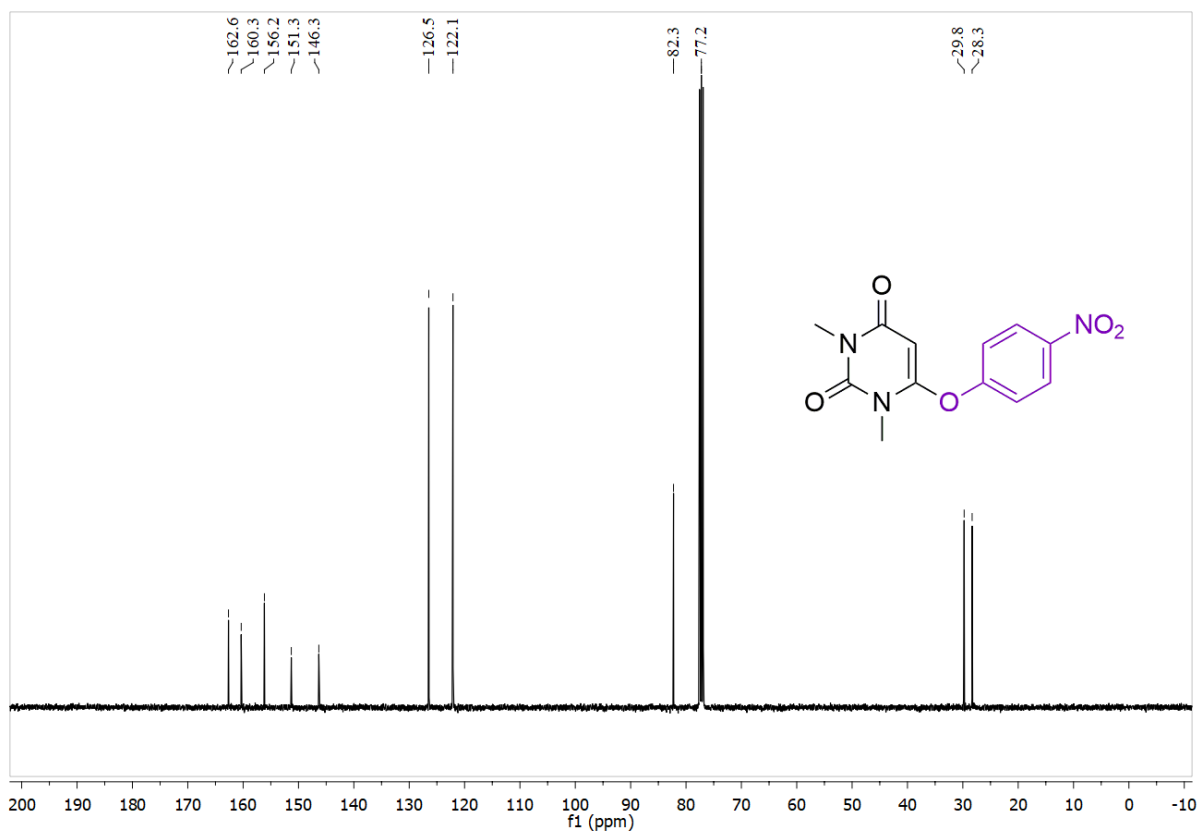

**Fig. S15:** <sup>13</sup>C{<sup>1</sup>H} NMR (100 MHz) spectra of **3f**

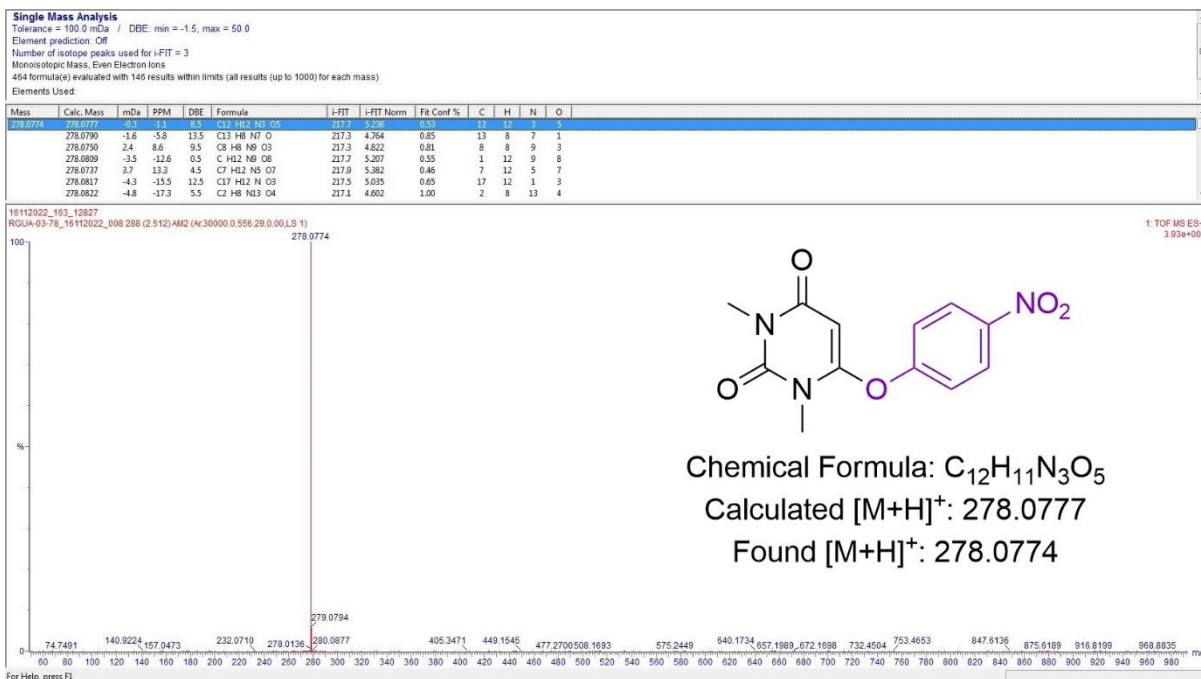

**Fig. S16:** HRMS spectrum of **3f**

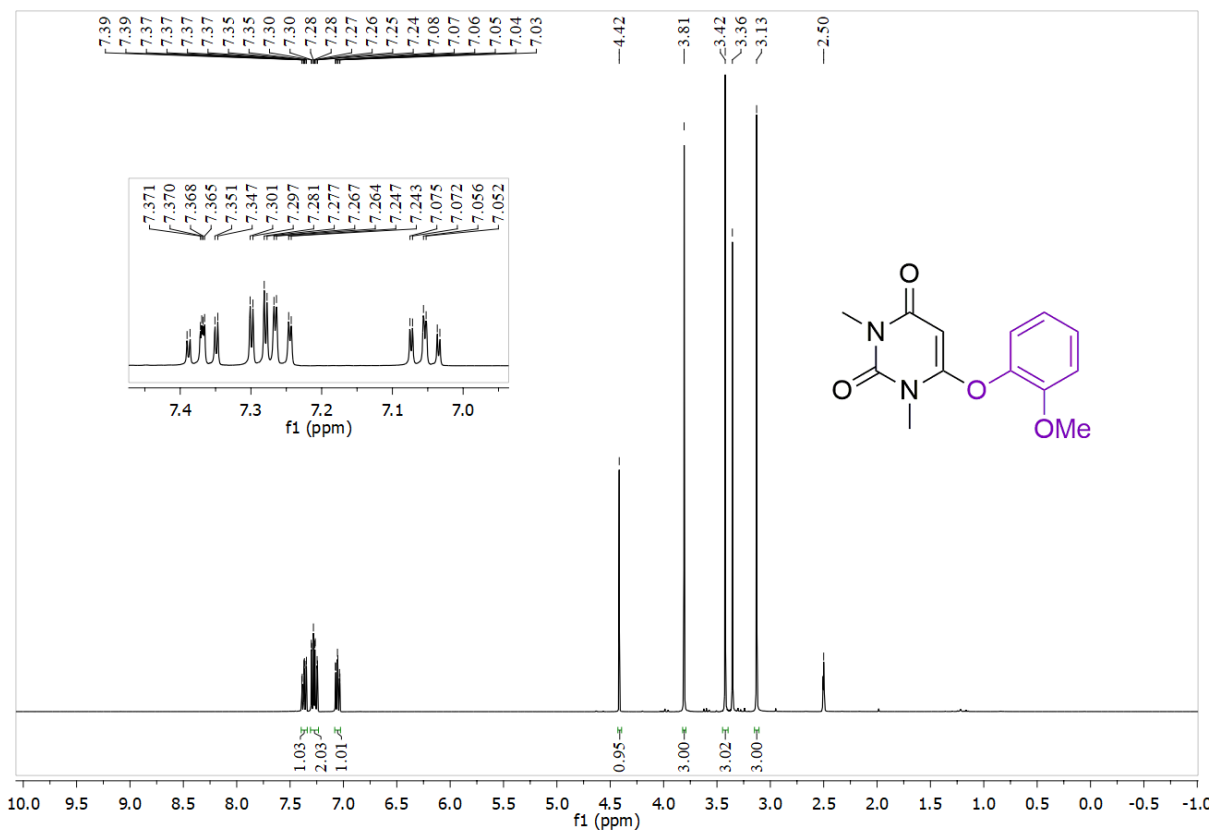

**Fig. S17:** <sup>1</sup>H NMR (400 MHz) spectra of **3g**



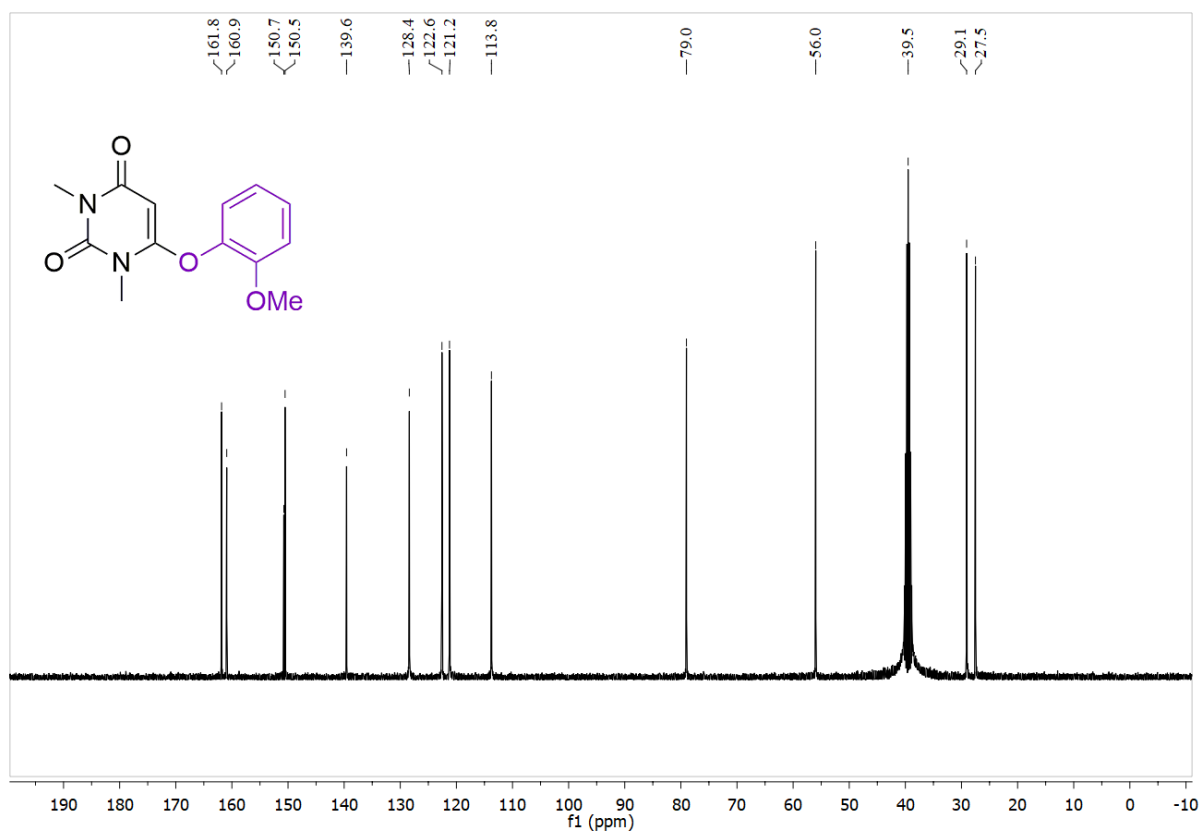

**Fig. S18:**  $^{13}\text{C}\{^1\text{H}\}$  NMR (100 MHz) spectra of **3g**

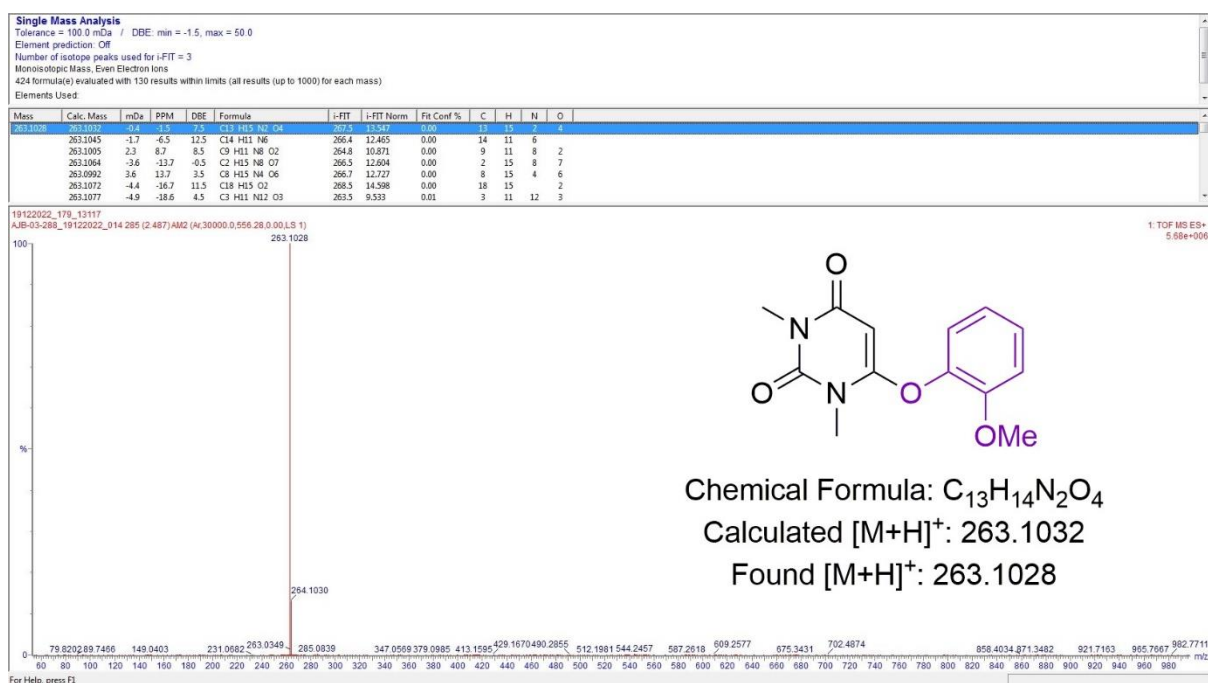

**Fig. S19:** HRMS spectrum of **3g**

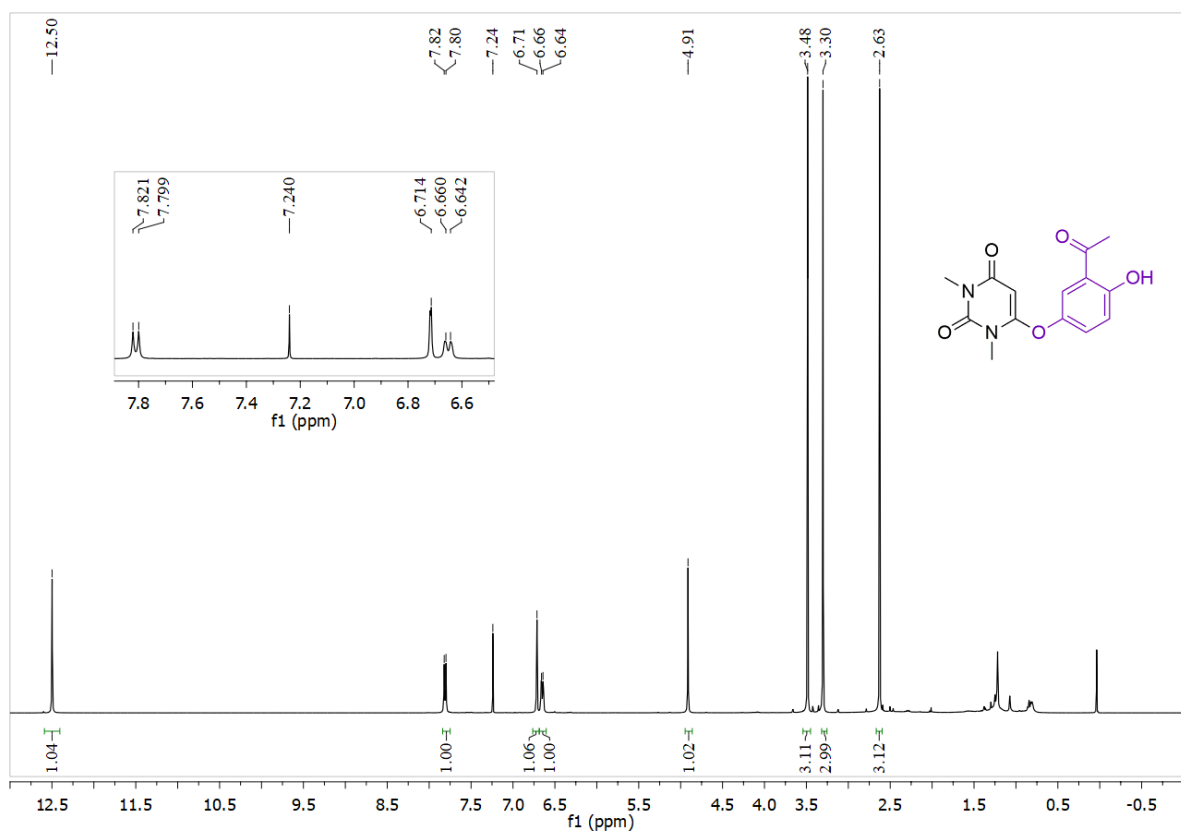

**Fig. S20:**  $^1\text{H}$  NMR (400 MHz) spectra of **3h**

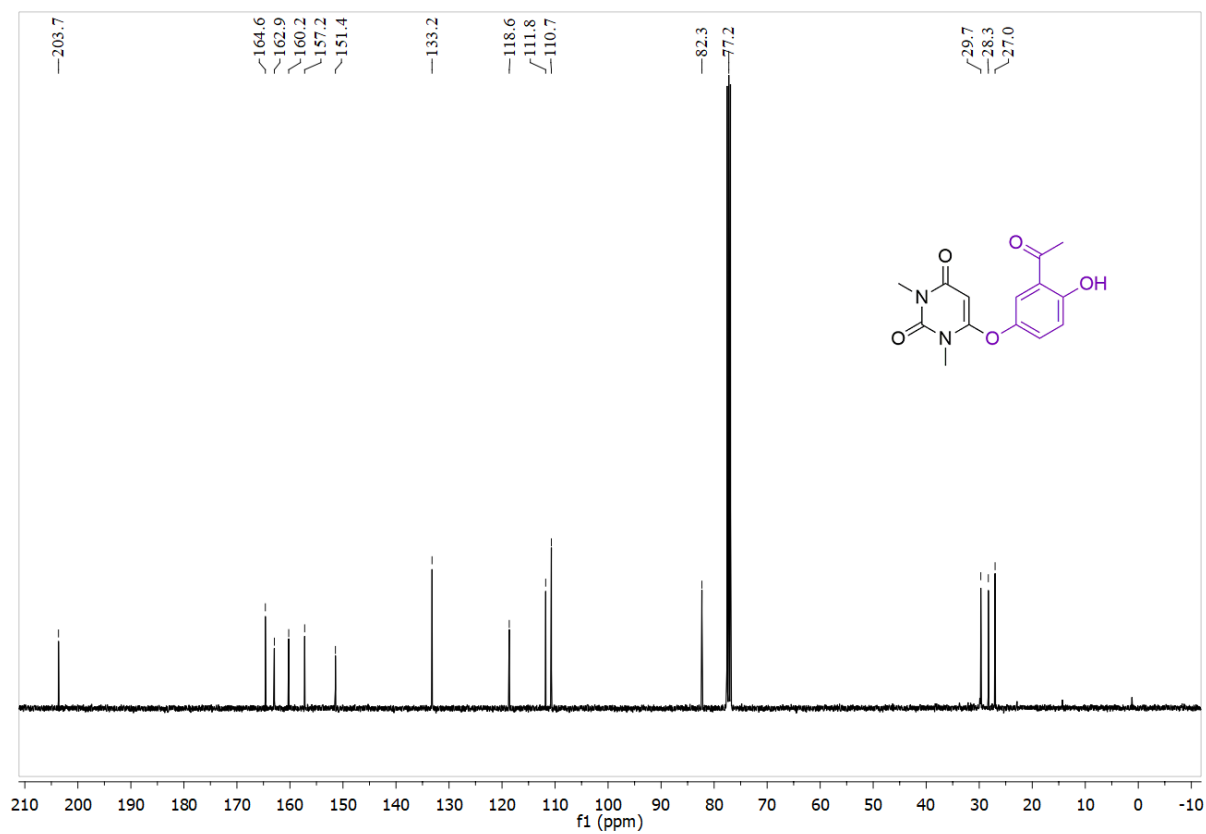

**Fig. S21:**  $^{13}\text{C}\{^1\text{H}\}$  NMR (100 MHz) spectra of **3h**

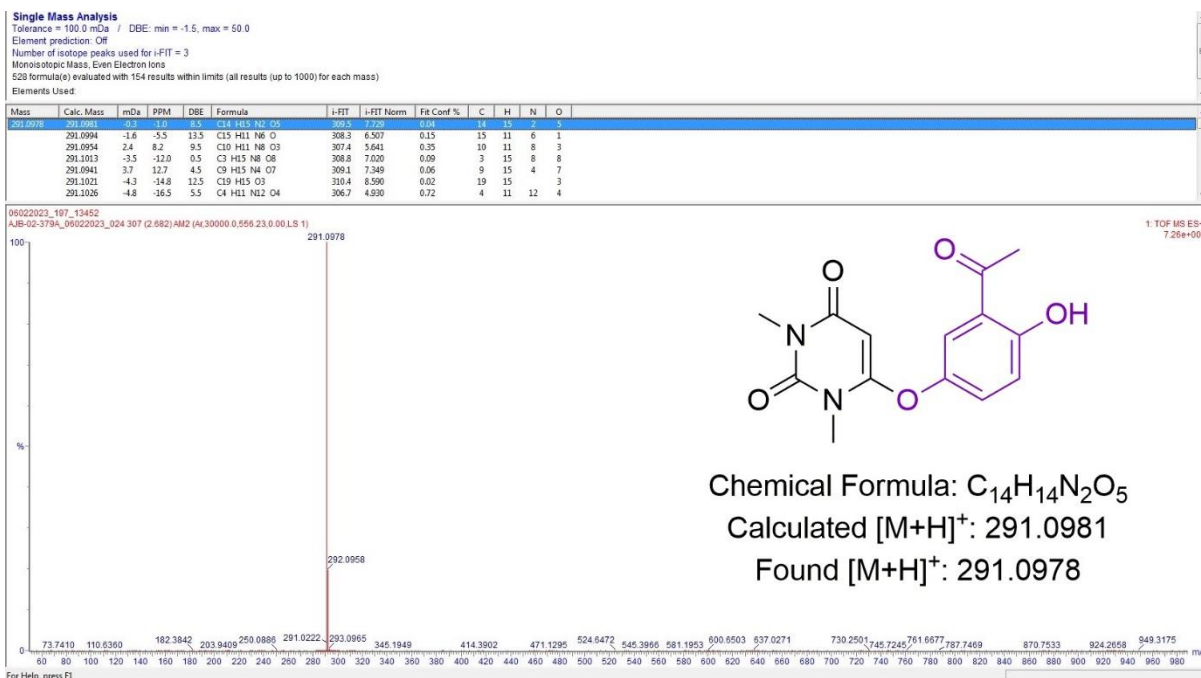

**Fig. S22:** HRMS spectrum of **3h**

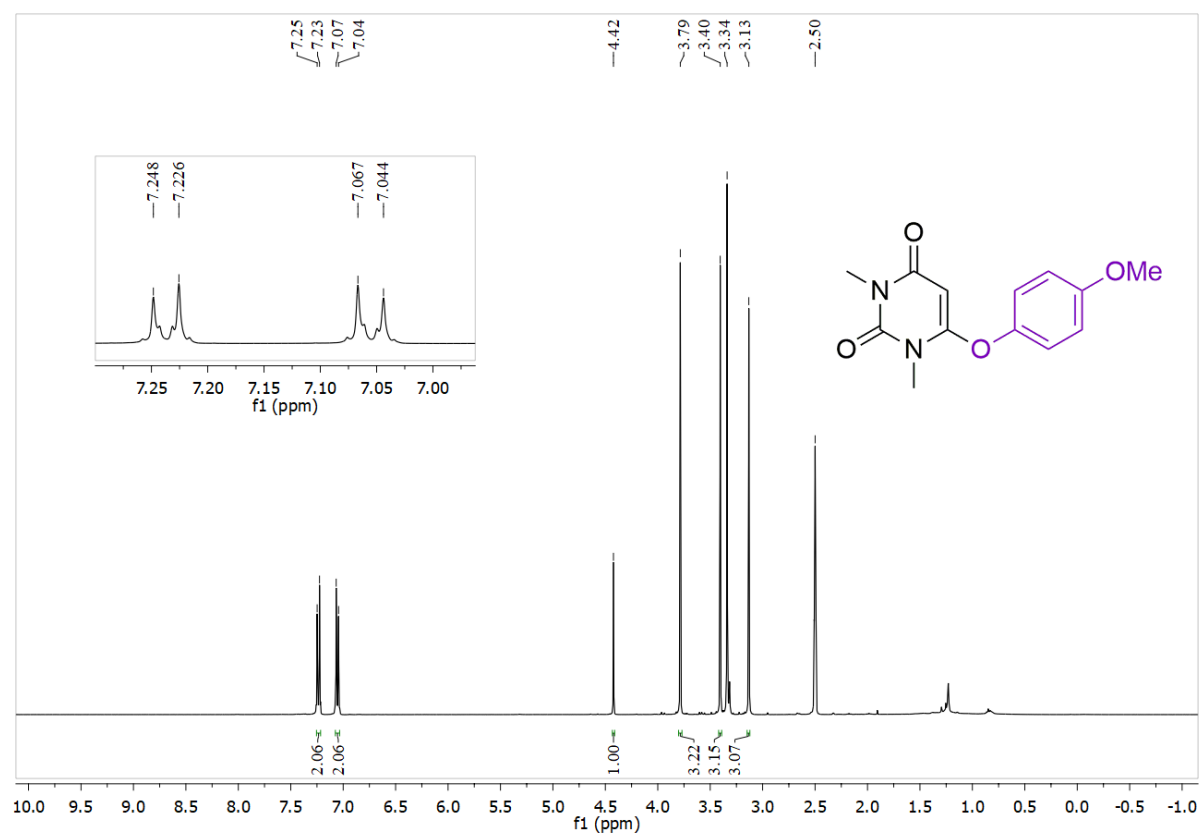

**Fig. S23:** <sup>1</sup>H NMR (400 MHz) spectra **3i**

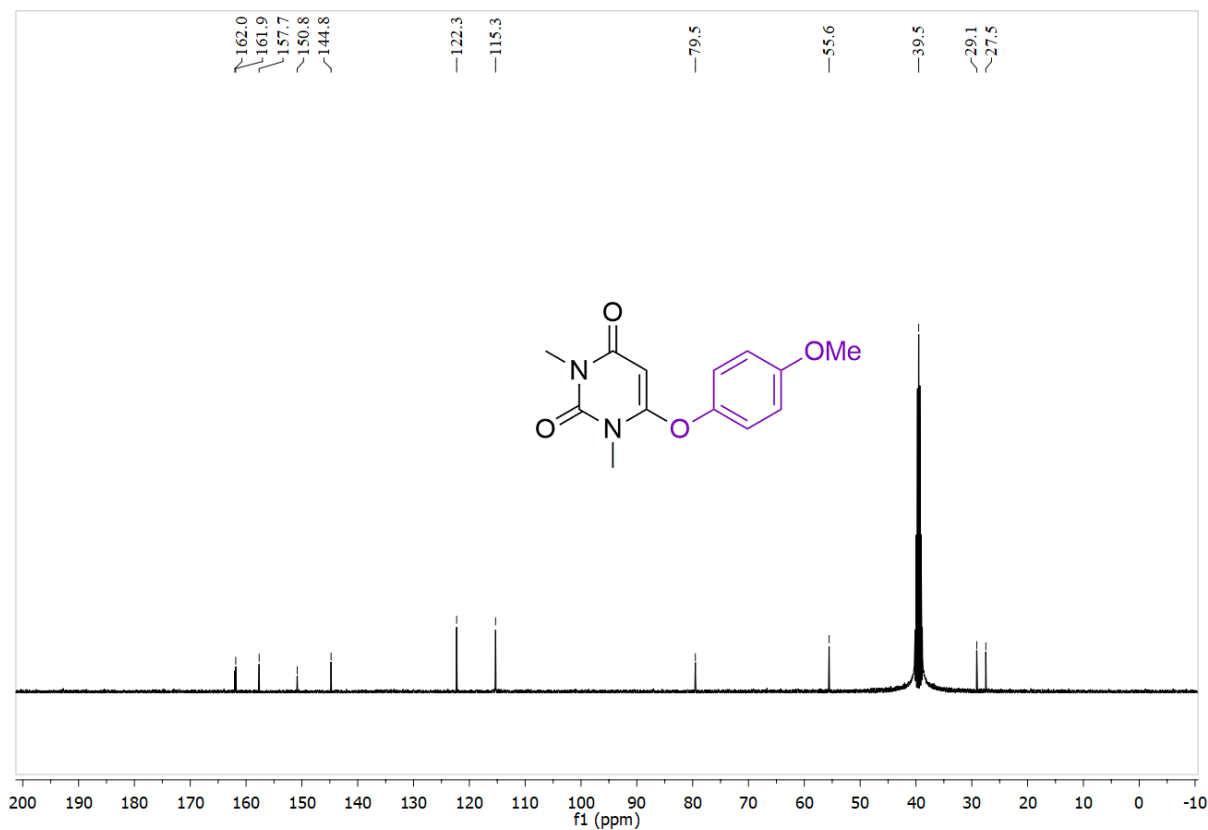

Fig. S24  $^{13}\text{C}\{^1\text{H}\}$  NMR (100 MHz) spectra of **3i**

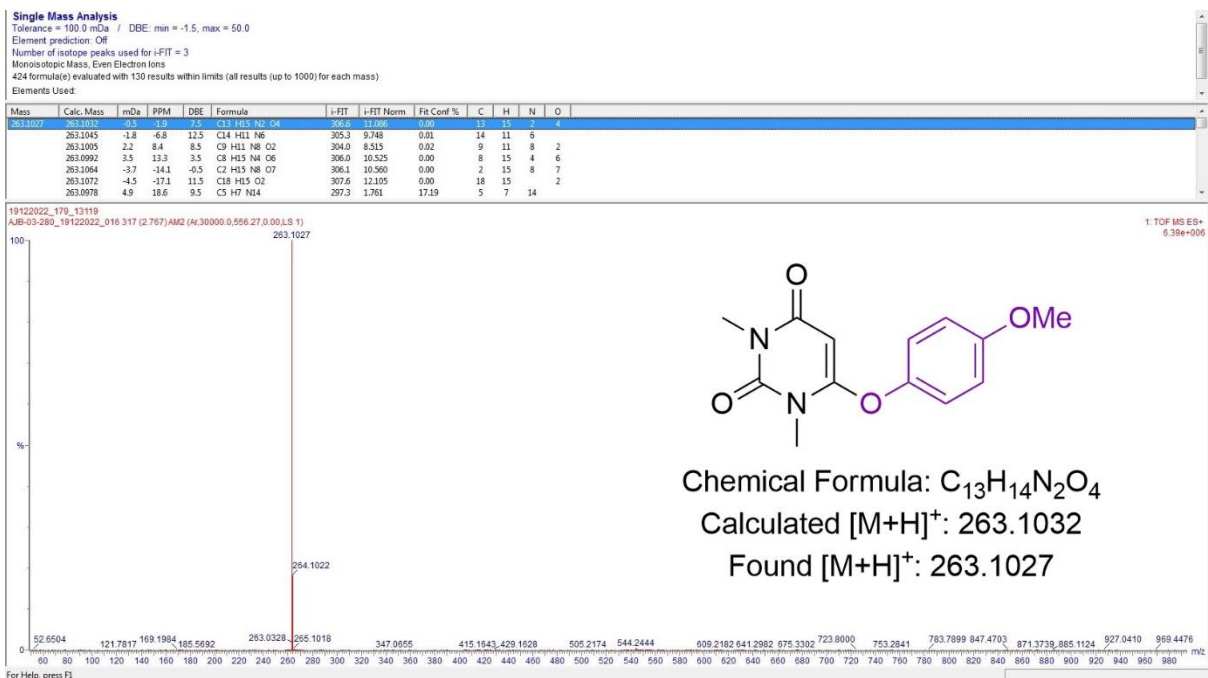

Fig. S25: HRMS spectrum of **3i**

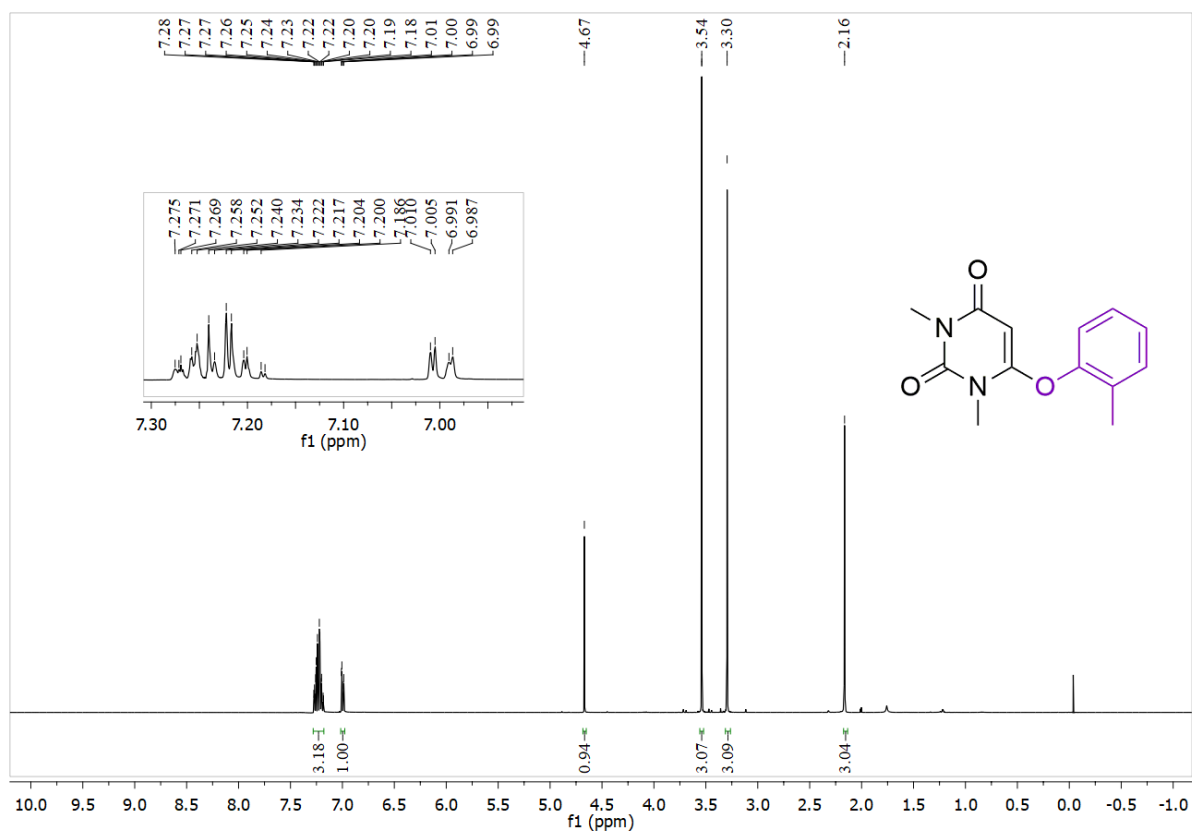

**Fig. S26:**  $^1\text{H NMR}$  (400 MHz) spectra **3j**

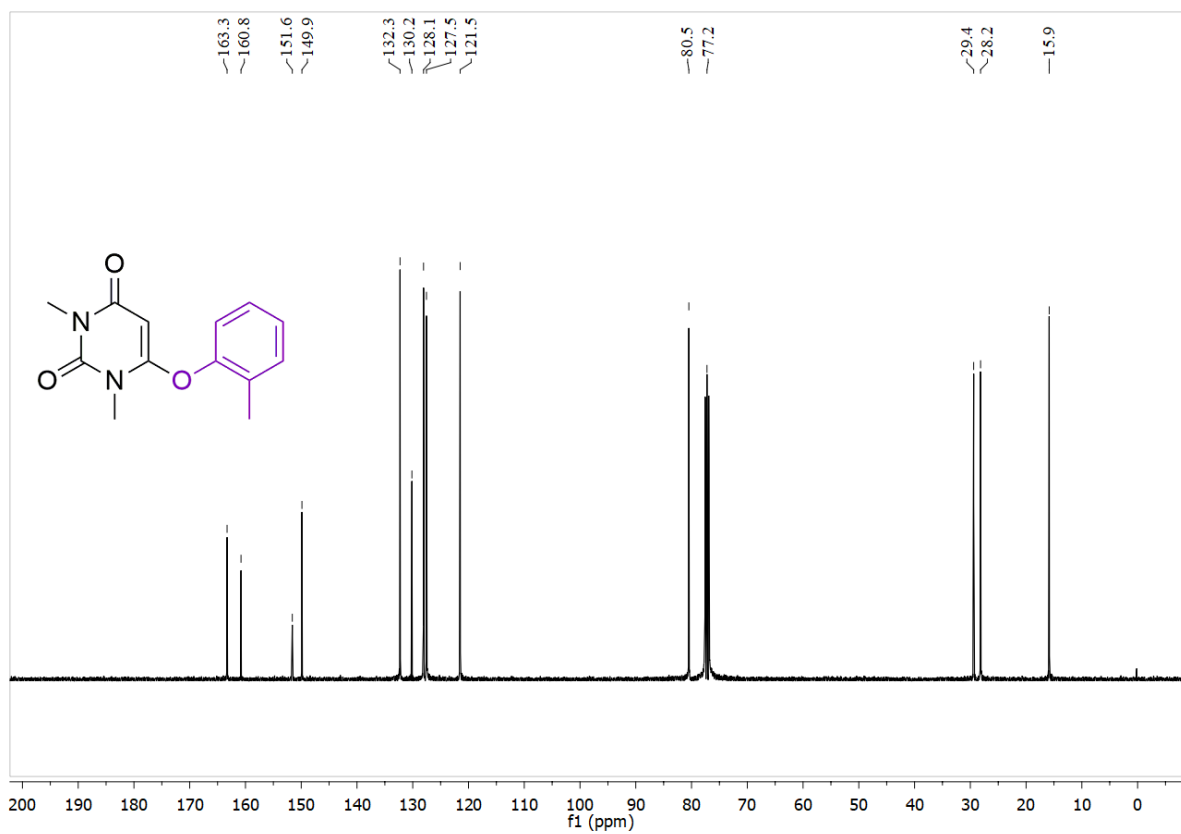

**Fig. S27:**  $^{13}\text{C}\{^1\text{H}\}$  NMR (100 MHz) spectra of **3j**

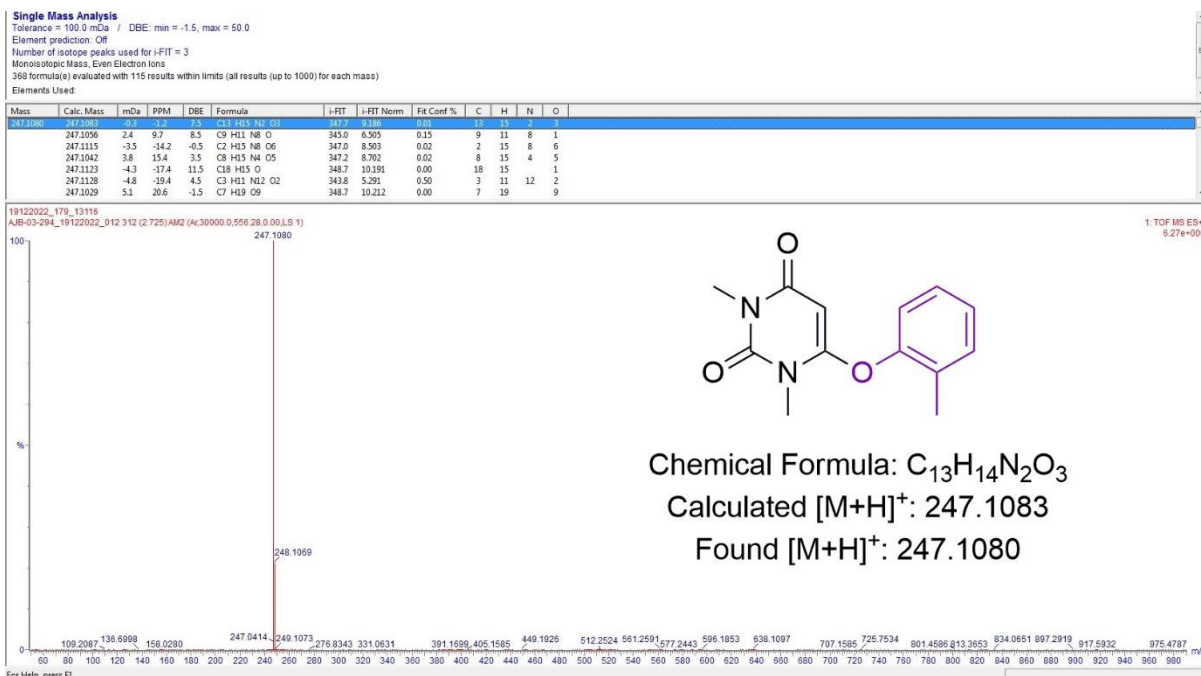

**Fig. S28: HRMS spectra of 3j**

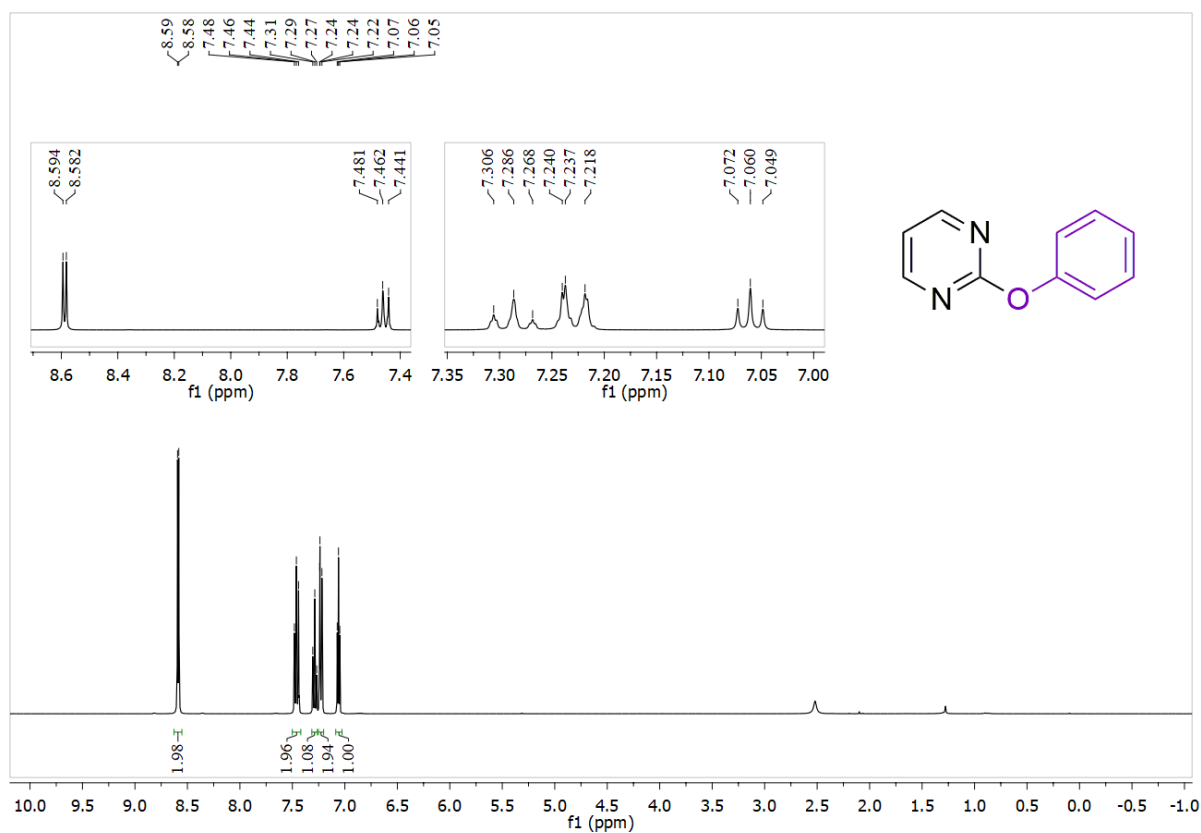

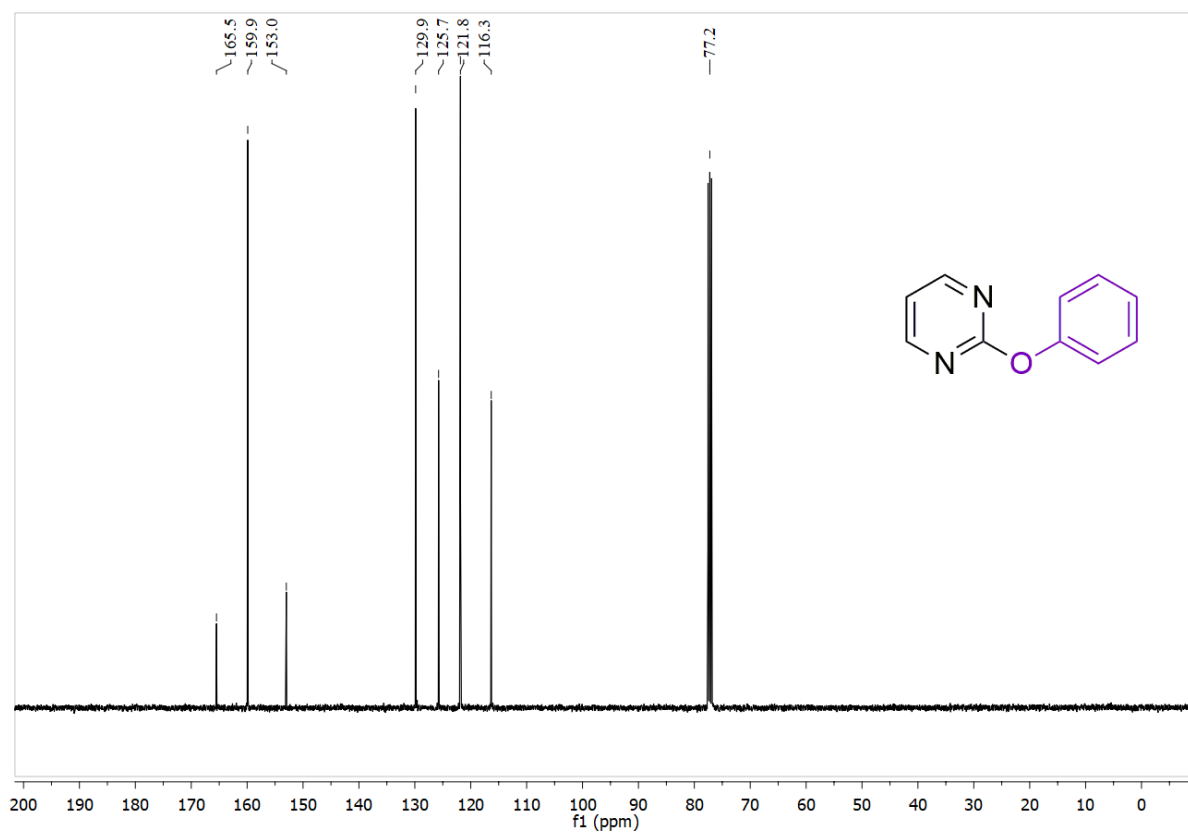

**Fig. S30:**  $^{13}\text{C}\{^1\text{H}\}$  NMR (100 MHz) spectra of **3k**

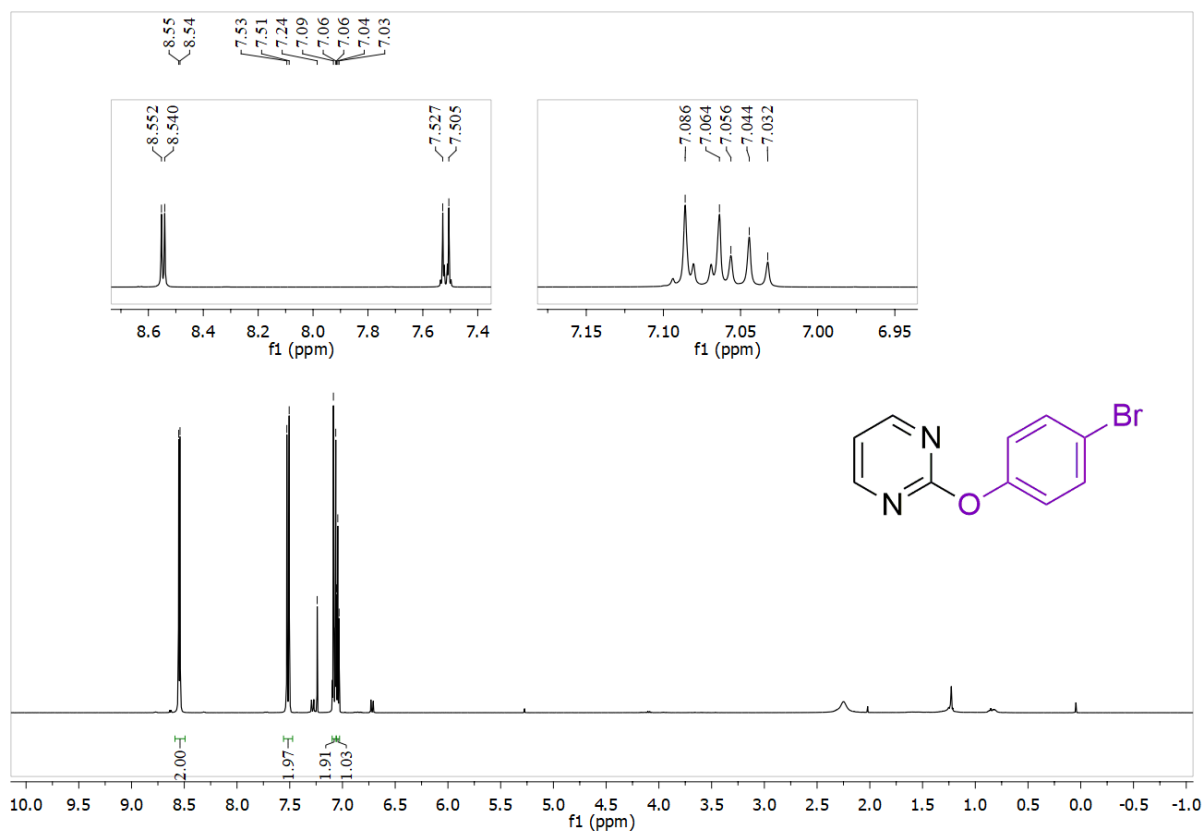

**Fig. S31:**  $^1\text{H}$  NMR (400 MHz) spectra **3l**

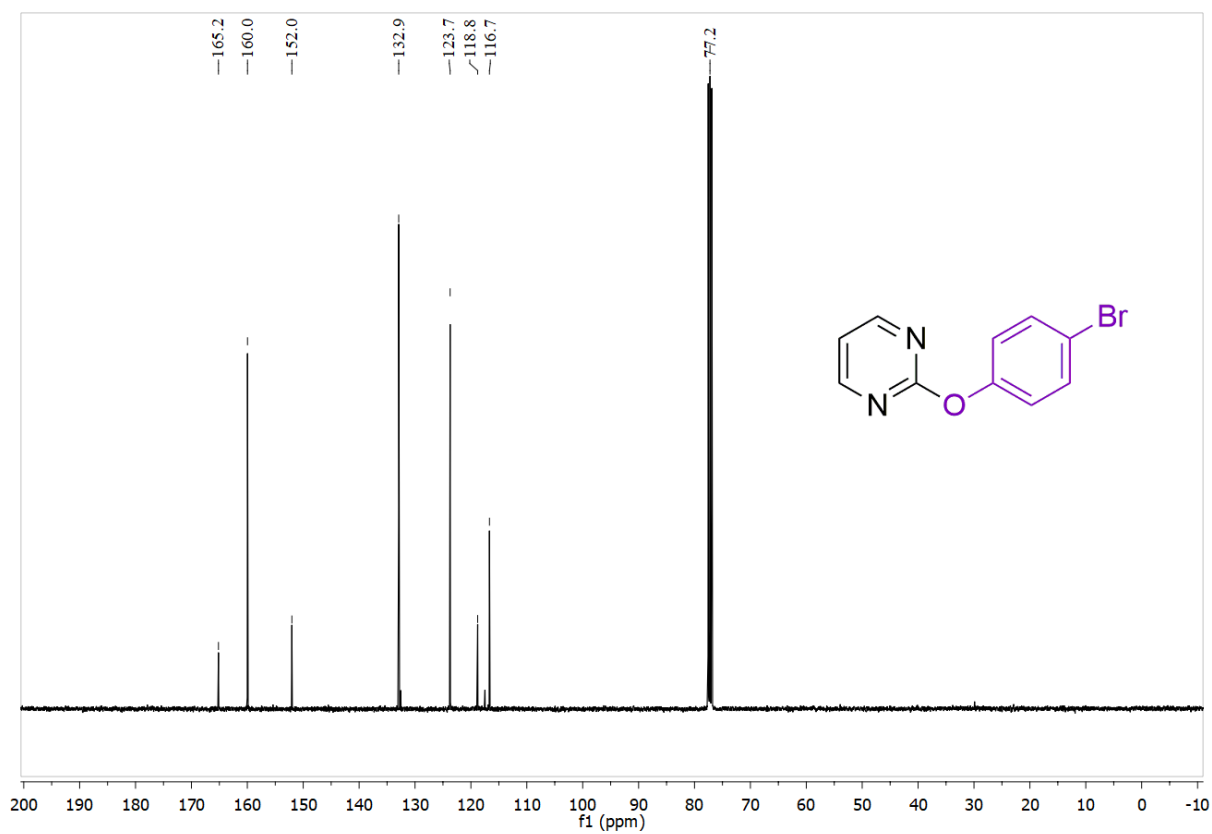

Fig. S32:  $^{13}\text{C}\{^1\text{H}\}$  NMR (100 MHz) spectra of **3l**

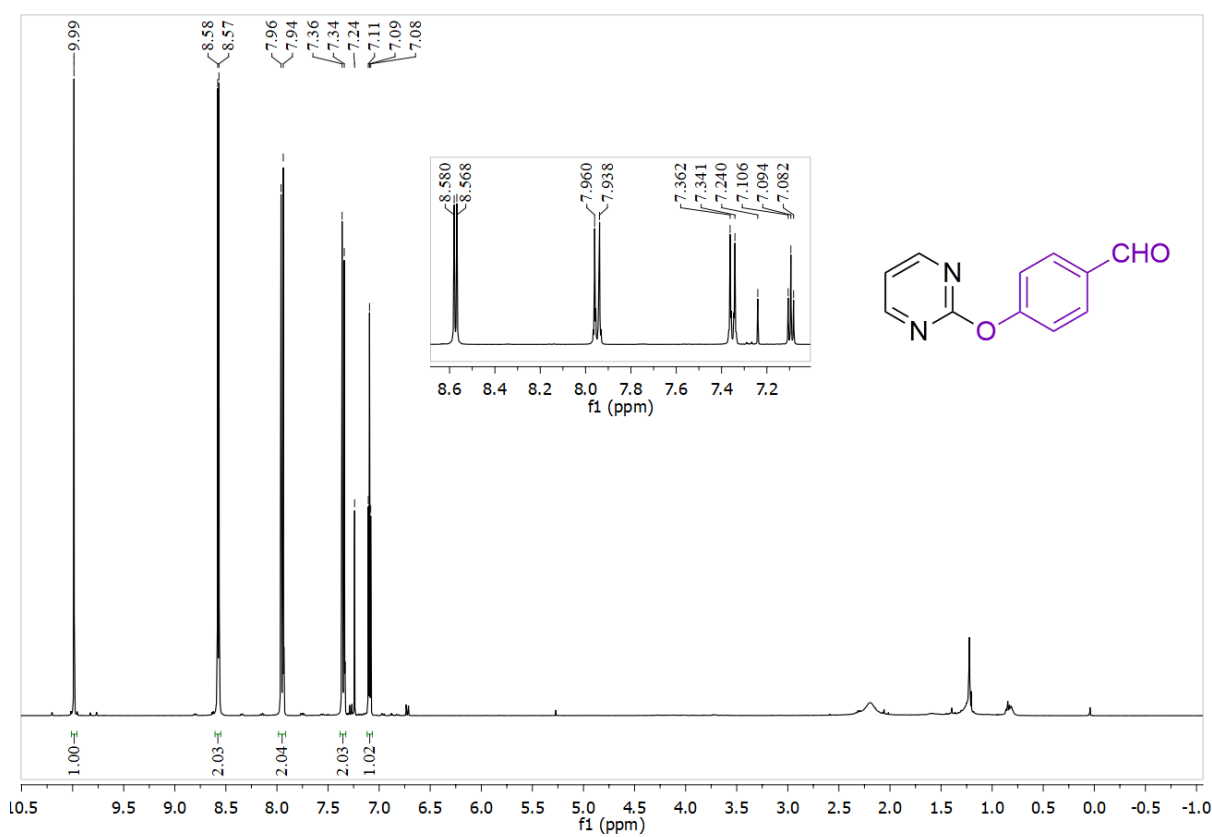

Fig. S33:  $^1\text{H}$  NMR (400 MHz) spectra **3m**



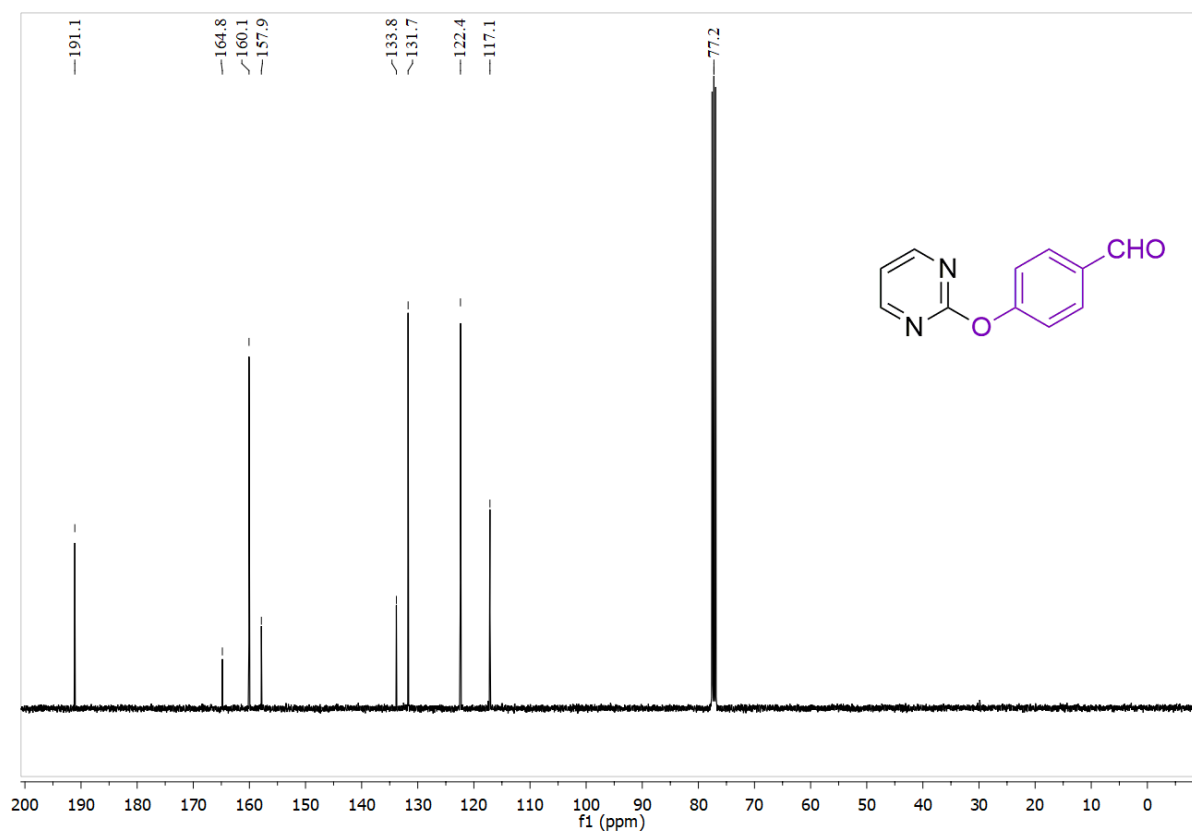

Fig. S34:  $^{13}\text{C}\{^1\text{H}\}$  NMR (100 MHz) spectra of 3m

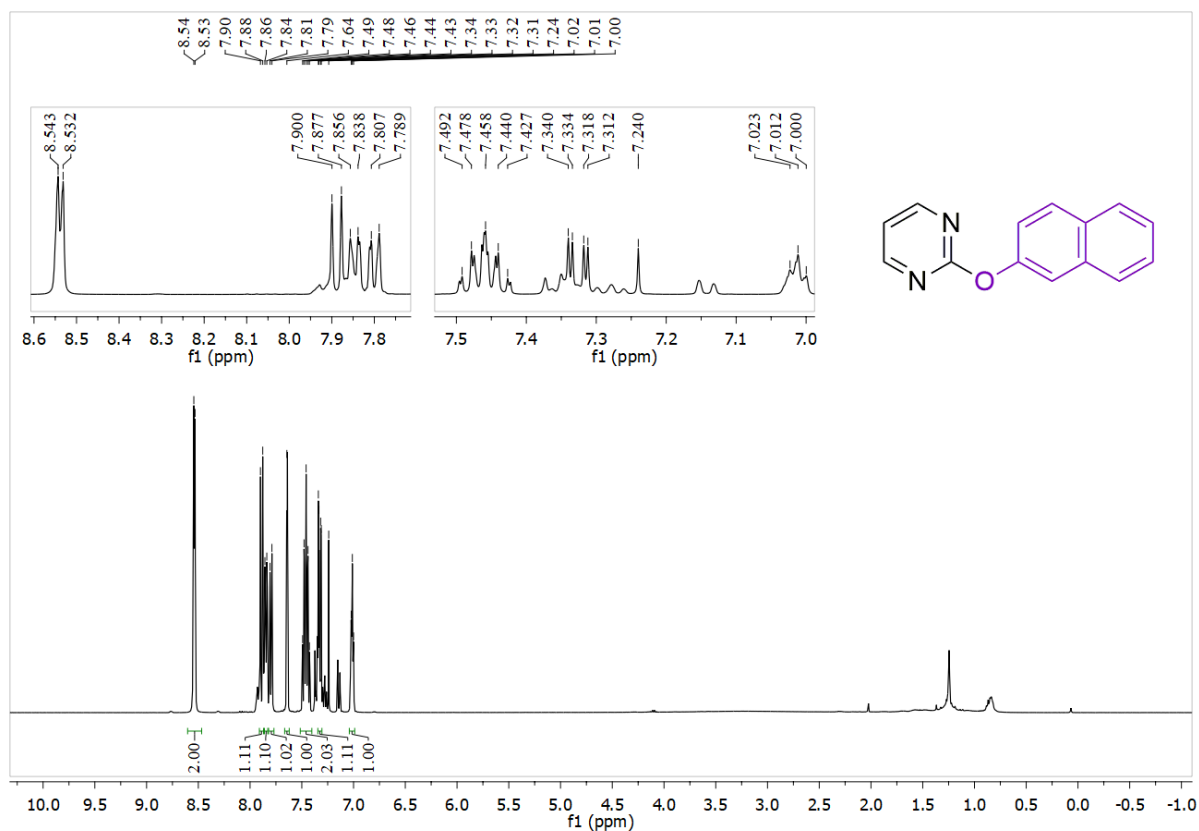

Fig. S35:  $^1\text{H}$  NMR (400 MHz) spectra 3n

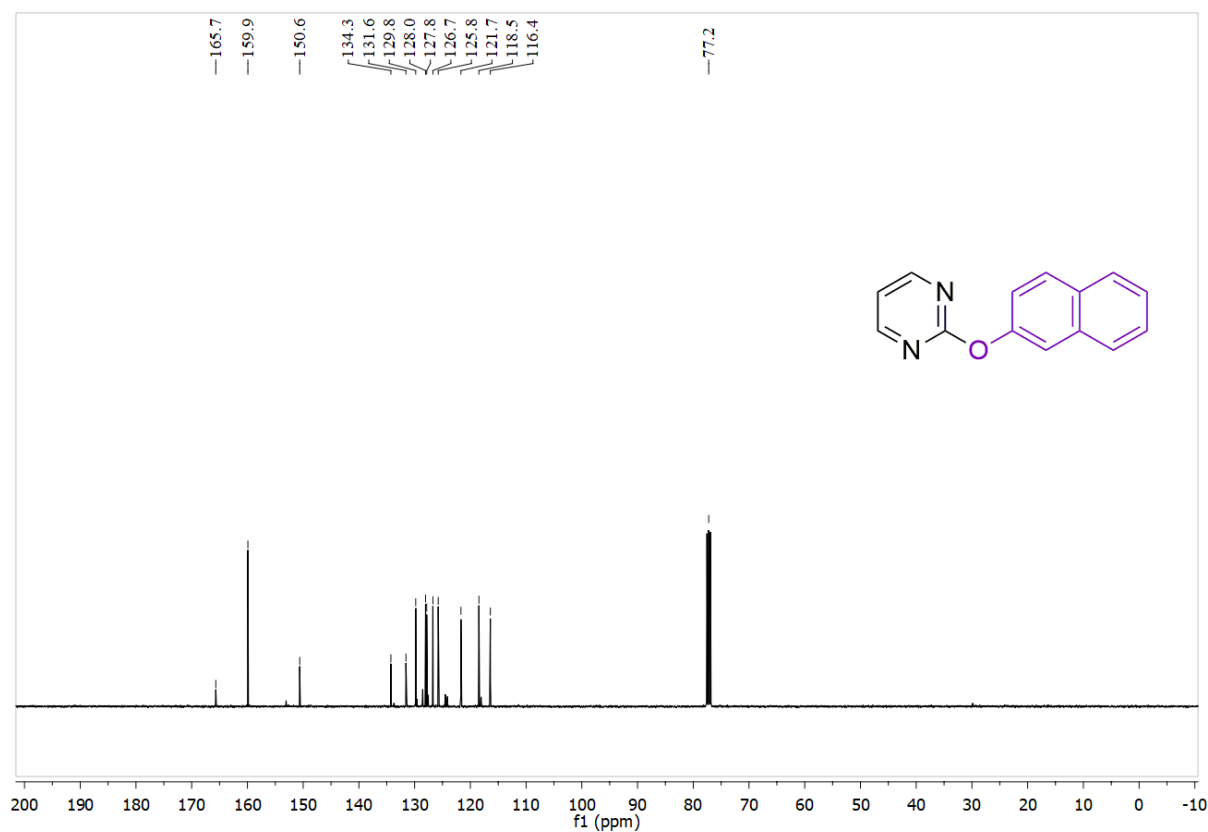

Fig. S36:  $^{13}\text{C}\{^1\text{H}\}$  NMR (100 MHz) spectra of **3n**

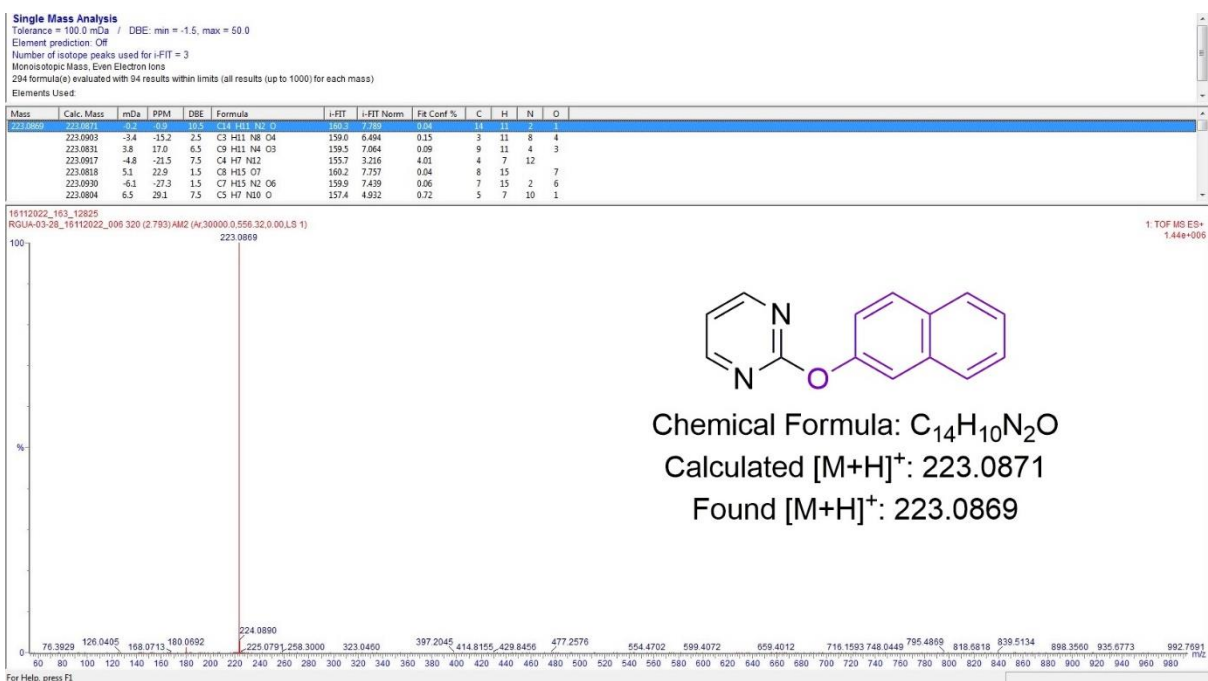

Fig. S37: HRMS spectra of **3n**

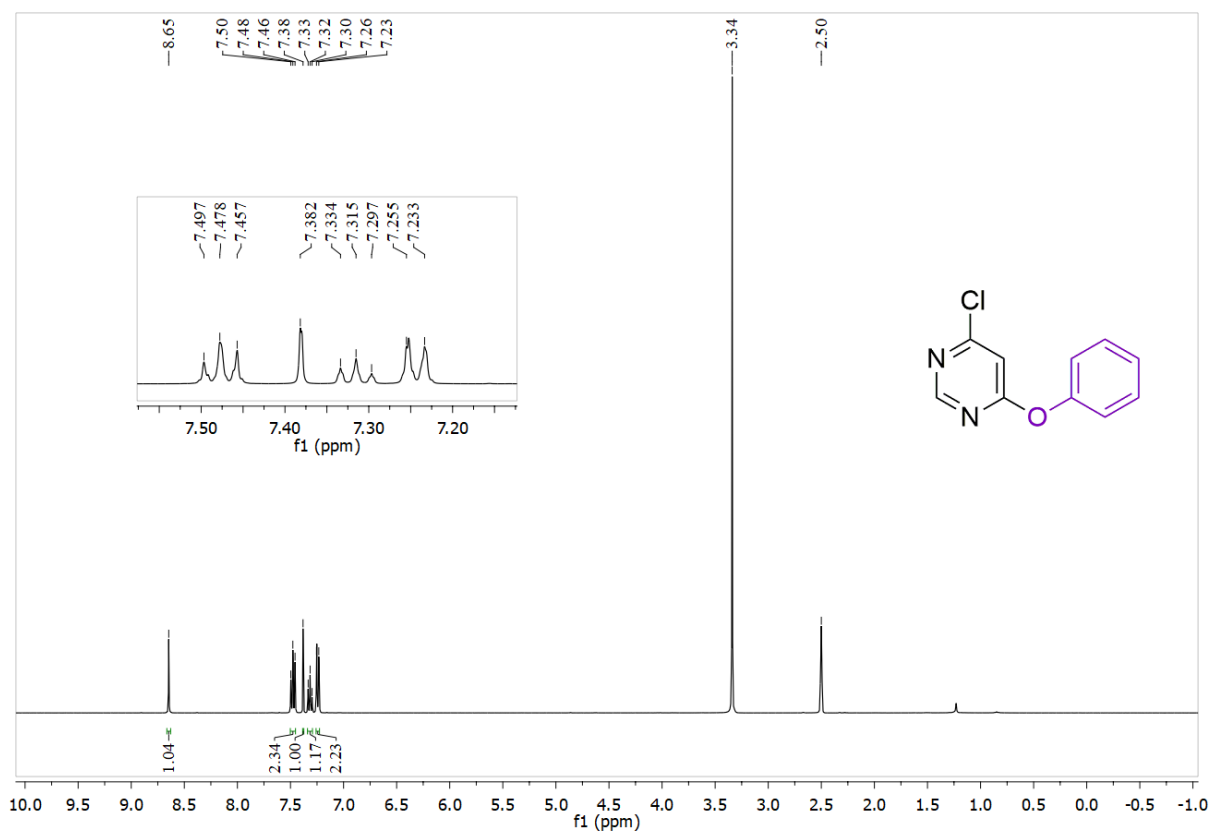

**Fig. S38:** <sup>1</sup>H NMR (400 MHz) spectra **3o**

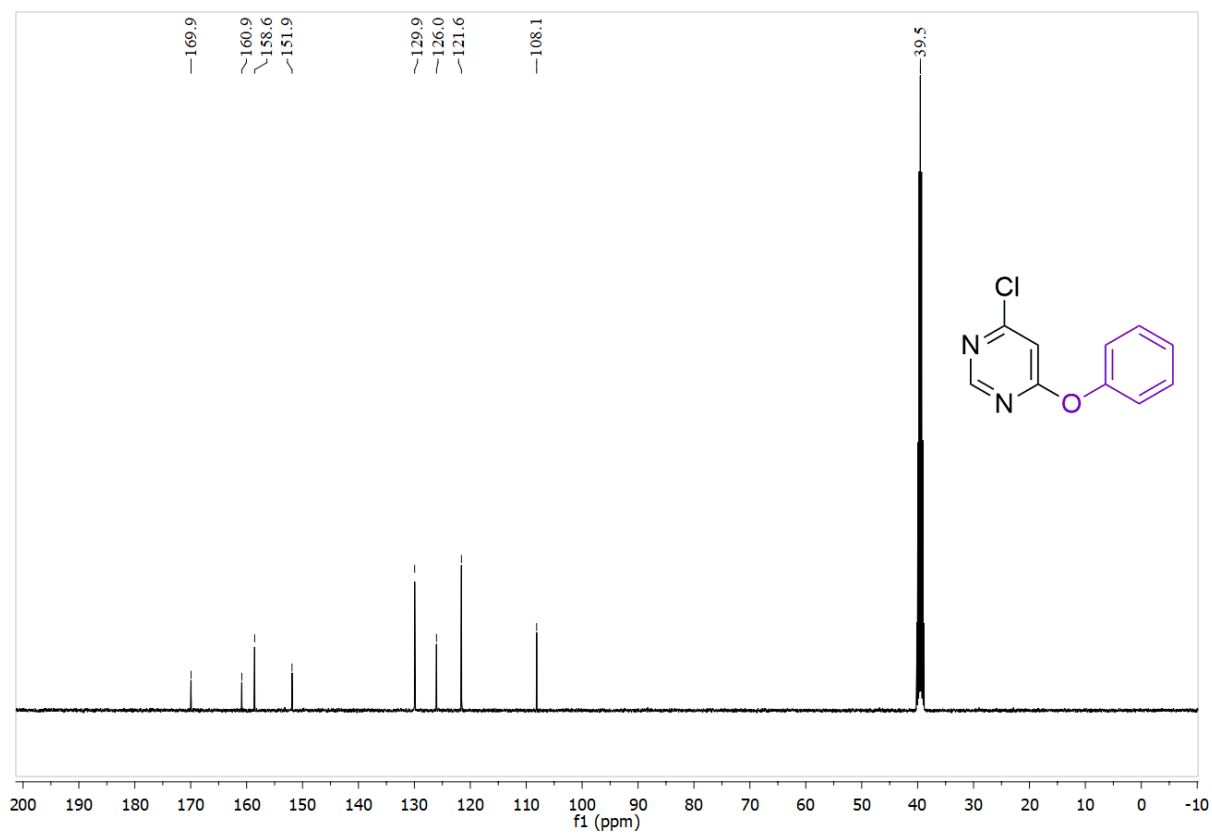

**Fig. S39:** <sup>13</sup>C{<sup>1</sup>H} NMR (100 MHz) spectra of **3o**

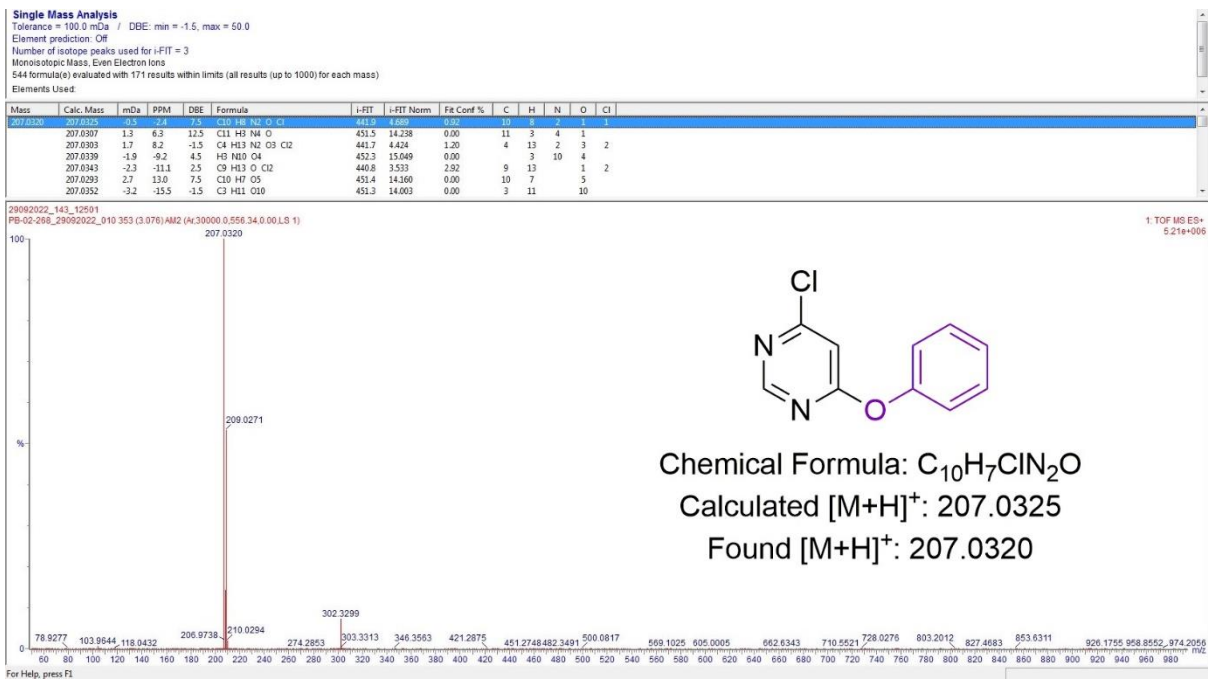

**Fig. S40: HRMS spectra of 3o**

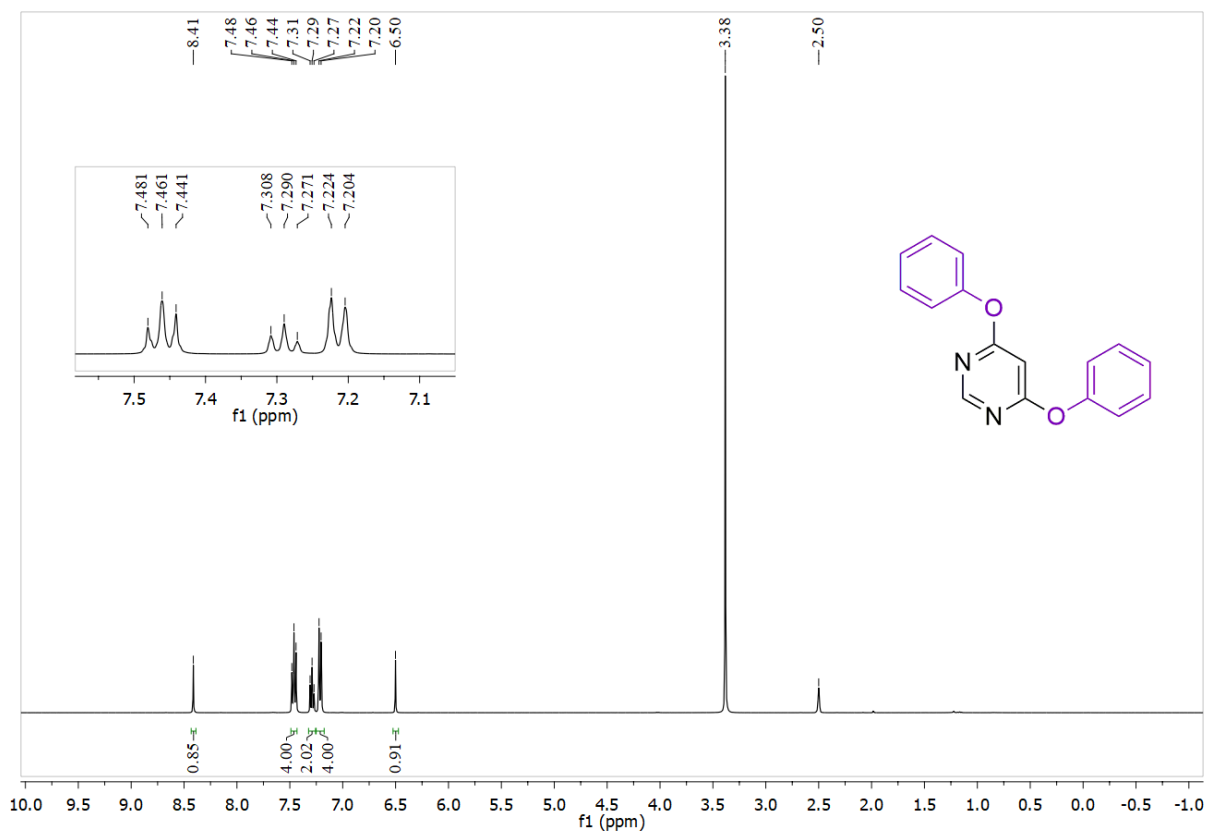

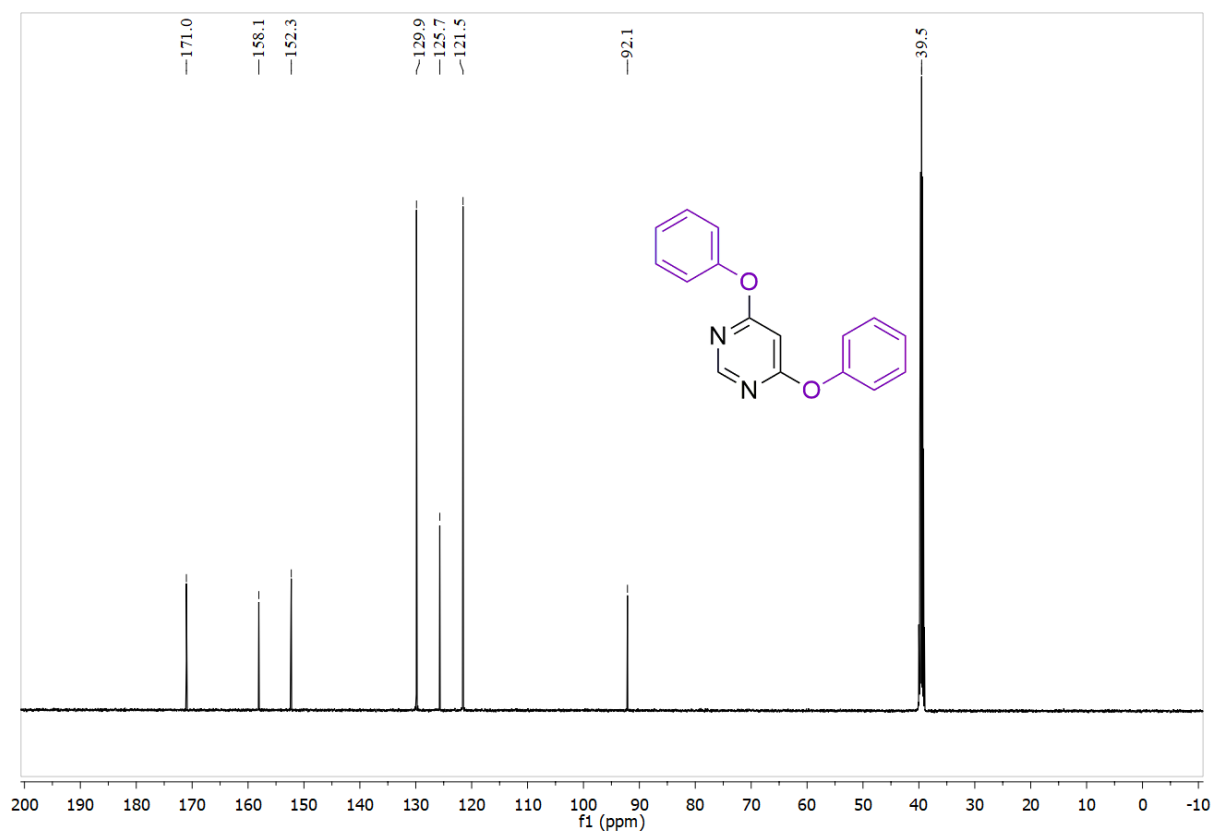

Fig. S42:  $^{13}\text{C}\{^1\text{H}\}$  NMR (100 MHz) spectra of **3p**

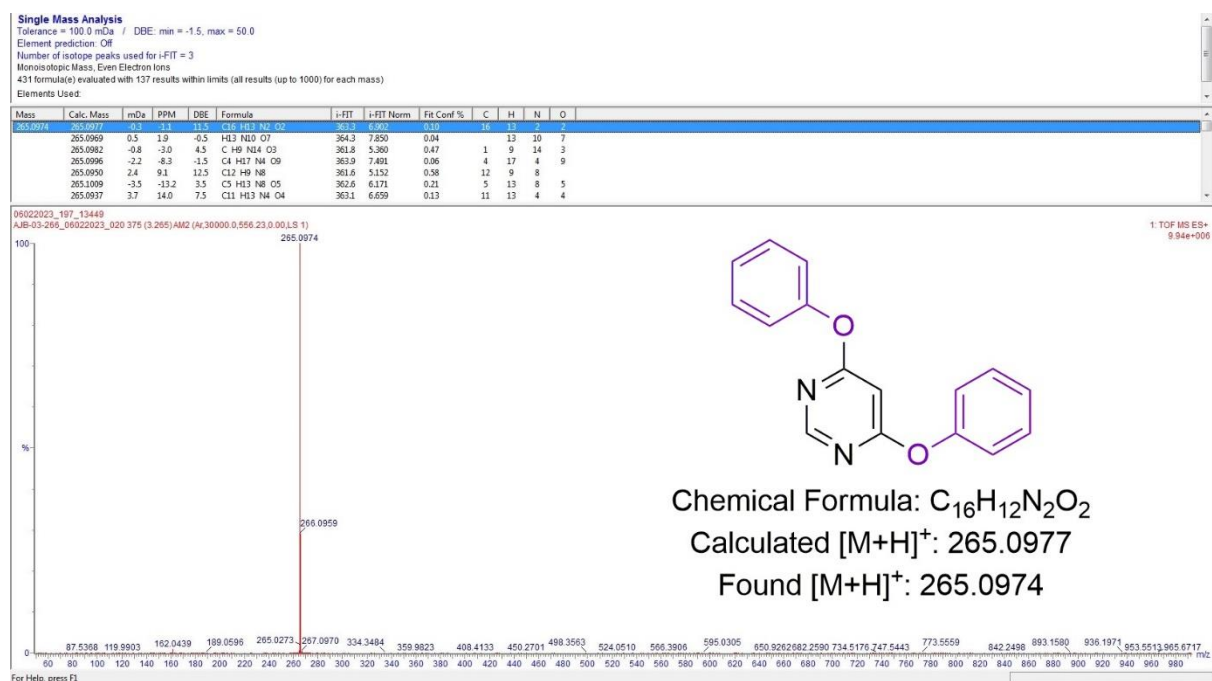

Fig. S43: HRMS spectra of **3p**

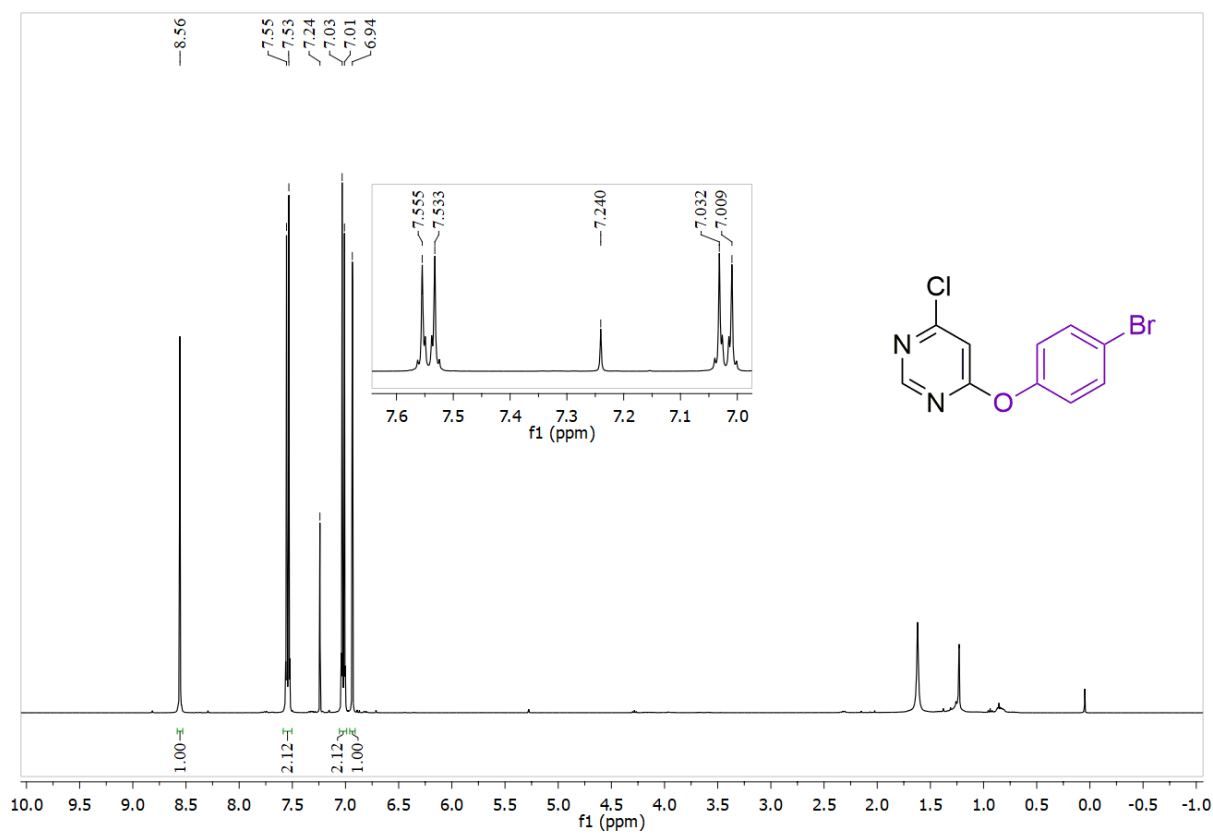

**Fig. S44:**  $^1\text{H}$  NMR (400 MHz) spectra **3q**

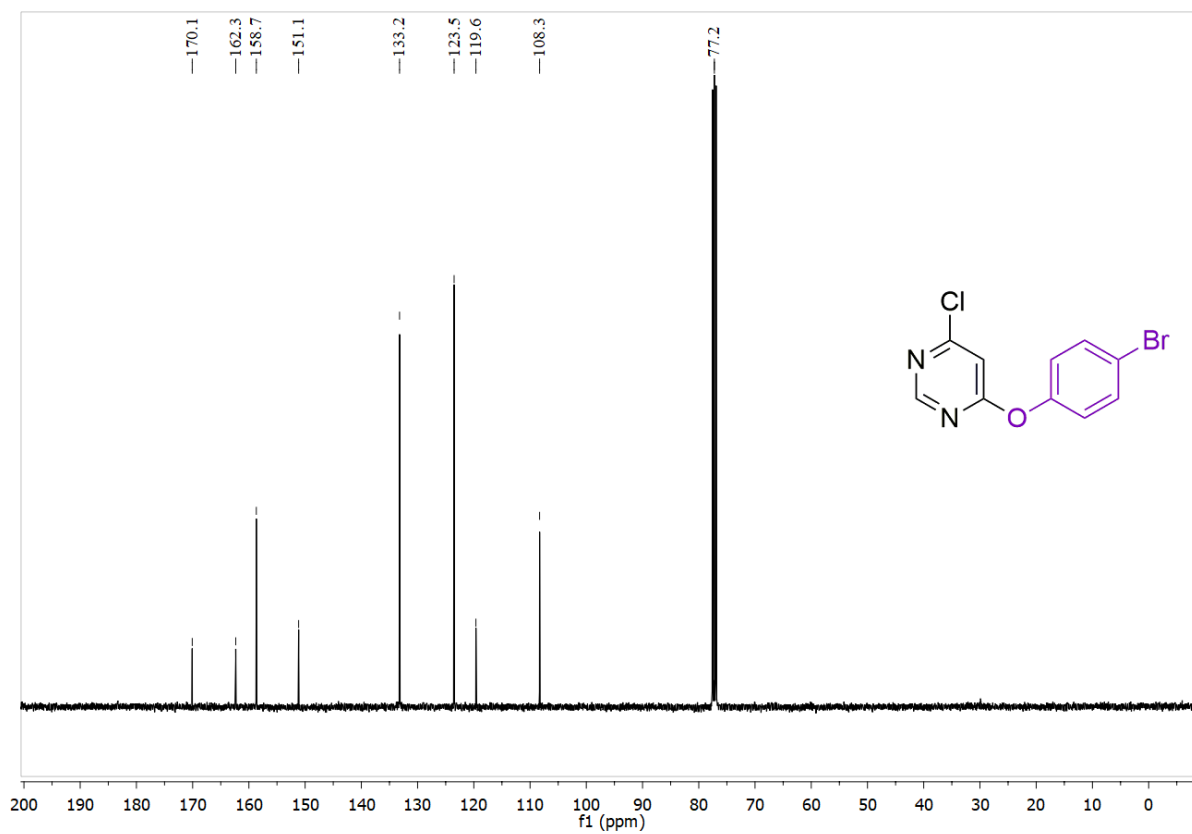

**Fig. S45:**  $^{13}\text{C}\{^1\text{H}\}$  NMR (100 MHz) spectra of **3q**



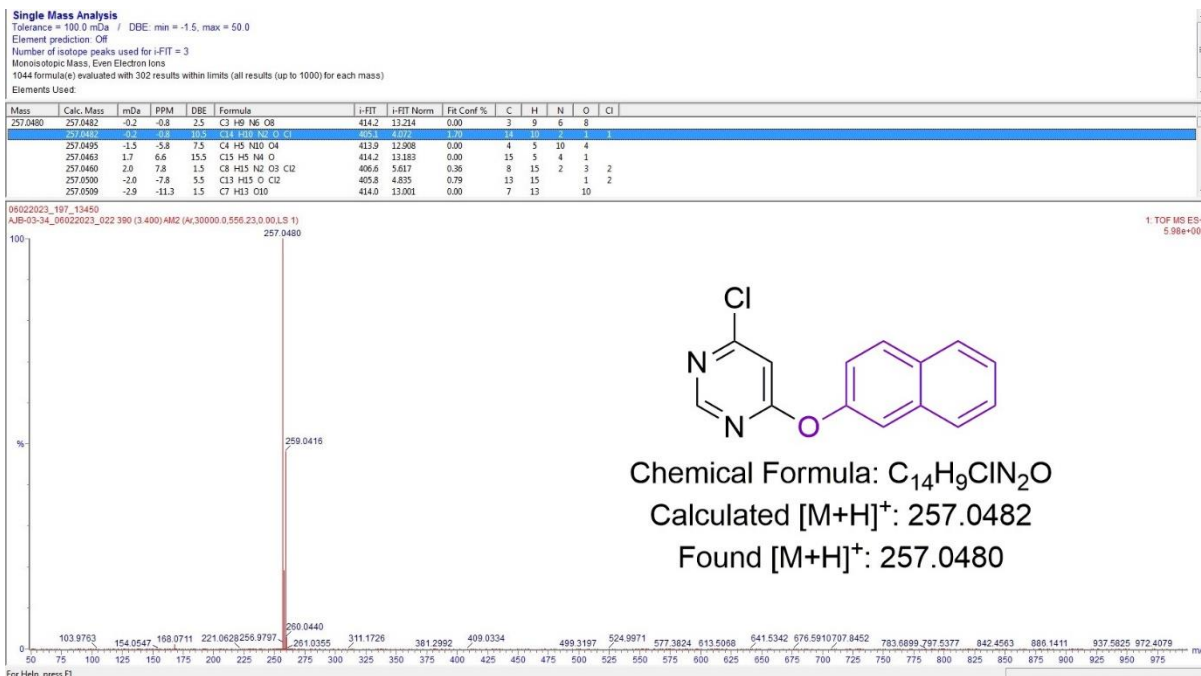

**Fig. S48:** HRMS spectra of **3r**

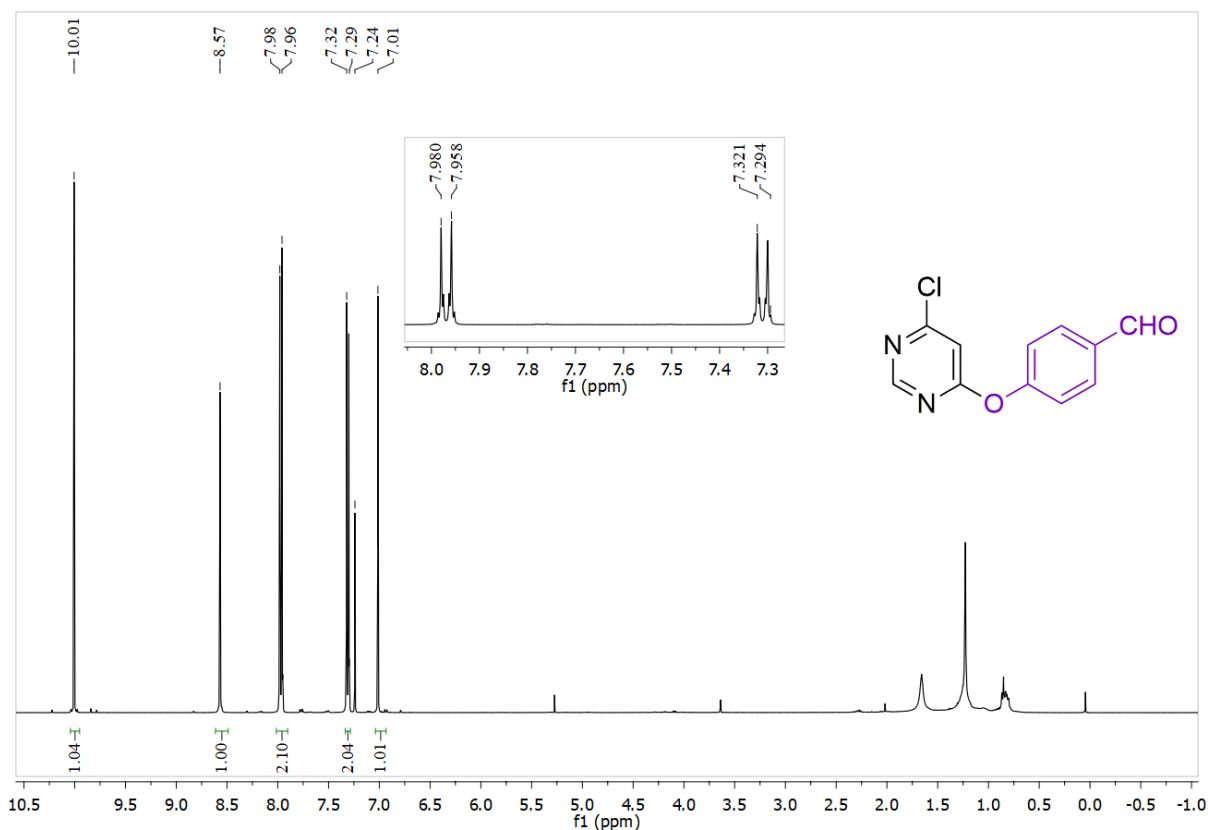

**Fig. S49:** <sup>1</sup>H NMR (400 MHz) spectra of **3s**



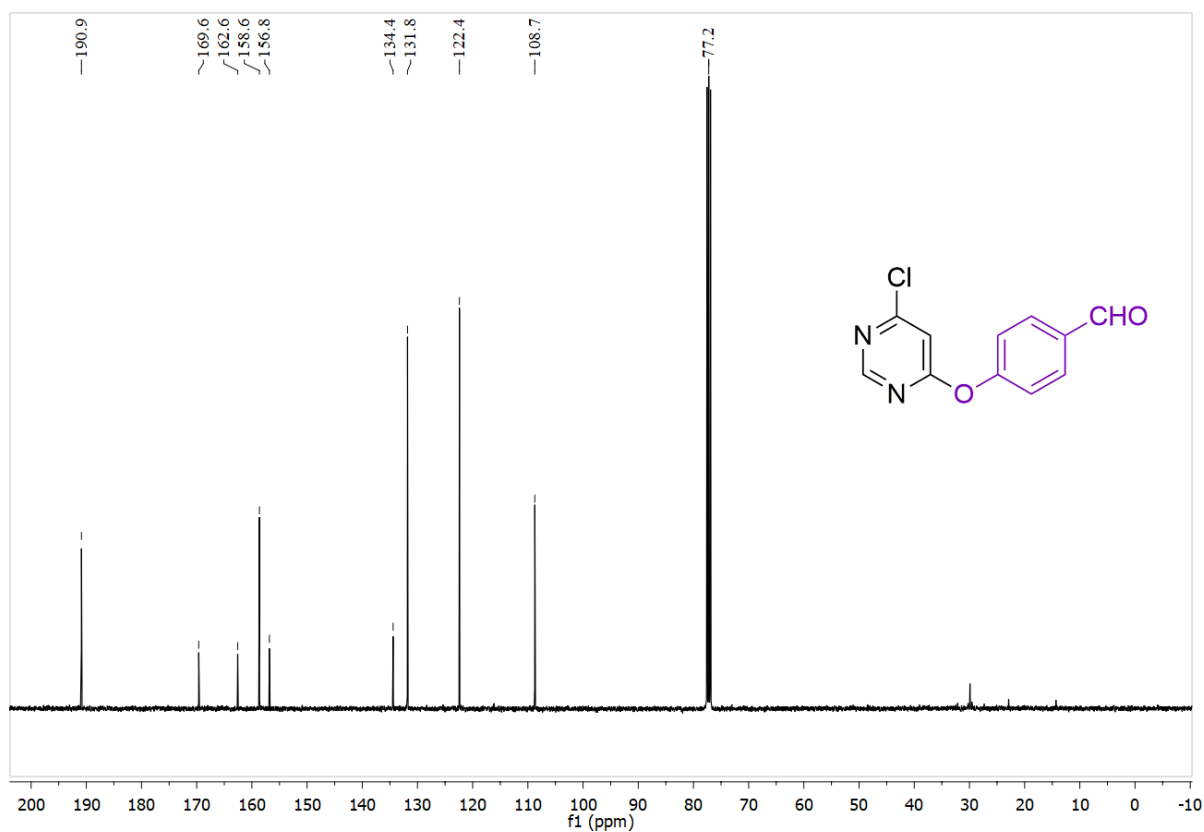

Fig. S50:  $^{13}\text{C}\{^1\text{H}\}$  NMR (100 MHz) spectra of 3s

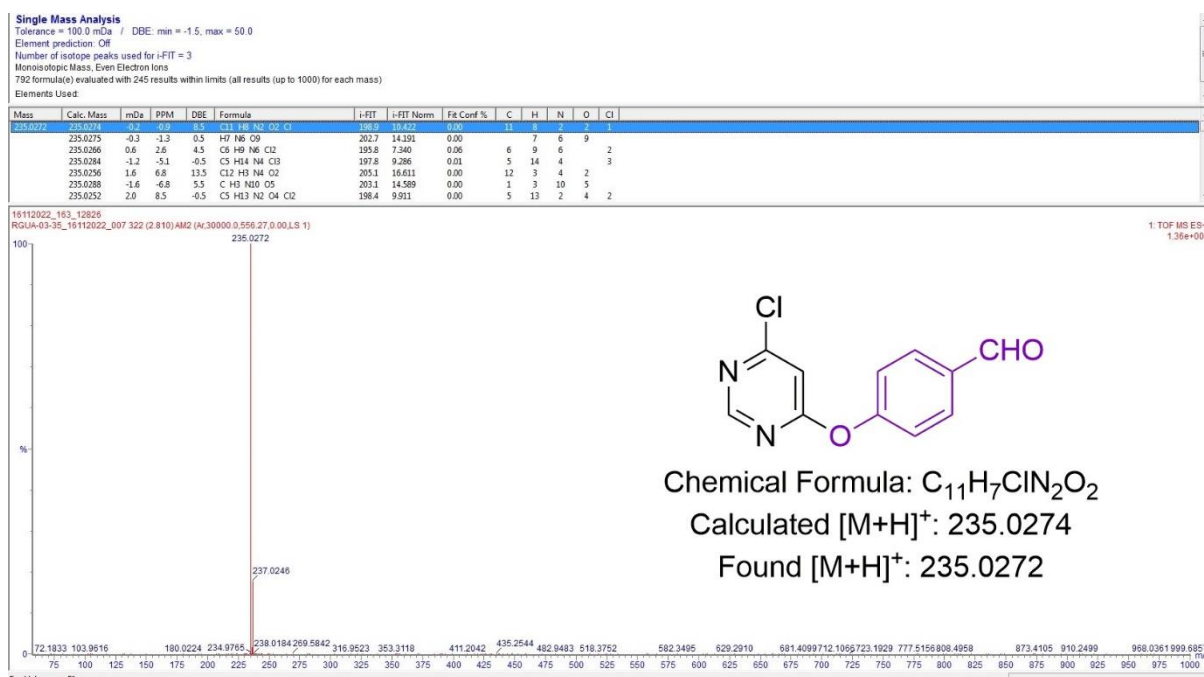

Fig. S51: HRMS spectra of 3s

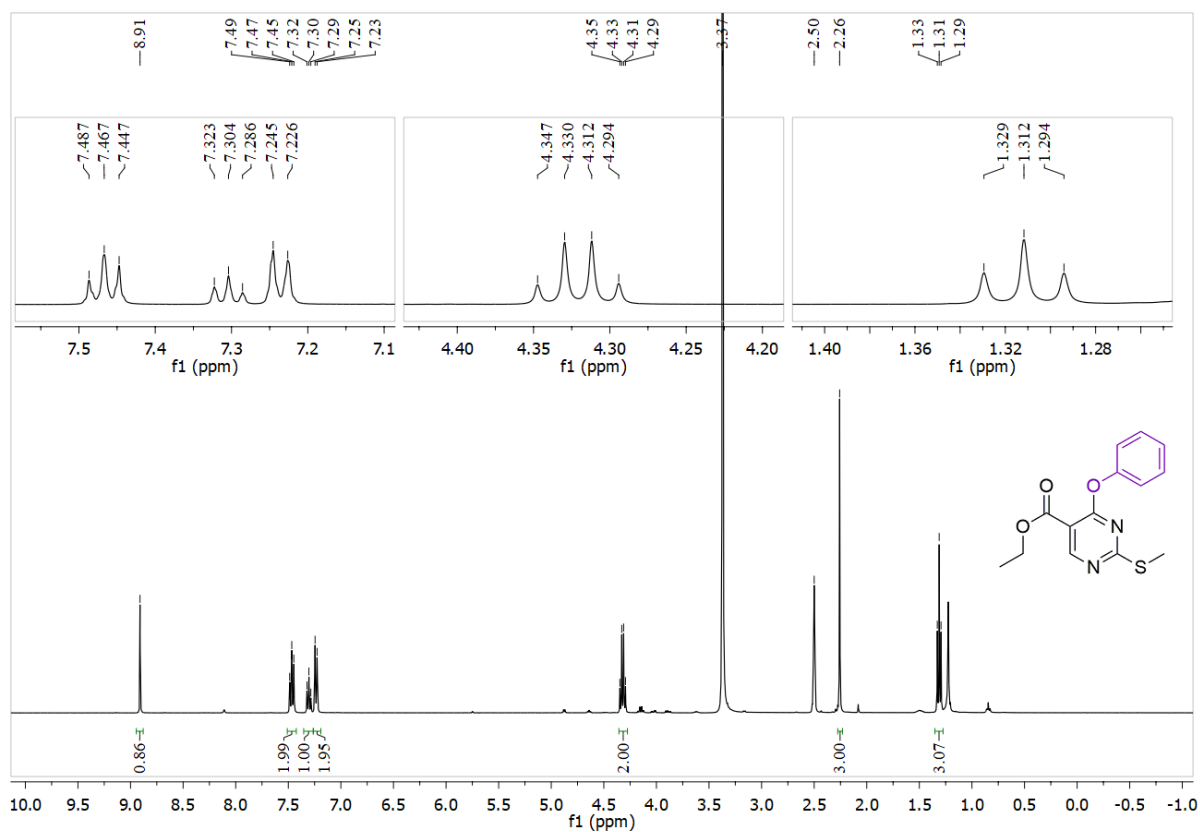

**Fig. S52:**  $^1\text{H}$  NMR (400 MHz) spectra **3t**

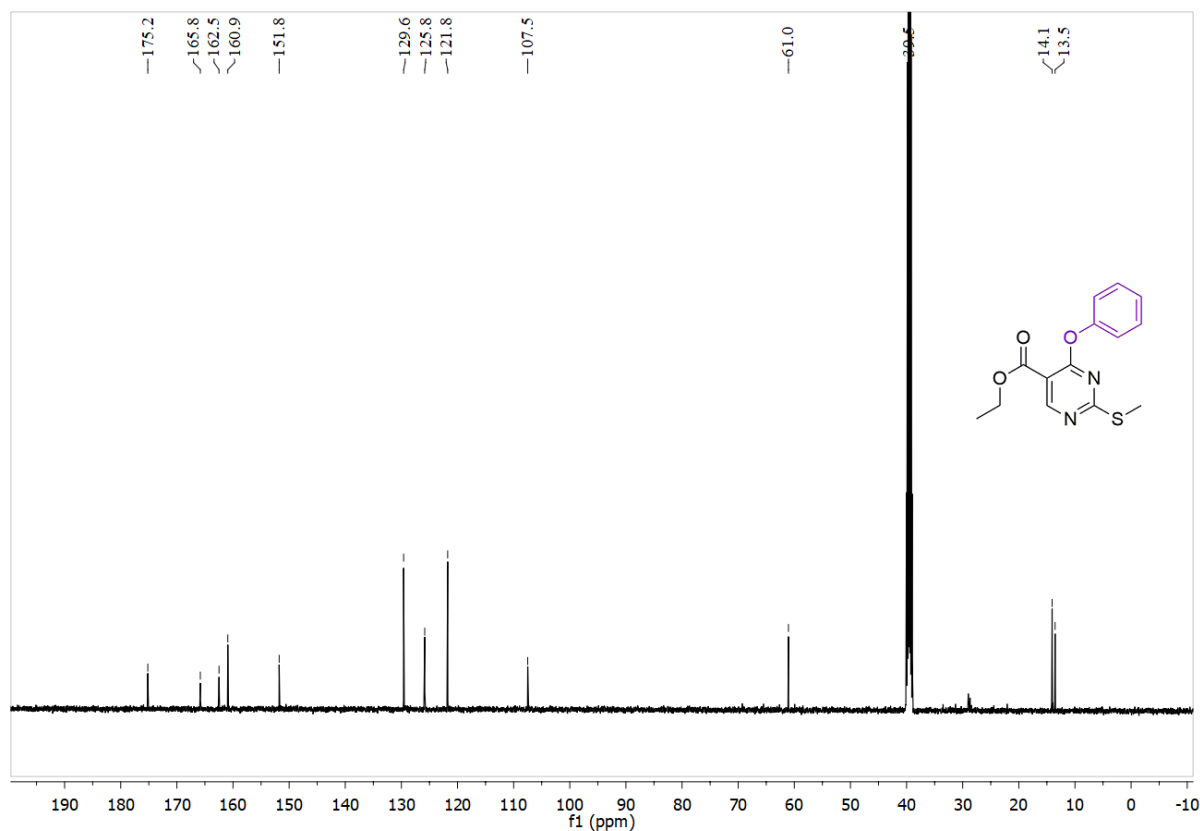

**Fig. S53:**  $^{13}\text{C}\{^1\text{H}\}$  NMR (100 MHz) spectra of **3t**

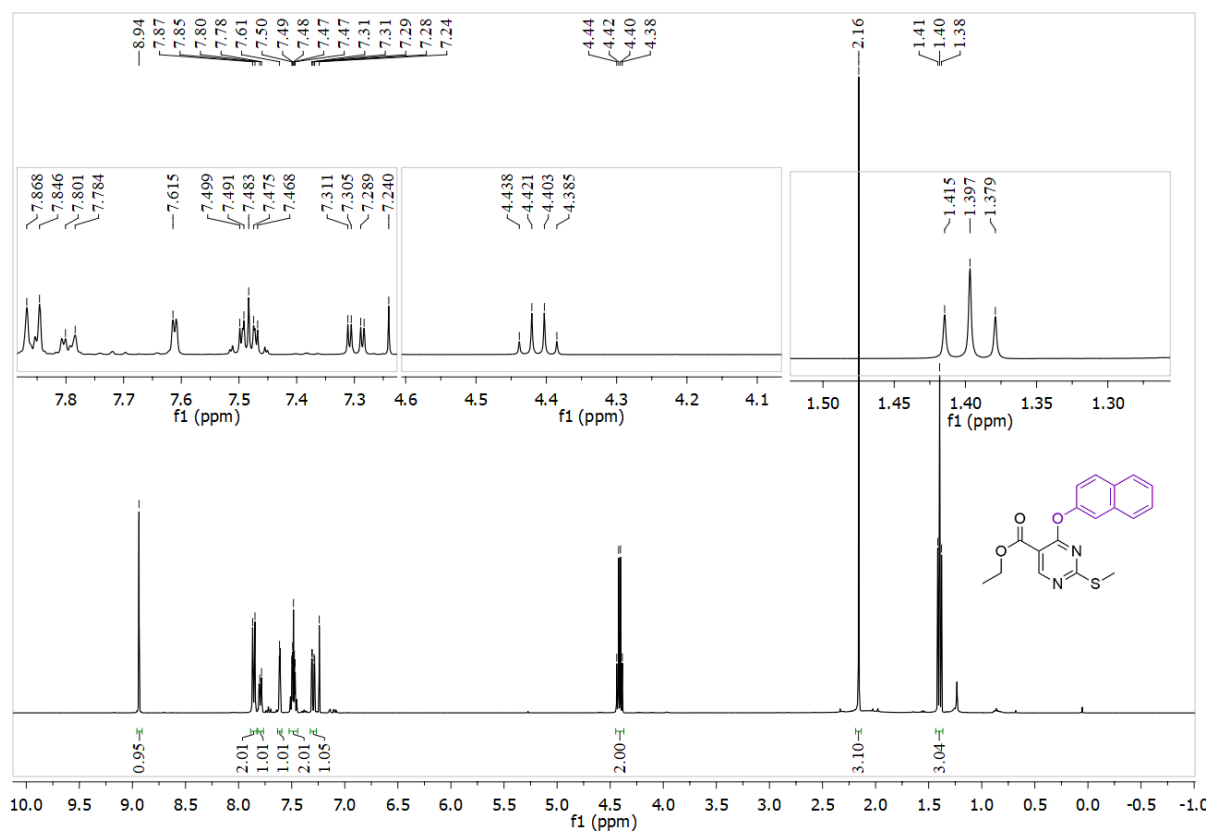

**Fig. S54:**  $^1\text{H}$  NMR (400 MHz) spectra **3u**

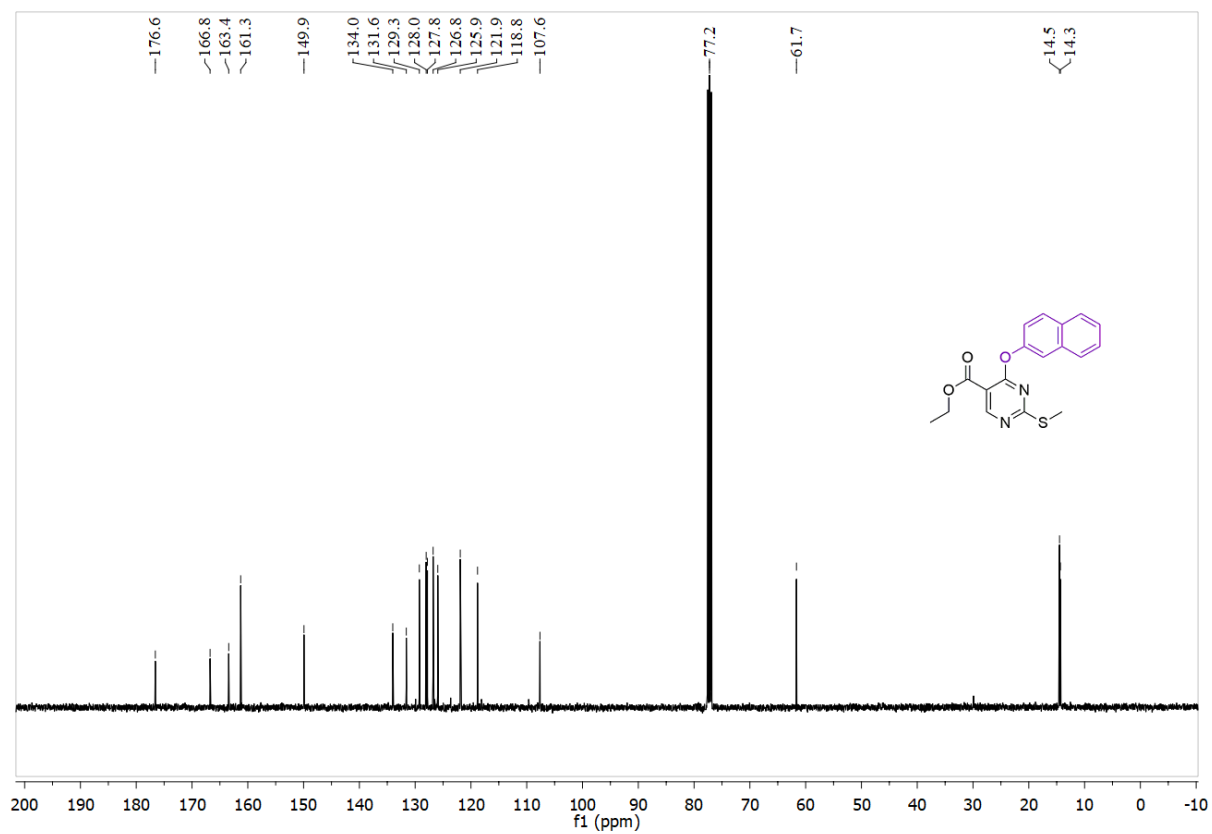

**Fig. S55:**  $^{13}\text{C}\{^1\text{H}\}$  NMR (100 MHz) spectra of **3u**

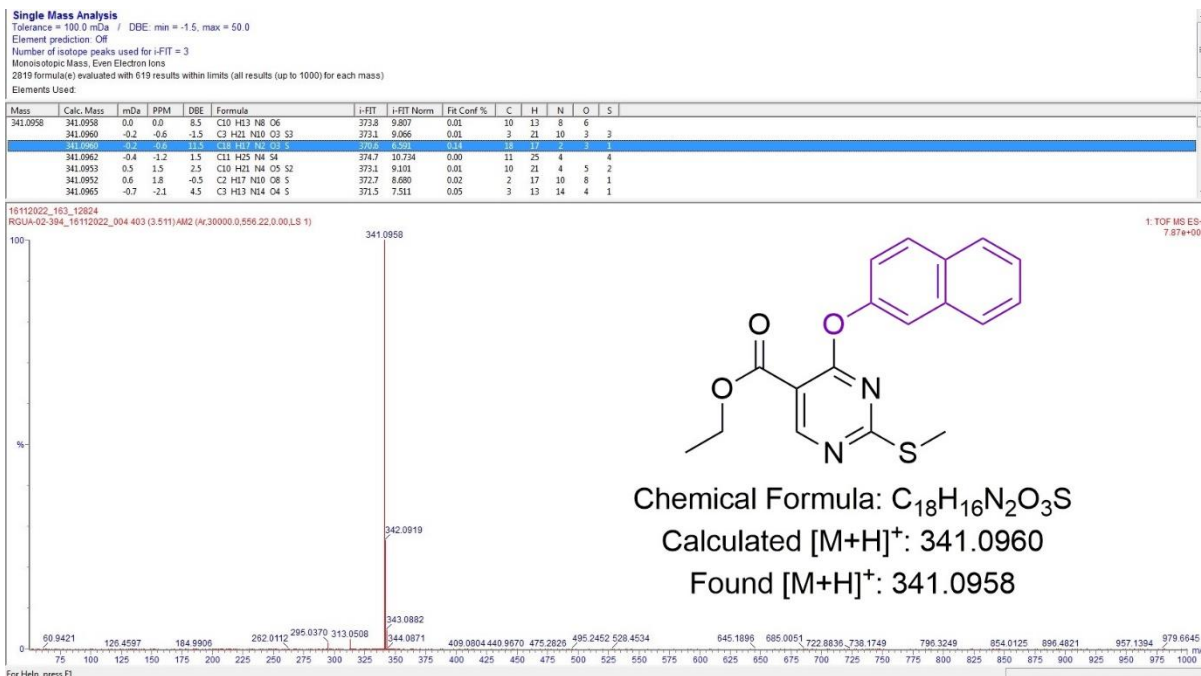

**Fig. S56: HRMS spectra of 3u**

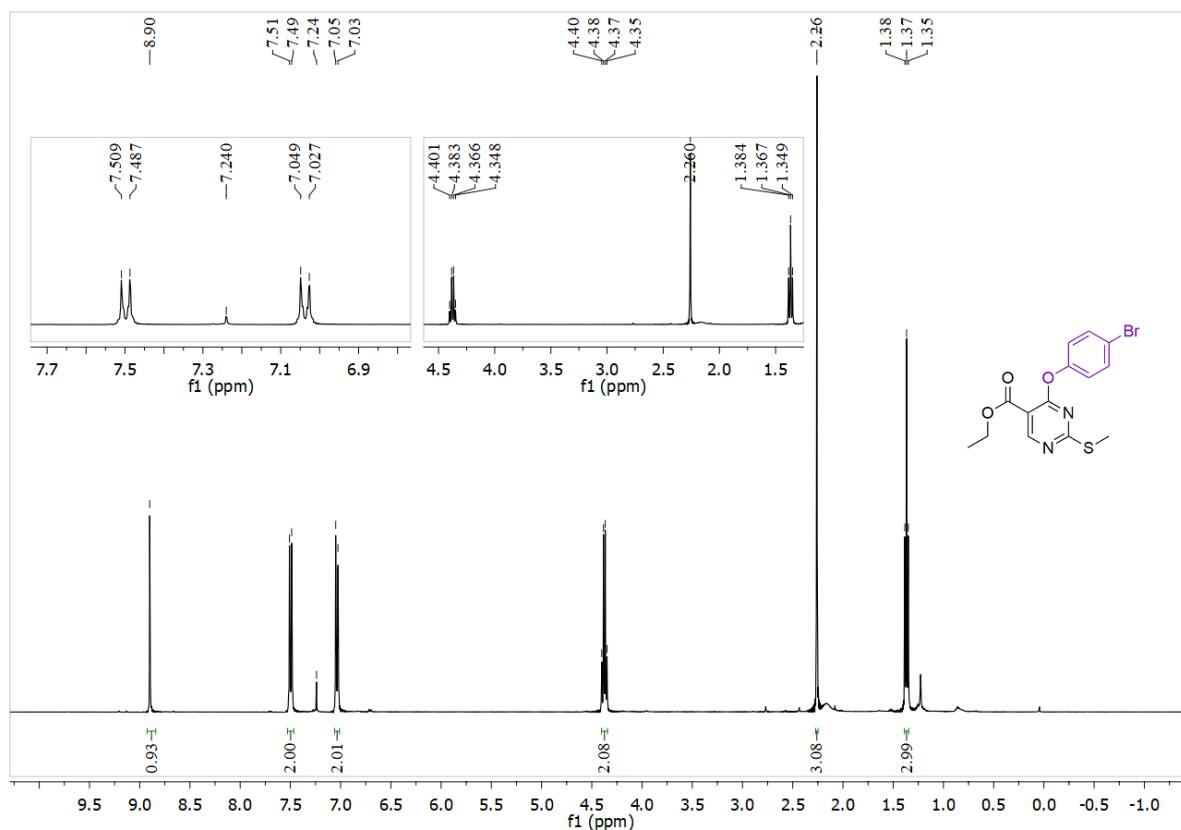

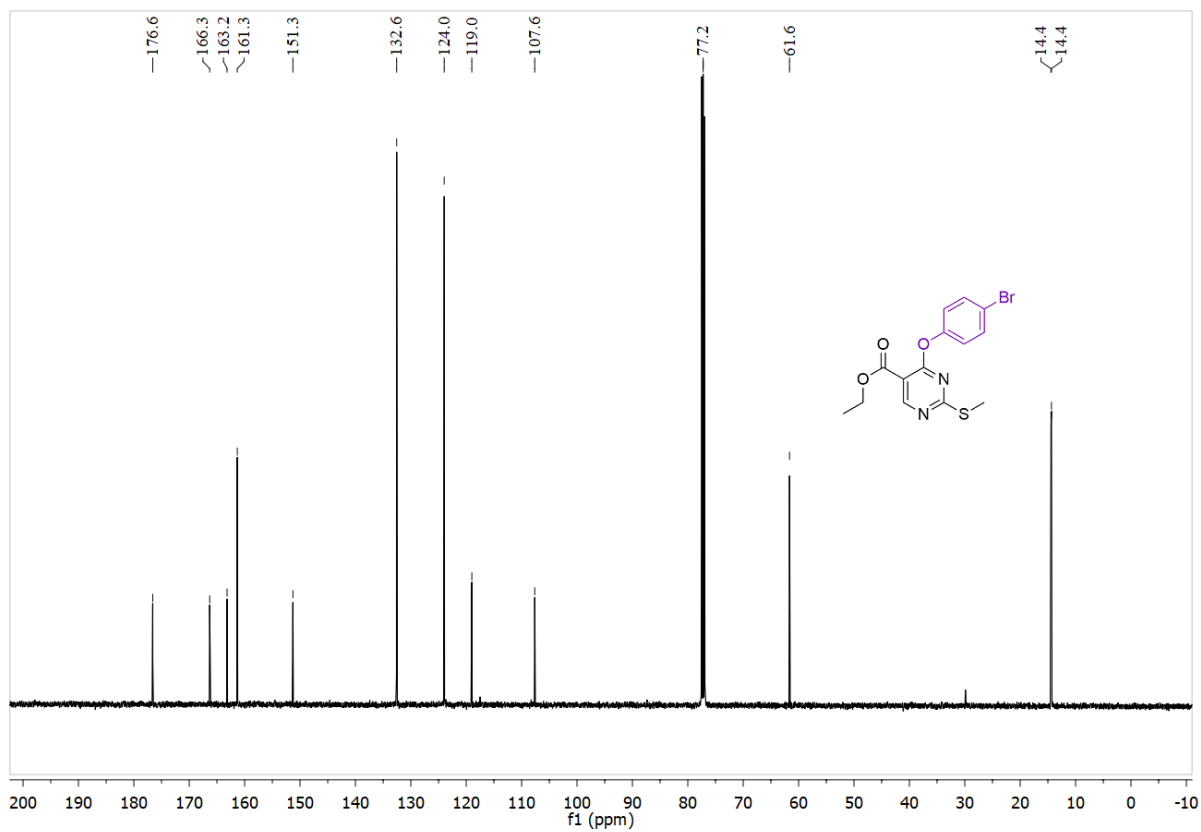

**Fig. S58:**  $^{13}\text{C}\{^1\text{H}\}$  NMR (100 MHz) spectra of **3v**

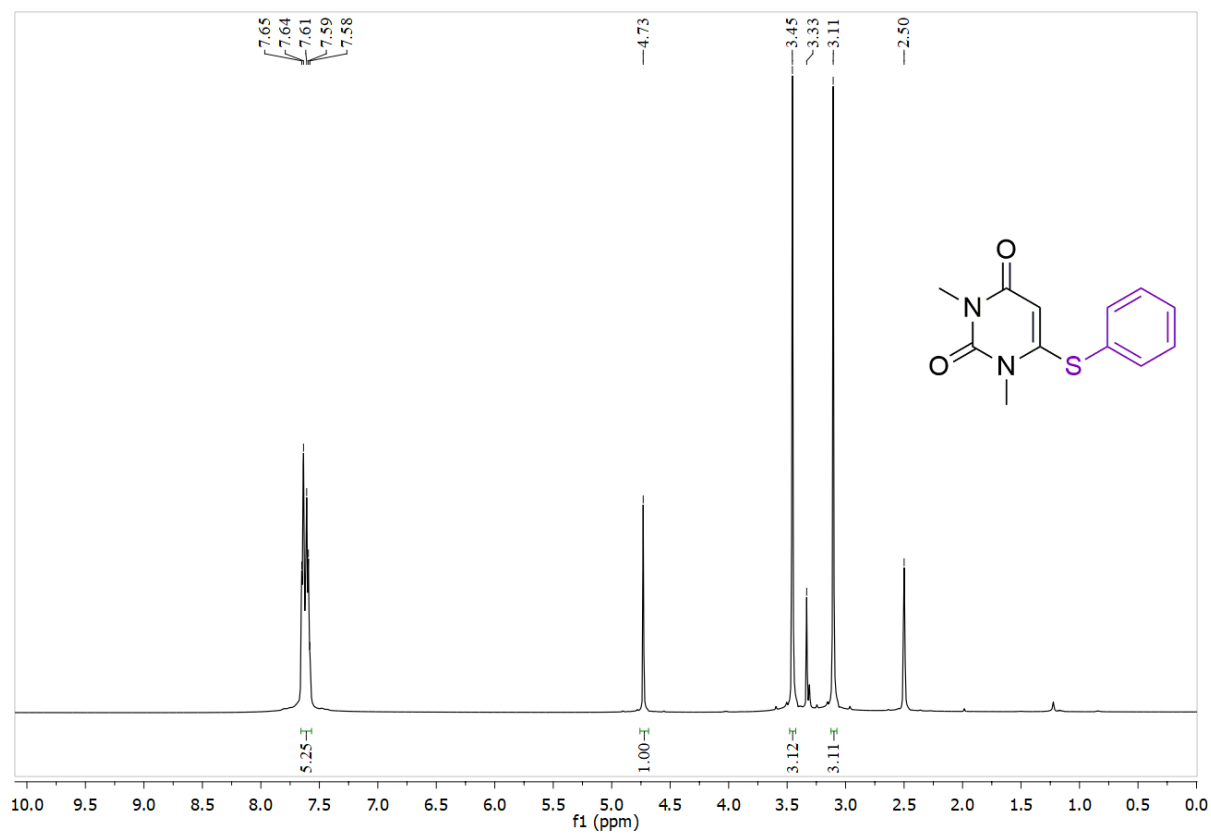

**Fig. S59:**  $^1\text{H}$  NMR (400 MHz) spectra **3w**

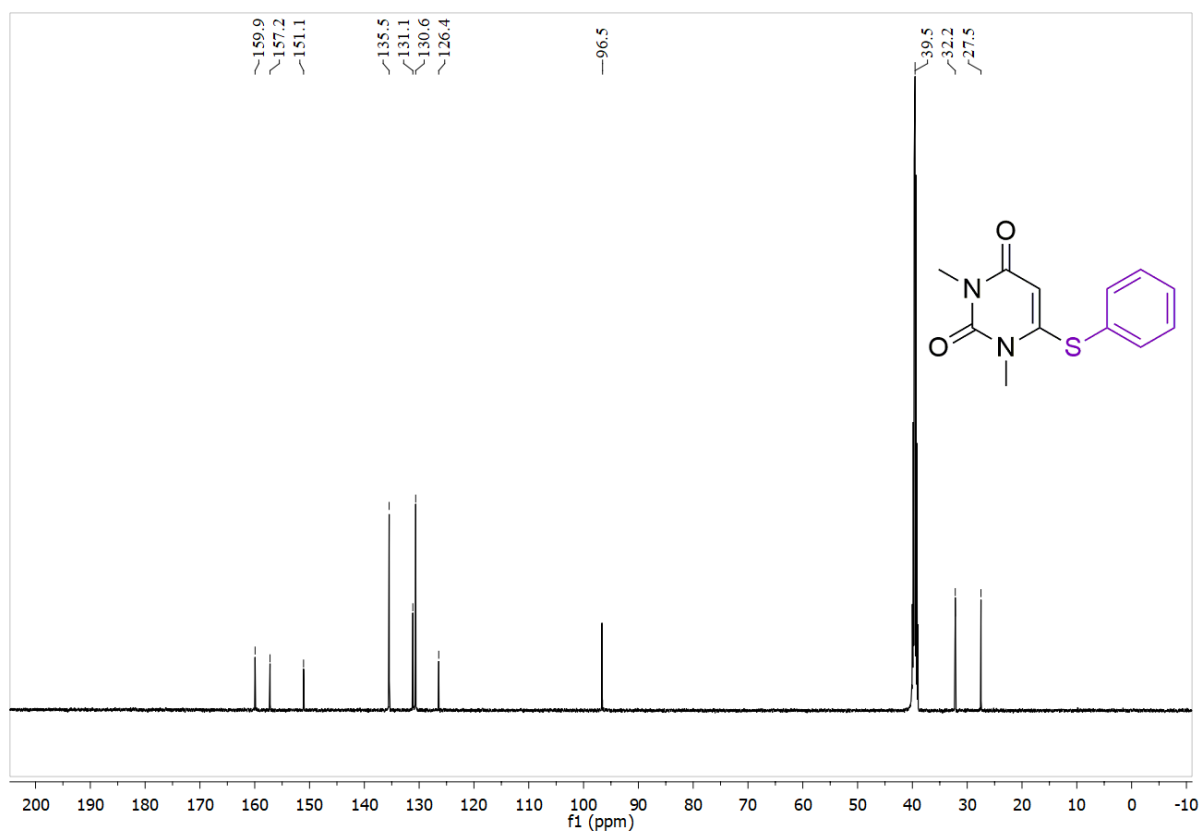

Fig. S60:  $^{13}\text{C}\{^1\text{H}\}$  NMR (100 MHz) spectra of **3w**

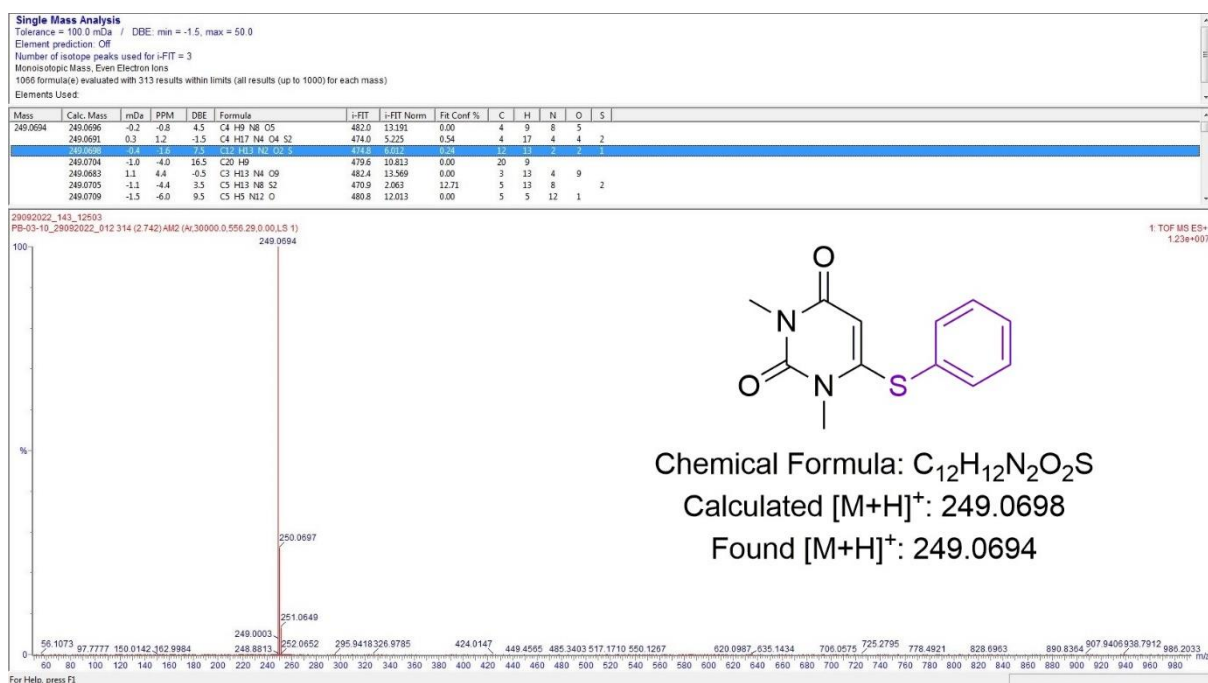

Fig. S61: HRMS spectra of **3w**

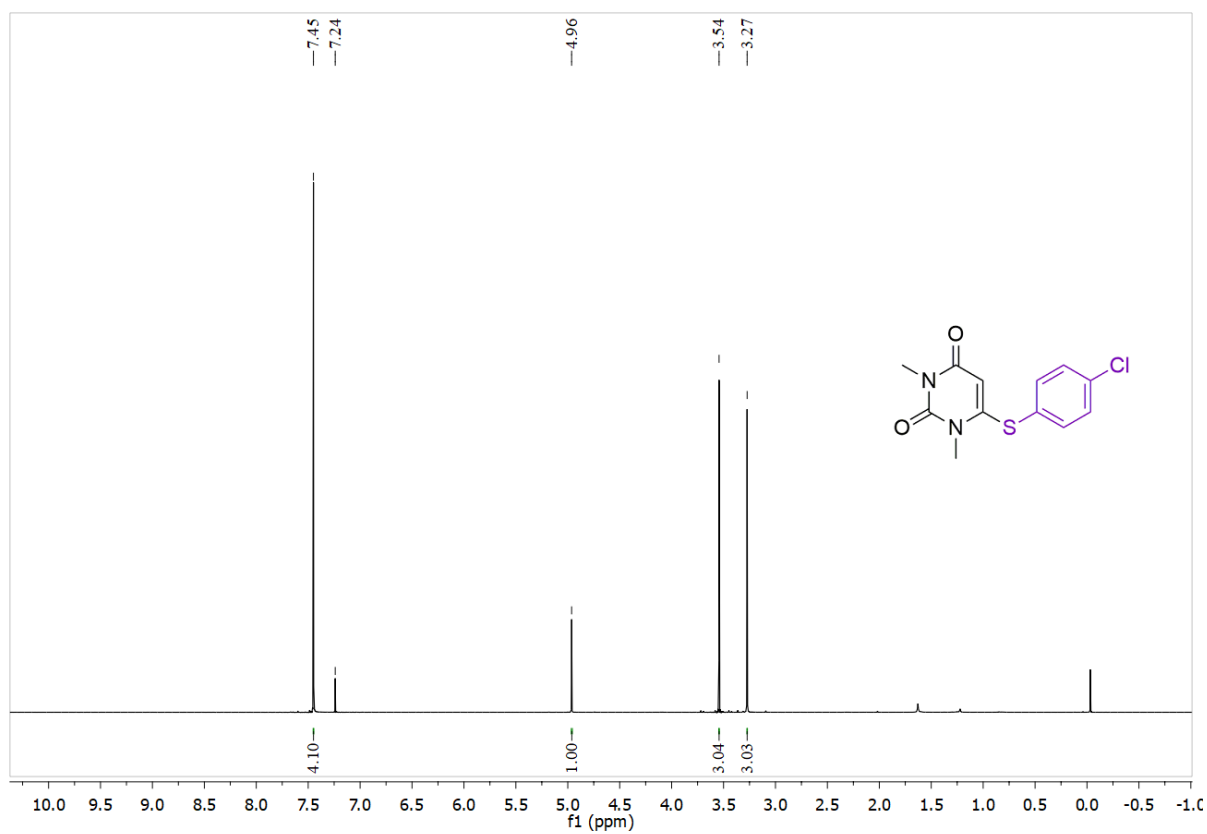

**Fig. S62:**  $^1\text{H}$  NMR (400 MHz) spectra **3x**

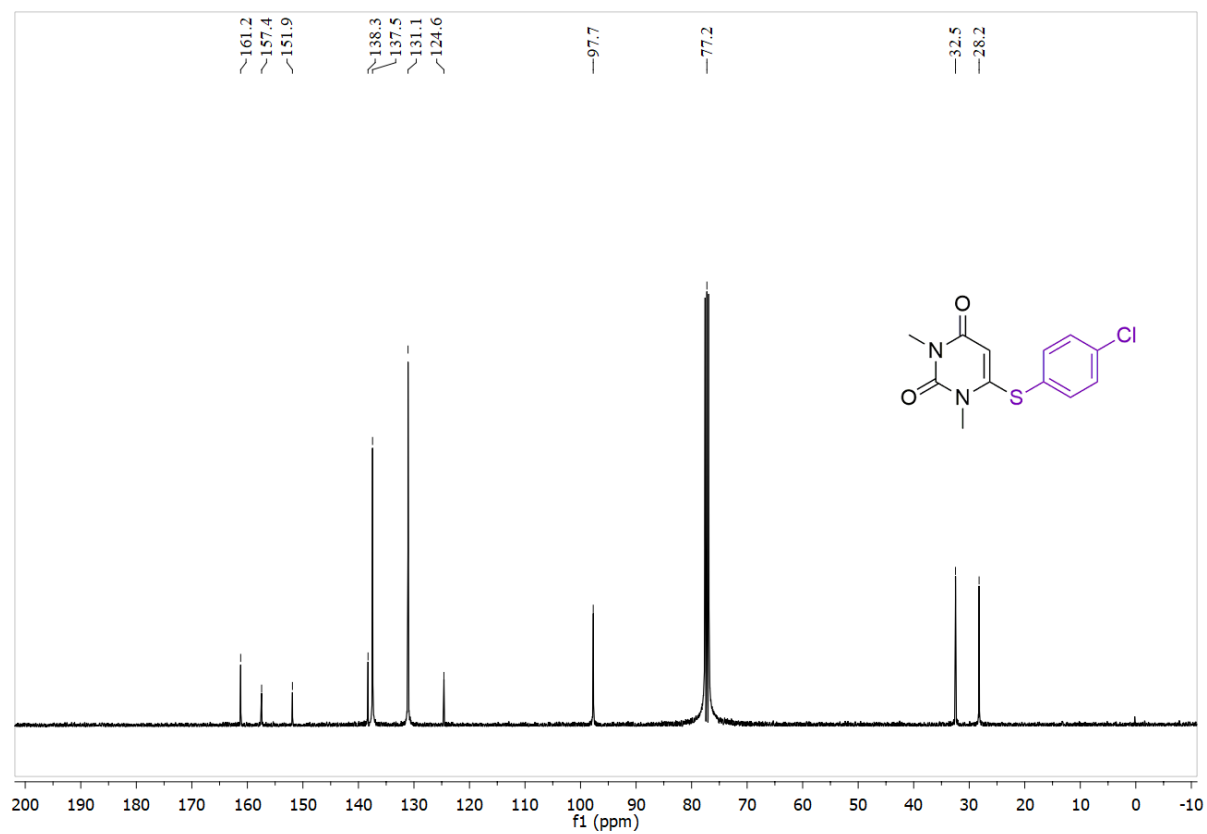

**Fig. S63:**  $^{13}\text{C}\{^1\text{H}\}$  NMR (100 MHz) spectra of **3x**

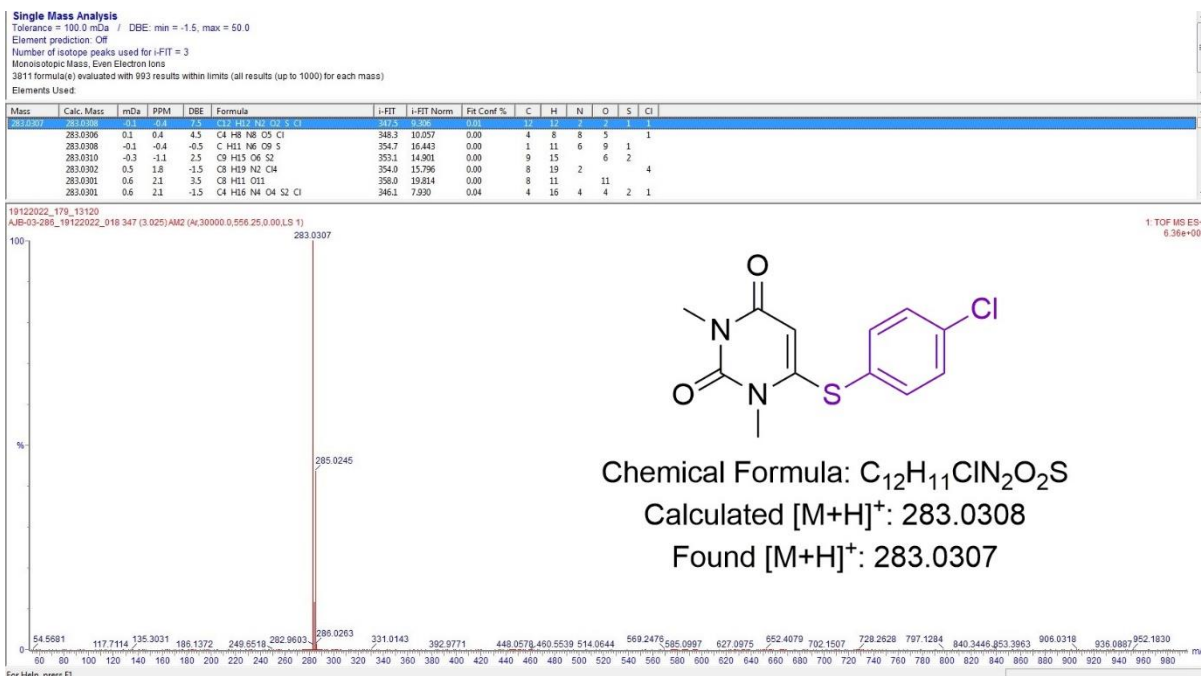

**Fig. S64:** HRMS spectra of **3x**

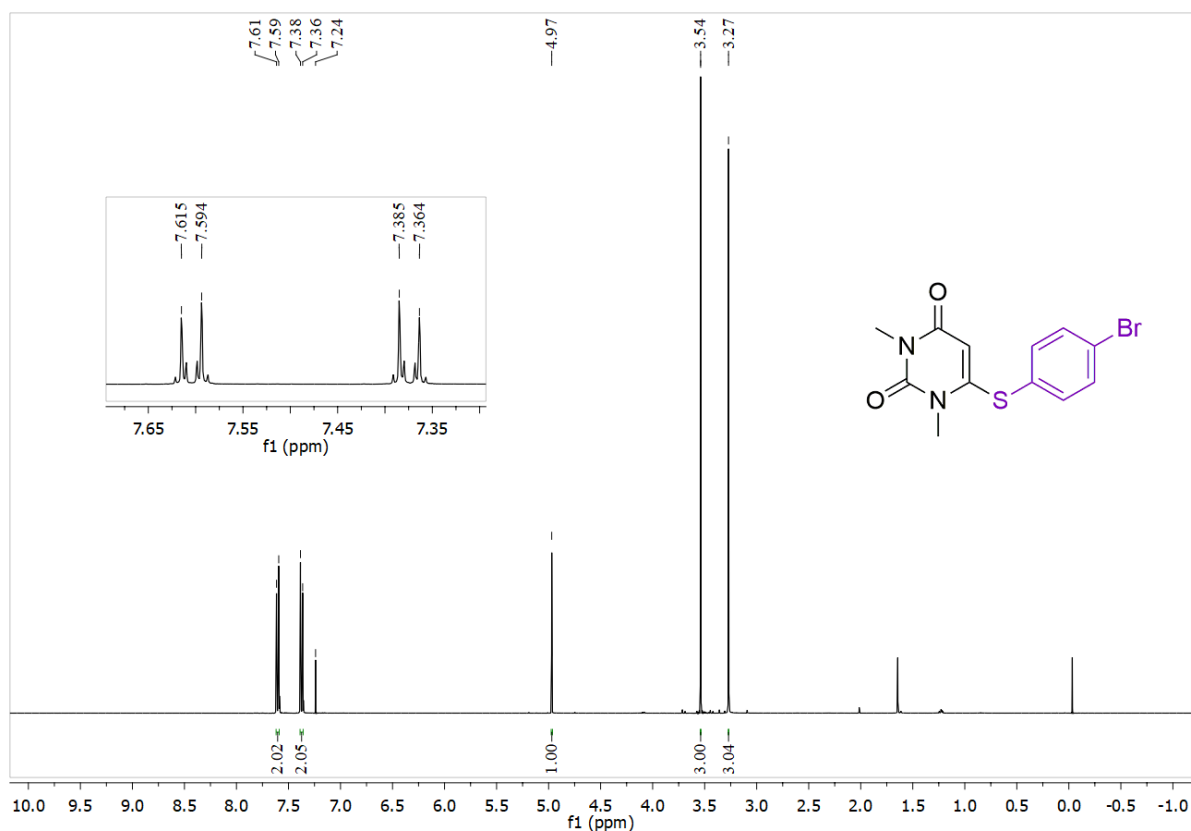



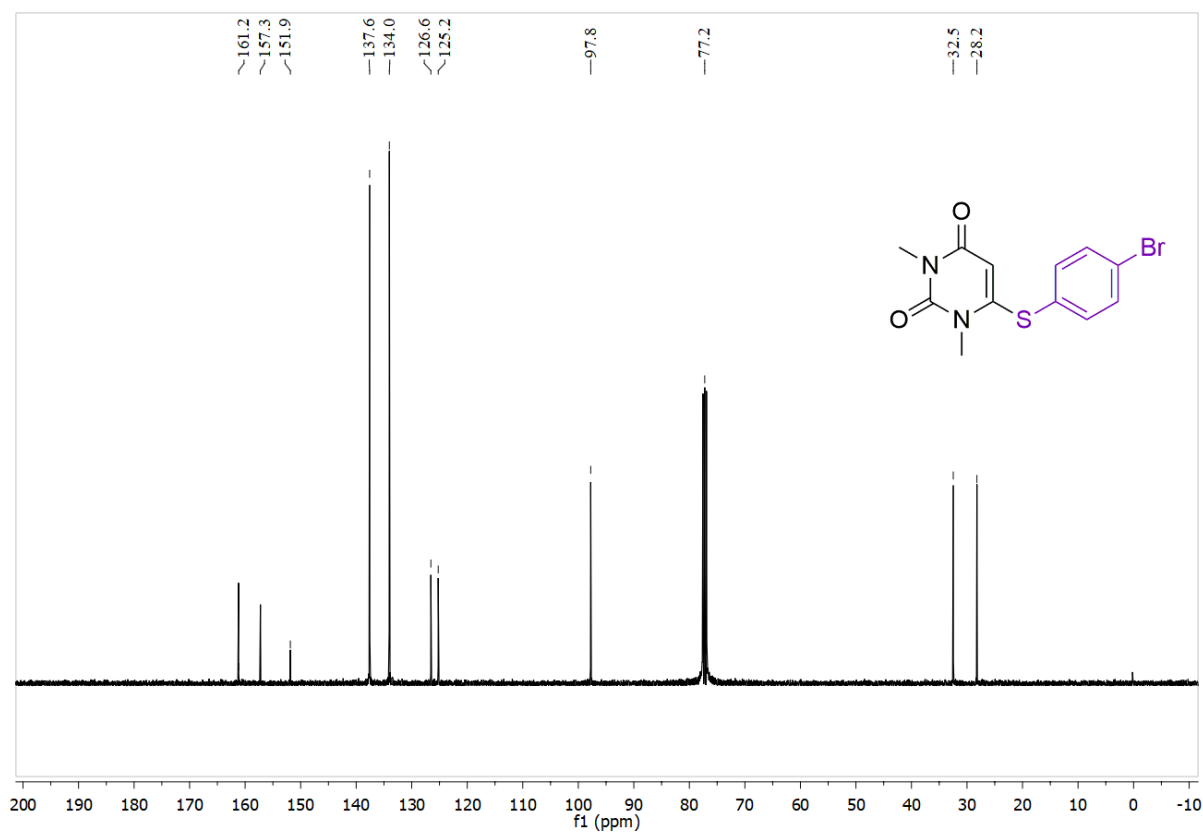

Fig. S66:  $^{13}\text{C}\{^1\text{H}\}$  NMR (100 MHz) spectra of **3y**

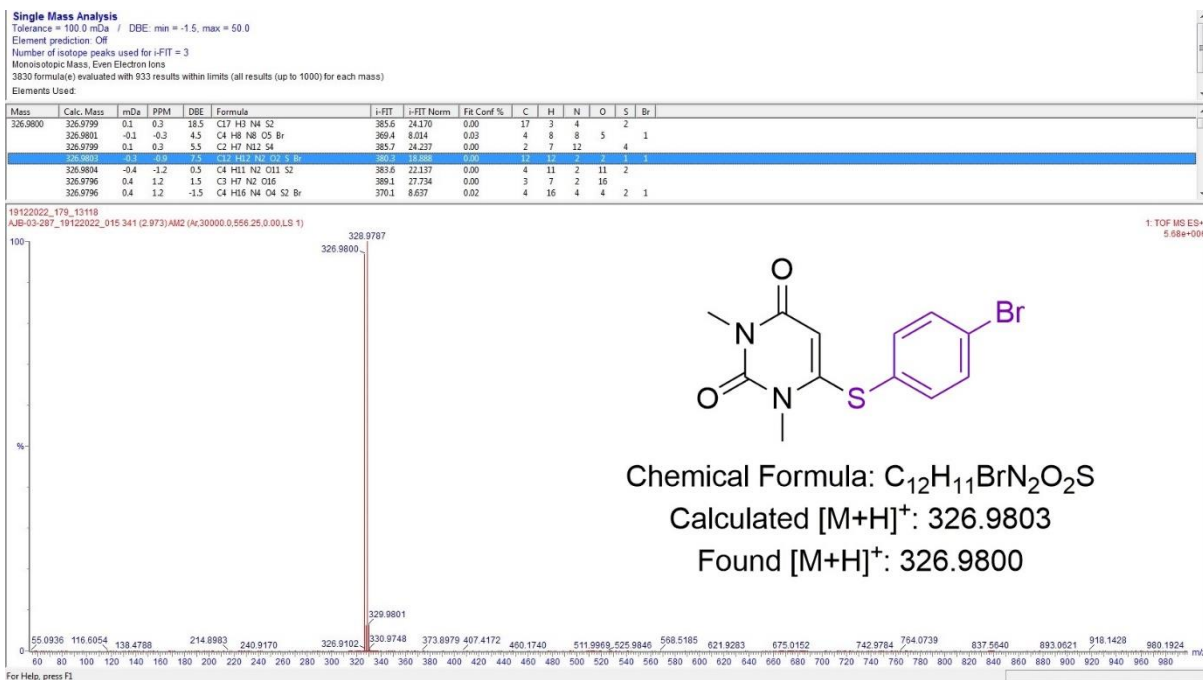

Fig. S67: HRMS spectra of **3y**

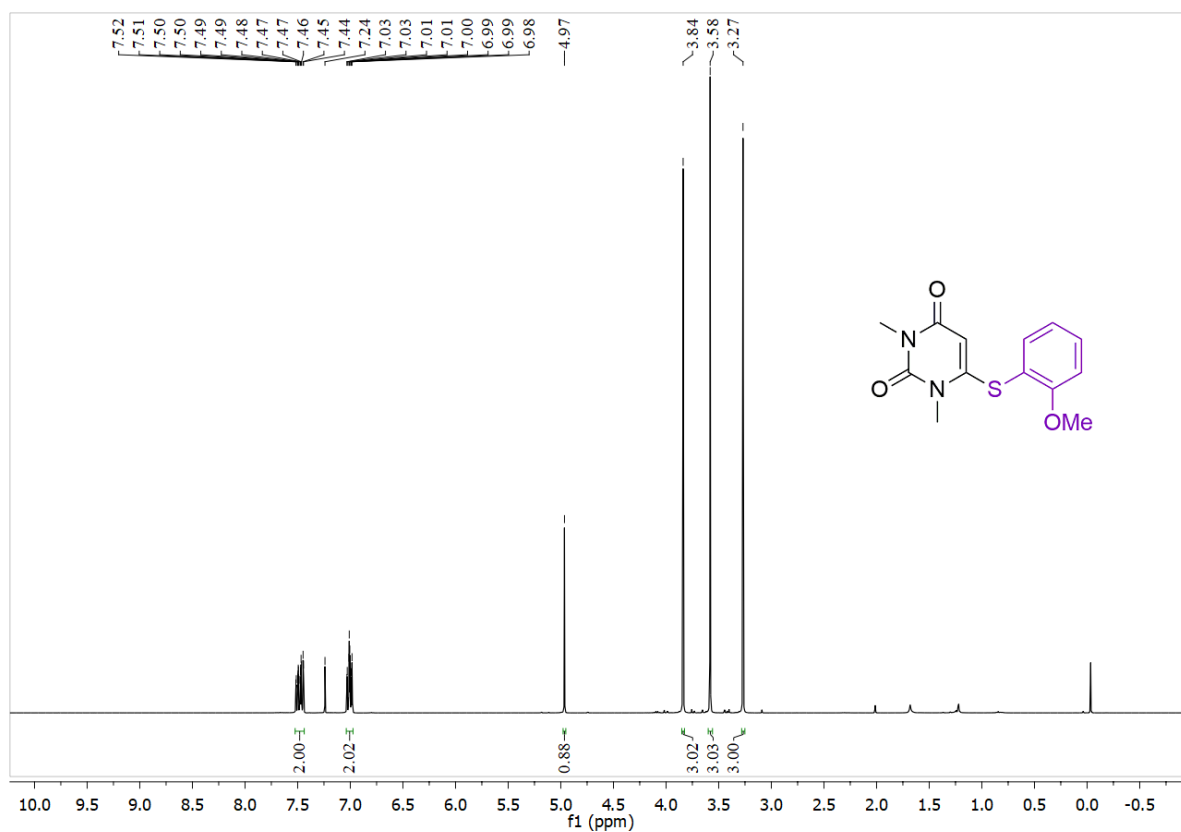

**Fig. S68:**  $^1\text{H}$  NMR (400 MHz) spectra **3z**

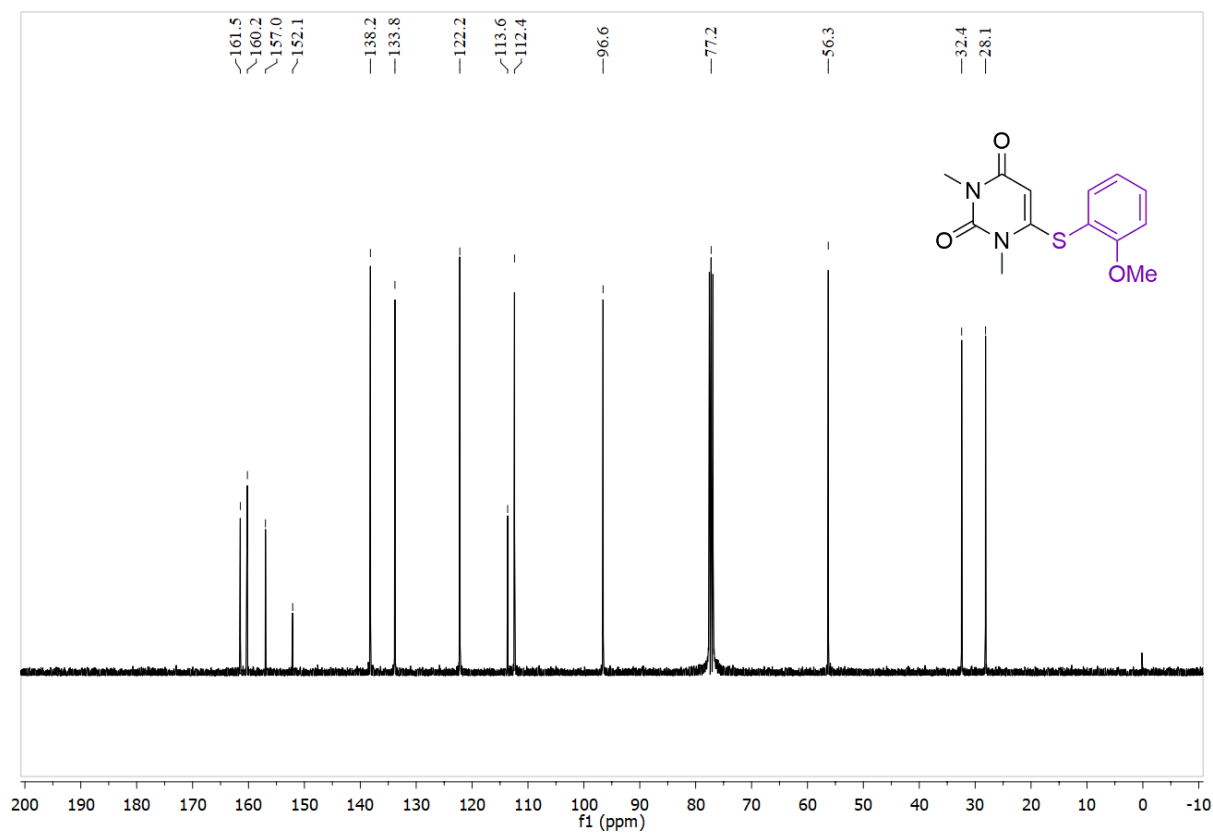

**Fig. S69:**  $^{13}\text{C}\{^1\text{H}\}$  NMR (100 MHz) spectra of **3z**

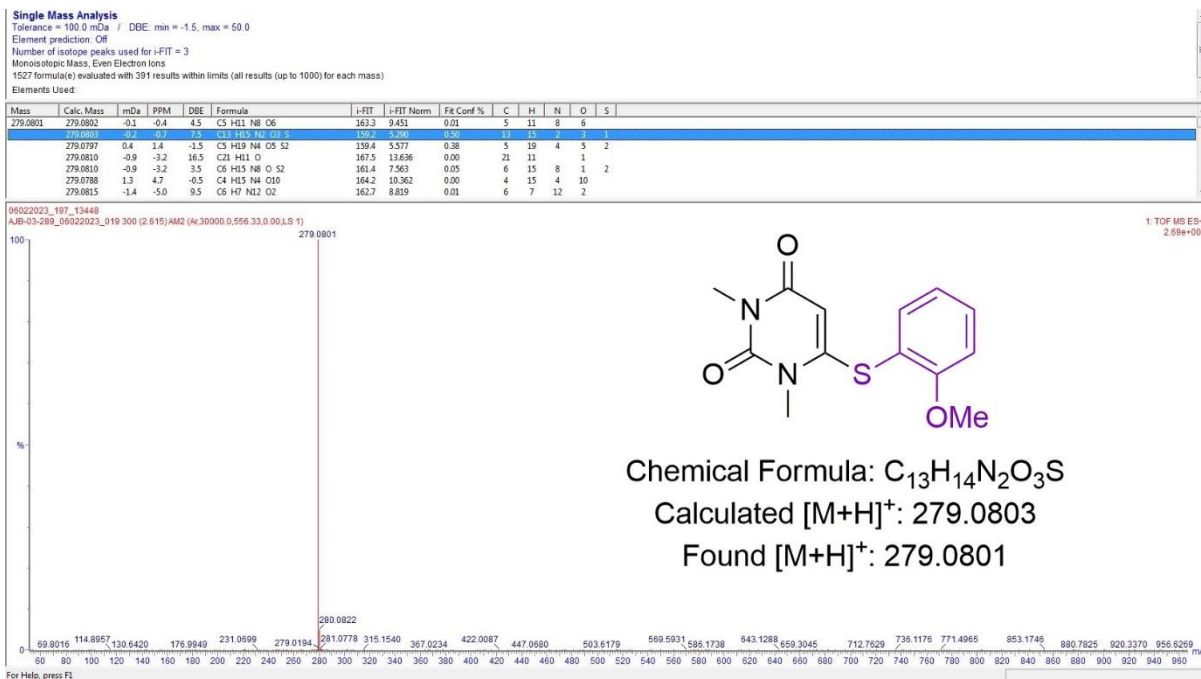

**Fig. S70:** HRMS spectra of **3z**

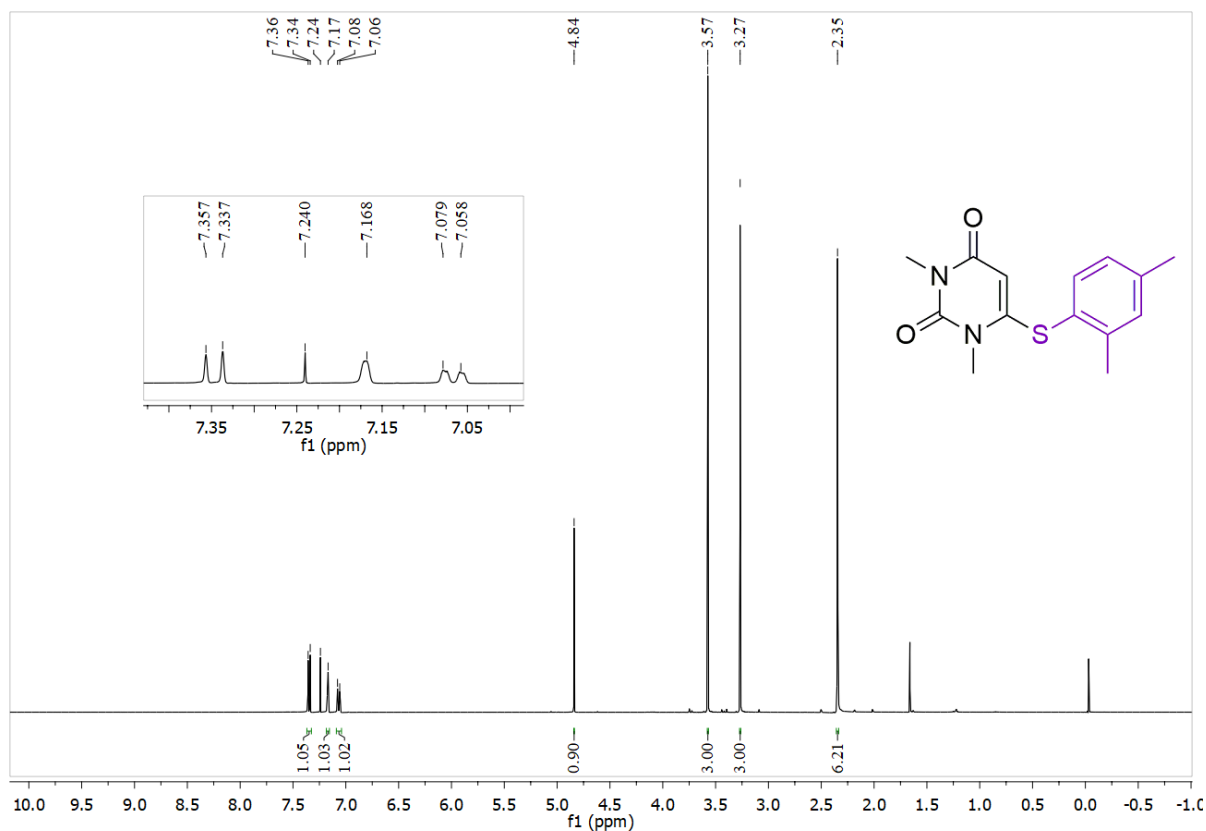

**Fig. S71:** <sup>1</sup>H NMR (400 MHz) spectra **3aa**

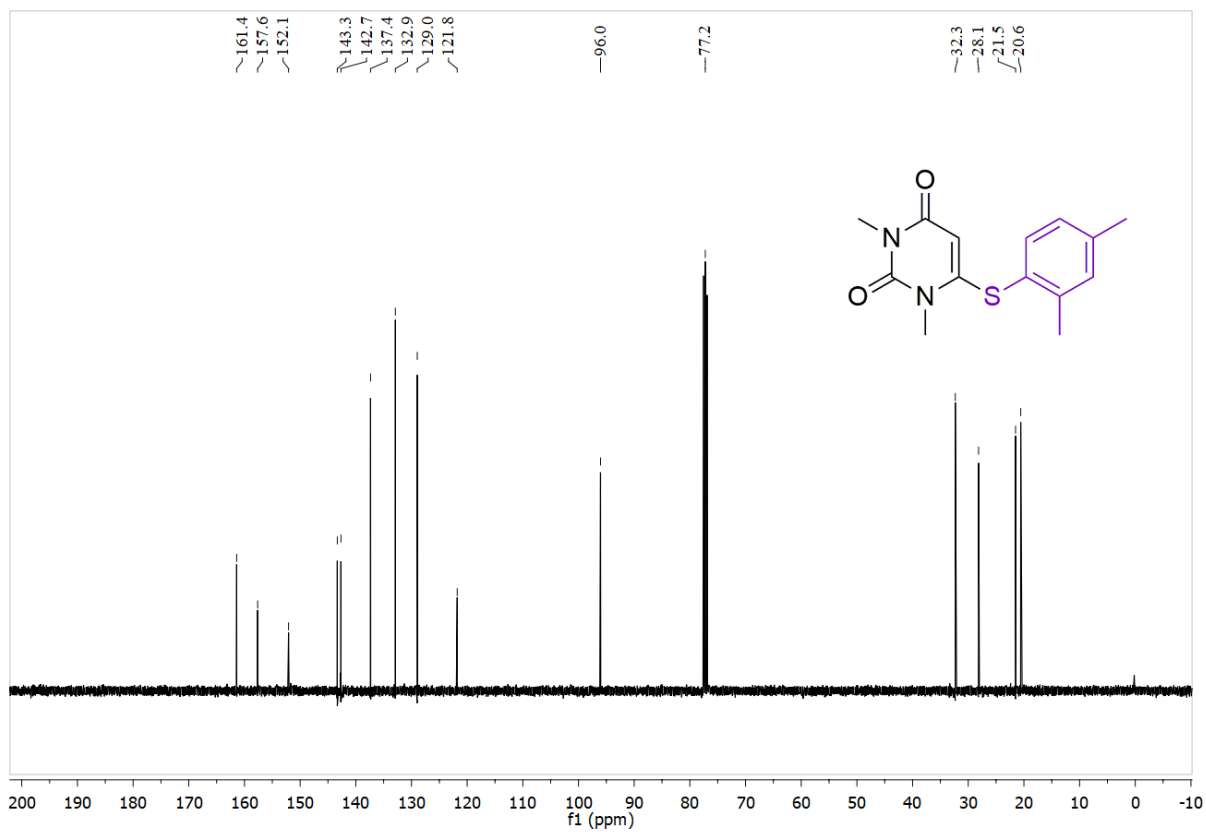

**Fig. S72:**  $^{13}\text{C}\{^1\text{H}\}$  NMR (100 MHz) spectra of **3aa**

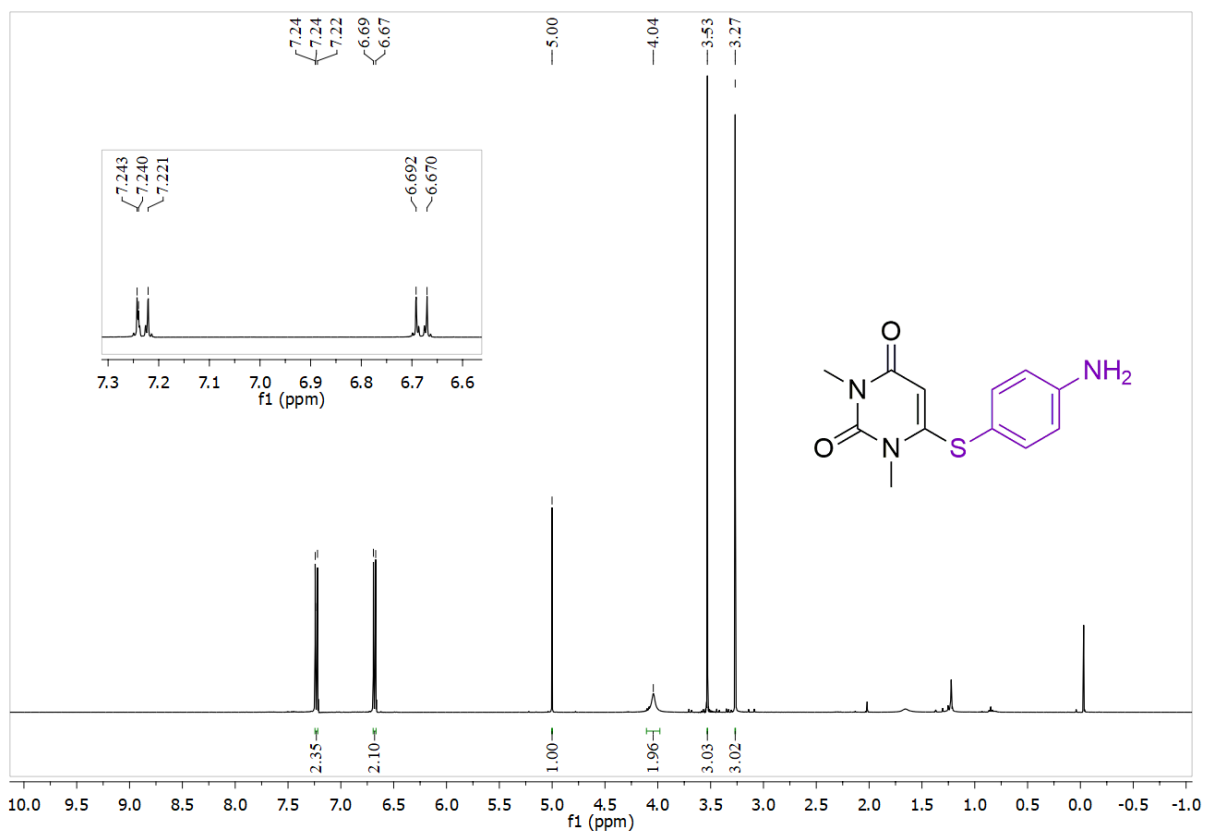

**Fig. S73:**  $^1\text{H}$  NMR (400 MHz) spectra **3ab**

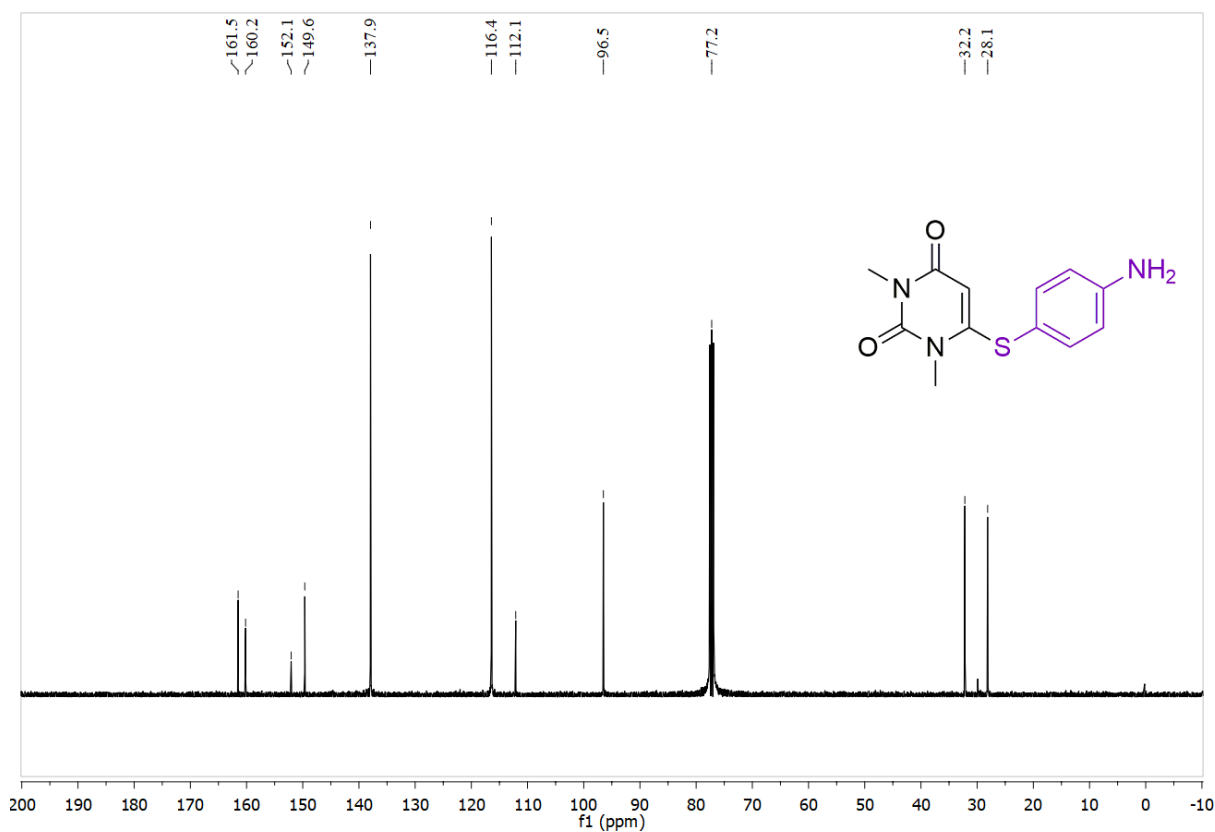

Fig. S74:  $^{13}\text{C}\{^1\text{H}\}$  NMR (100 MHz) spectra of **3ab**

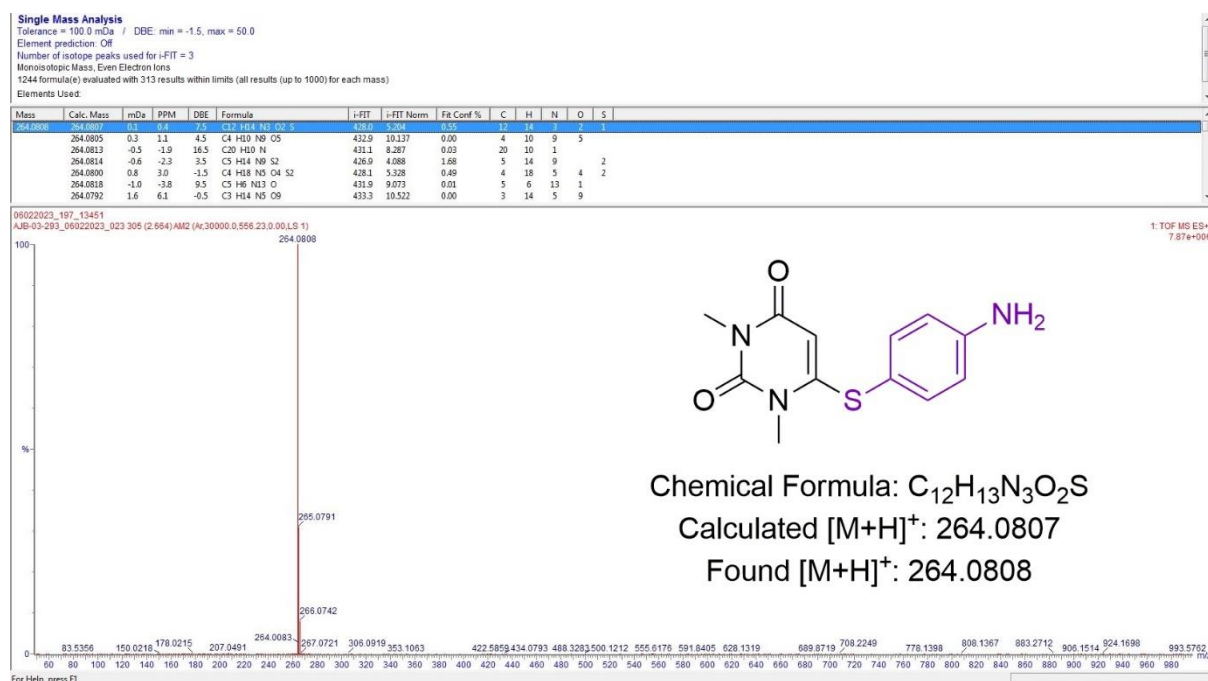

Fig. S75: HRMS spectra of **3ab**

### 3. X-ray crystallographic information

**Table S1: Crystal data and structure refinement for compound 1**

| Identification code                                          | Compound 1                                                                       |
|--------------------------------------------------------------|----------------------------------------------------------------------------------|
| Empirical formula                                            | C <sub>29</sub> H <sub>44</sub> Cu <sub>1.5</sub> IN <sub>8</sub> O <sub>5</sub> |
| Formula weight                                               | 806.93                                                                           |
| Temperature/K                                                | 293(2)                                                                           |
| Crystal system                                               | triclinic                                                                        |
| Space group                                                  | <i>P</i> -1                                                                      |
| <i>a</i> /Å                                                  | 10.2357(4)                                                                       |
| <i>b</i> /Å                                                  | 12.1215(5)                                                                       |
| <i>c</i> /Å                                                  | 14.9718(6)                                                                       |
| $\alpha$ /°                                                  | 76.079(2)                                                                        |
| $\beta$ /°                                                   | 80.501(2)                                                                        |
| $\gamma$ /°                                                  | 79.118(2)                                                                        |
| Volume/Å <sup>3</sup>                                        | 1756.60(12)                                                                      |
| <i>Z</i>                                                     | 2                                                                                |
| $\rho_{\text{calc}}$ /cm <sup>3</sup>                        | 1.526                                                                            |
| $\mu$ /mm <sup>-1</sup>                                      | 1.842                                                                            |
| <i>F</i> (000)                                               | 821.0                                                                            |
| Radiation                                                    | MoK $\alpha$ ( $\lambda$ = 0.71073)                                              |
| 2 $\Theta$ range for data collection/°                       | 2.824 to 56.982                                                                  |
| Index ranges                                                 | -13 ≤ <i>h</i> ≤ 13, -16 ≤ <i>k</i> ≤ 16, -19 ≤ <i>l</i> ≤ 19                    |
| Reflections collected                                        | 63410                                                                            |
| Independent reflections                                      | 8771 [ <i>R</i> <sub>int</sub> = 0.0608, <i>R</i> <sub>sigma</sub> = 0.0433]     |
| Data/restraints/parameters                                   | 8771/0/380                                                                       |
| Goodness-of-fit on <i>F</i> <sup>2</sup>                     | 1.044                                                                            |
| Final <i>R</i> indexes [ <i>I</i> ≥ 2 $\sigma$ ( <i>I</i> )] | <i>R</i> <sub>1</sub> = 0.0454, <i>wR</i> <sub>2</sub> = 0.1110                  |
| Final <i>R</i> indexes [all data]                            | <i>R</i> <sub>1</sub> = 0.0732, <i>wR</i> <sub>2</sub> = 0.1243                  |
| Largest diff. peak/hole / eÅ <sup>-3</sup>                   | 1.02/-1.01                                                                       |

$$^{\dagger}wR2 = +^{1/2}; R1 = \sum ||F_o| - |F_c|| / \sum F_o, *GoodF = S = \{\sum[w(F_o^2 - F_c^2)^2] / (n-p)\}^{1/2}$$

**Table S2. Bond Lengths for compound 1**

| Atom | Atom            | Length/Å    | Atom | Atom             | Length/Å  |
|------|-----------------|-------------|------|------------------|-----------|
| Cu1  | N1              | 2.0289 (15) | C2   | C1               | 1.3900    |
| Cu1  | N1 <sup>1</sup> | 2.0290 (15) | N5   | C15              | 1.3900    |
| Cu1  | O3 <sup>1</sup> | 1.951 (2)   | N5   | C19              | 1.3900    |
| Cu1  | O3              | 1.951 (2)   | C15  | C16              | 1.3900    |
| Cu2  | N7              | 2.0320 (14) | C16  | C17              | 1.3900    |
| Cu2  | N5              | 2.0453 (15) | C17  | C18              | 1.3900    |
| Cu2  | O1 <sup>2</sup> | 2.273 (2)   | C17  | N6               | 1.408 (3) |
| Cu2  | O1              | 1.985 (2)   | C18  | C19              | 1.3900    |
| Cu2  | N3              | 2.015 (3)   | O1   | C29 <sup>2</sup> | 1.299 (3) |
| N7   | C22             | 1.3900      | O2   | C29              | 1.265 (4) |

**Table S2. Bond Lengths for compound 1**

| Atom | Atom | Length/Å  | Atom | Atom | Length/Å  |
|------|------|-----------|------|------|-----------|
| N7   | C26  | 1.3900    | O3   | C29  | 1.284 (4) |
| C22  | C23  | 1.3900    | N3   | C8   | 1.344 (4) |
| C23  | C24  | 1.3900    | N3   | C12  | 1.353 (4) |
| C24  | C25  | 1.3900    | C9   | C8   | 1.374 (5) |
| C24  | N8   | 1.401 (3) | C9   | C10  | 1.413 (5) |
| C25  | C26  | 1.3900    | C10  | C11  | 1.406 (5) |
| N8   | C28  | 1.450 (5) | C10  | N4   | 1.355 (5) |
| N8   | C27  | 1.454 (5) | C12  | C11  | 1.374 (5) |
| N1   | C5   | 1.3900    | N4   | C14  | 1.455 (5) |
| N1   | C1   | 1.3900    | N4   | C13  | 1.460 (6) |
| C5   | C4   | 1.3900    | N6   | C21  | 1.451 (5) |
| C4   | C3   | 1.3900    | N6   | C20  | 1.444 (5) |
| C3   | C2   | 1.3900    | N2   | C7   | 1.460 (7) |
| C3   | N2   | 1.401 (4) | N2   | C6   | 1.448 (7) |

<sup>1</sup>3-X,-Y,-Z; <sup>2</sup>2-X,-Y,-Z**Table S3. Bond Angles for compound 1**

| Atom            | Atom | Atom            | Angle/°     | Atom             | Atom | Atom             | Angle/°     |
|-----------------|------|-----------------|-------------|------------------|------|------------------|-------------|
| N1              | Cu1  | N1 <sup>1</sup> | 180.0       | C2               | C1   | N1               | 120.0       |
| O3 <sup>1</sup> | Cu1  | N1              | 90.78 (9)   | C15              | N5   | Cu2              | 120.77 (10) |
| O3              | Cu1  | N1 <sup>1</sup> | 90.78 (9)   | C15              | N5   | C19              | 120.0       |
| O3 <sup>1</sup> | Cu1  | N1 <sup>1</sup> | 89.22 (9)   | C19              | N5   | Cu2              | 119.03 (10) |
| O3              | Cu1  | N1              | 89.22 (9)   | C16              | C15  | N5               | 120.0       |
| O3 <sup>1</sup> | Cu1  | O3              | 180.0       | C15              | C16  | C17              | 120.0       |
| N7              | Cu2  | N5              | 172.19 (8)  | C16              | C17  | N6               | 119.64 (19) |
| N7              | Cu2  | O1 <sup>2</sup> | 91.59 (8)   | C18              | C17  | C16              | 120.0       |
| N5              | Cu2  | O1 <sup>2</sup> | 96.22 (8)   | C18              | C17  | N6               | 120.35 (19) |
| O1              | Cu2  | N7              | 89.71 (8)   | C19              | C18  | C17              | 120.0       |
| O1              | Cu2  | N5              | 91.98 (8)   | C18              | C19  | N5               | 120.0       |
| O1              | Cu2  | O1 <sup>2</sup> | 74.52 (8)   | Cu2              | O1   | Cu2 <sup>2</sup> | 105.48 (8)  |
| O1              | Cu2  | N3              | 174.36 (9)  | C29 <sup>2</sup> | O1   | Cu2              | 110.79 (18) |
| N3              | Cu2  | N7              | 90.93 (10)  | C29 <sup>2</sup> | O1   | Cu2 <sup>2</sup> | 143.30 (19) |
| N3              | Cu2  | N5              | 86.65 (10)  | C29              | O3   | Cu1              | 102.32 (17) |
| N3              | Cu2  | O1 <sup>2</sup> | 111.06 (9)  | C8               | N3   | Cu2              | 124.2 (2)   |
| C22             | N7   | Cu2             | 118.55 (10) | C8               | N3   | C12              | 116.1 (3)   |
| C22             | N7   | C26             | 120.0       | C12              | N3   | Cu2              | 119.6 (2)   |
| C26             | N7   | Cu2             | 121.21 (10) | C8               | C9   | C10              | 120.3 (3)   |
| N7              | C22  | C23             | 120.0       | N3               | C8   | C9               | 123.9 (3)   |
| C24             | C23  | C22             | 120.0       | C11              | C10  | C9               | 115.5 (3)   |
| C23             | C24  | N8              | 119.99 (18) | N4               | C10  | C9               | 121.7 (3)   |
| C25             | C24  | C23             | 120.0       | N4               | C10  | C11              | 122.7 (3)   |

**Table S3. Bond Angles for compound 1**

| Atom Atom Atom | Angle/°     | Atom Atom Atom         | Angle/°   |
|----------------|-------------|------------------------|-----------|
| C25 C24 N8     | 119.94 (18) | N3 C12 C11             | 124.0 (3) |
| C24 C25 C26    | 120.0       | C12 C11 C10            | 120.1 (3) |
| C25 C26 N7     | 120.0       | C10 N4 C14             | 121.6 (3) |
| C24 N8 C28     | 120.4 (3)   | C10 N4 C13             | 121.3 (3) |
| C24 N8 C27     | 121.1 (3)   | C14 N4 C13             | 117.1 (3) |
| C28 N8 C27     | 118.0 (3)   | C17 N6 C21             | 120.8 (3) |
| C5 N1 Cu1      | 119.46 (11) | C17 N6 C20             | 120.8 (3) |
| C5 N1 C1       | 120.0       | C20 N6 C21             | 118.1 (3) |
| C1 N1 Cu1      | 120.43 (11) | C3 N2 C7               | 120.4 (4) |
| N1 C5 C4       | 120.0       | C3 N2 C6               | 121.9 (4) |
| C3 C4 C5       | 120.0       | C6 N2 C7               | 117.7 (4) |
| C4 C3 N2       | 119.6 (3)   | O2 C29 O1 <sup>2</sup> | 119.9 (3) |
| C2 C3 C4       | 120.0       | O2 C29 O3              | 122.0 (2) |
| C2 C3 N2       | 120.4 (3)   | O3 C29 O1 <sup>2</sup> | 118.1 (3) |
| C3 C2 C1       | 120.0       |                        |           |

<sup>1</sup>3-X,-Y,-Z; <sup>2</sup>2-X,-Y,-Z**Table S4. Torsion Angles for compound 1**

| A B C D                    | Angle/°     | A B C D         | Angle/°    |
|----------------------------|-------------|-----------------|------------|
| Cu1 N1 C5 C4               | 176.20 (15) | C3 C2 C1 N1     | 0.0        |
| Cu1 N1 C1 C2               | 176.16 (15) | C2 C3 N2 C7     | -175.8 (4) |
| Cu1 O3 C29 O1 <sup>1</sup> | 177.1 (2)   | C2 C3 N2 C6     | 2.3 (6)    |
| Cu1 O3 C29 O2              | -3.6 (3)    | C1 N1 C5 C4     | 0.0        |
| Cu2 N7 C22 C23             | 174.47 (14) | N5 C15 C16 C17  | 0.0        |
| Cu2 N7 C26 C25             | 174.32 (14) | C15 N5 C19 C18  | 0.0        |
| Cu2 N5 C15 C16             | 174.82 (14) | C15 C16 C17 C18 | 0.0        |
| Cu2 N5 C19 C18             | 174.91 (14) | C15 C16 C17 N6  | -179.4 (2) |
| Cu2 N3 C8 C9               | -174.3 (3)  | C16 C17 C18 C19 | 0.0        |
| Cu2 N3 C12 C11             | 175.2 (3)   | C16 C17 N6 C21  | 177.7 (3)  |
| N7 C22 C23 C24             | 0.0         | C16 C17 N6 C20  | 3.8 (5)    |
| C22 N7 C26 C25             | 0.0         | C17 C18 C19 N5  | 0.0        |
| C22 C23 C24 C25            | 0.0         | C18 C17 N6 C21  | -1.7 (4)   |
| C22 C23 C24 N8             | -176.9 (2)  | C18 C17 N6 C20  | -175.6 (3) |
| C23 C24 C25 C26            | 0.0         | C19 N5 C15 C16  | 0.0        |
| C23 C24 N8 C28             | -3.9 (4)    | N3 C12 C11 C10  | -0.5 (6)   |
| C23 C24 N8 C27             | -175.9 (3)  | C9 C10 C11 C12  | 0.4 (5)    |
| C24 C25 C26 N7             | 0.0         | C9 C10 N4 C14   | -178.9 (4) |
| C25 C24 N8 C28             | 179.2 (3)   | C9 C10 N4 C13   | 1.1 (6)    |
| C25 C24 N8 C27             | 7.2 (4)     | C8 N3 C12 C11   | 0.0 (5)    |
| C26 N7 C22 C23             | 0.0         | C8 C9 C10 C11   | 0.2 (5)    |







N0AA - 2.0147 1.520 0.370 0.263 1.285

Bond valence sum = 1.285 : discrepancy = 0.285

Assuming a valence of 2 for Cu1, the atomic BVS contributions are :

| atom | distance | rho   | B     | Bval  | sum   |
|------|----------|-------|-------|-------|-------|
| N1   | - 2.0319 | 1.751 | 0.370 | 0.468 | 0.468 |
| N5   | - 2.0454 | 1.751 | 0.370 | 0.451 | 0.919 |
| O1   | - 1.9848 | 1.679 | 0.360 | 0.428 | 1.347 |
| O1   | - 2.2730 | 1.679 | 0.360 | 0.192 | 1.539 |
| N0AA | - 2.0147 | 1.751 | 0.370 | 0.490 | 2.029 |

Bond valence sum = 2.029 : discrepancy = 0.029

Assuming a valence of 3 for Cu1, the atomic BVS contributions are :

| atom | distance | rho   | B     | Bval  | sum   |
|------|----------|-------|-------|-------|-------|
| N1   | - 2.0319 | 1.768 | 0.370 | 0.490 | 0.490 |
| N5   | - 2.0454 | 1.768 | 0.370 | 0.473 | 0.963 |
| O1   | - 1.9848 | 1.735 | 0.370 | 0.509 | 1.472 |
| O1   | - 2.2730 | 1.735 | 0.370 | 0.234 | 1.705 |
| N0AA | - 2.0147 | 1.768 | 0.370 | 0.513 | 2.219 |

Bond valence sum = 2.219 : discrepancy = 0.781

>>>> The BVS calculations suggest the following central atom valencies :

Cu2 +2 (0.117)      Cu1 +2 (0.029)

#### 4. Retrieved data from SwissADME

**Table S6: Physicochemical data of synthesized aryloxy pyrimidines**

| Molecule    | Code | Canonical SMILES                                         | Formula                                                           | MW     |
|-------------|------|----------------------------------------------------------|-------------------------------------------------------------------|--------|
| Molecule 1  | 3a   | <chem>O=c1cc(Oc2ccccc2)n(c(=O)n1C)C</chem>               | C <sub>12</sub> H <sub>12</sub> N <sub>2</sub> O <sub>3</sub>     | 232.24 |
| Molecule 2  | 3b   | <chem>BrC1ccc(cc1)Oc1cc(=O)n(c(=O)n1C)C</chem>           | C <sub>12</sub> H <sub>11</sub> BrN <sub>2</sub> O <sub>3</sub>   | 311.13 |
| Molecule 3  | 3c   | <chem>O=c1cc(Oc2ccc3c(c2)cccc3)n(c(=O)n1C)C</chem>       | C <sub>16</sub> H <sub>14</sub> N <sub>2</sub> O <sub>3</sub>     | 282.29 |
| Molecule 4  | 3d   | <chem>Cc1ccc(cc1)Oc1cc(=O)n(c(=O)n1C)C</chem>            | C <sub>13</sub> H <sub>14</sub> N <sub>2</sub> O <sub>3</sub>     | 246.26 |
| Molecule 5  | 3e   | <chem>O=Cc1ccc(cc1)Oc1cc(=O)n(c(=O)n1C)C</chem>          | C <sub>13</sub> H <sub>12</sub> N <sub>2</sub> O <sub>4</sub>     | 260.25 |
| Molecule 6  | 3f   | <chem>O=c1cc(Oc2ccc(cc2)[N+](=O)[O-])n(c(=O)n1C)C</chem> | C <sub>12</sub> H <sub>11</sub> N <sub>3</sub> O <sub>5</sub>     | 277.23 |
| Molecule 7  | 3g   | <chem>COc1ccccc1Oc1cc(=O)n(c(=O)n1C)C</chem>             | C <sub>13</sub> H <sub>14</sub> N <sub>2</sub> O <sub>4</sub>     | 262.26 |
| Molecule 8  | 3h   | <chem>O=Cc1ccc(c(c1)OC)Oc1cc(=O)n(c(=O)n1C)C</chem>      | C <sub>14</sub> H <sub>14</sub> N <sub>2</sub> O <sub>5</sub>     | 290.27 |
| Molecule 9  | 3i   | <chem>COc1ccc(cc1)Oc1cc(=O)n(c(=O)n1C)C</chem>           | C <sub>13</sub> H <sub>14</sub> N <sub>2</sub> O <sub>4</sub>     | 262.26 |
| Molecule 10 | 3j   | <chem>Cc1ccccc1Oc1cc(=O)n(c(=O)n1C)C</chem>              | C <sub>13</sub> H <sub>14</sub> N <sub>2</sub> O <sub>3</sub>     | 246.26 |
| Molecule 11 | 3k   | <chem>c1ccc(cc1)Oc1nccn1</chem>                          | C <sub>10</sub> H <sub>8</sub> N <sub>2</sub> O                   | 172.18 |
| Molecule 12 | 3l   | <chem>BrC1ccc(cc1)Oc1nccn1</chem>                        | C <sub>10</sub> H <sub>7</sub> BrN <sub>2</sub> O                 | 251.08 |
| Molecule 13 | 3m   | <chem>O=Cc1ccc(cc1)Oc1nccn1</chem>                       | C <sub>11</sub> H <sub>8</sub> N <sub>2</sub> O <sub>2</sub>      | 200.19 |
| Molecule 14 | 3n   | <chem>c1cnc(nc1)Oc1ccc2c(c1)cccc2</chem>                 | C <sub>14</sub> H <sub>10</sub> N <sub>2</sub> O                  | 222.24 |
| Molecule 15 | 3o   | <chem>Clc1ncnc(c1)Oc1ccccc1</chem>                       | C <sub>10</sub> H <sub>7</sub> ClN <sub>2</sub> O                 | 206.63 |
| Molecule 16 | 3p   | <chem>c1ccc(cc1)Oc1ncnc(c1)Oc1ccccc1</chem>              | C <sub>16</sub> H <sub>12</sub> N <sub>2</sub> O <sub>2</sub>     | 264.28 |
| Molecule 17 | 3q   | <chem>BrC1ccc(cc1)Oc1ncnc(c1)Cl</chem>                   | C <sub>10</sub> H <sub>6</sub> BrClN <sub>2</sub> O               | 285.52 |
| Molecule 18 | 3r   | <chem>Clc1ncnc(c1)Oc1ccc2c(c1)cccc2</chem>               | C <sub>14</sub> H <sub>9</sub> ClN <sub>2</sub> O                 | 256.69 |
| Molecule 19 | 3s   | <chem>O=Cc1ccc(cc1)Oc1ncnc(c1)Cl</chem>                  | C <sub>11</sub> H <sub>7</sub> ClN <sub>2</sub> O <sub>2</sub>    | 234.64 |
| Molecule 20 | 3t   | <chem>CCOC(=O)c1cnc(nc1Oc1ccccc1)SC</chem>               | C <sub>14</sub> H <sub>14</sub> N <sub>2</sub> O <sub>3</sub> S   | 290.34 |
| Molecule 21 | 3u   | <chem>CCOC(=O)c1cnc(nc1Oc1ccc2c(c1)cccc2)SC</chem>       | C <sub>18</sub> H <sub>16</sub> N <sub>2</sub> O <sub>3</sub> S   | 340.4  |
| Molecule 22 | 3v   | <chem>CCOC(=O)c1cnc(nc1Oc1ccc(cc1)Br)SC</chem>           | C <sub>14</sub> H <sub>13</sub> BrN <sub>2</sub> O <sub>3</sub> S | 369.23 |

**Table S7: Physicochemical data of synthesized aryloxy pyrimidines**

| Code | HA | AHA | F-Csp3 | RB | HBA | HBD | MR    | TPSA  |
|------|----|-----|--------|----|-----|-----|-------|-------|
| 3a   | 17 | 12  | 0.17   | 2  | 3   | 0   | 64    | 53.23 |
| 3b   | 18 | 12  | 0.17   | 2  | 3   | 0   | 71.7  | 53.23 |
| 3c   | 21 | 16  | 0.12   | 2  | 3   | 0   | 81.51 | 53.23 |
| 3d   | 18 | 12  | 0.23   | 2  | 3   | 0   | 68.97 | 53.23 |
| 3e   | 19 | 12  | 0.15   | 3  | 4   | 0   | 69.39 | 70.3  |
| 3f   | 20 | 12  | 0.17   | 3  | 5   | 0   | 72.82 | 99.05 |
| 3g   | 19 | 12  | 0.23   | 3  | 4   | 0   | 70.49 | 62.46 |
| 3h   | 21 | 12  | 0.21   | 4  | 5   | 0   | 75.88 | 79.53 |
| 3i   | 19 | 12  | 0.23   | 3  | 4   | 0   | 70.49 | 62.46 |
| 3j   | 18 | 12  | 0.23   | 2  | 3   | 0   | 68.97 | 53.23 |
| 3k   | 13 | 12  | 0      | 2  | 3   | 0   | 48.55 | 35.01 |
| 3l   | 14 | 12  | 0      | 2  | 3   | 0   | 56.25 | 35.01 |
| 3m   | 15 | 12  | 0      | 3  | 4   | 0   | 53.94 | 52.08 |
| 3n   | 17 | 16  | 0      | 2  | 3   | 0   | 66.05 | 35.01 |

|    |    |    |      |   |   |   |       |       |
|----|----|----|------|---|---|---|-------|-------|
| 3o | 14 | 12 | 0    | 2 | 3 | 0 | 53.56 | 35.01 |
| 3p | 20 | 18 | 0    | 4 | 4 | 0 | 75.06 | 44.24 |
| 3q | 15 | 12 | 0    | 2 | 3 | 0 | 61.26 | 35.01 |
| 3r | 18 | 16 | 0    | 2 | 3 | 0 | 71.06 | 35.01 |
| 3s | 16 | 12 | 0    | 3 | 4 | 0 | 58.95 | 52.08 |
| 3t | 20 | 12 | 0.21 | 6 | 5 | 0 | 76.36 | 86.61 |
| 3u | 24 | 16 | 0.17 | 6 | 5 | 0 | 93.86 | 86.61 |
| 3v | 21 | 12 | 0.21 | 6 | 5 | 0 | 84.06 | 86.61 |

**Table S8: Lipophilicity data of aryloxypyrimidines**

| Code | iLOGP | XLOGP3 | WLOGP | MLOGP | Silicos<br>-IT Log P | Consensus<br>Log P |
|------|-------|--------|-------|-------|----------------------|--------------------|
| 3a   | 2.47  | 1.13   | 0.88  | 1.33  | 1.1                  | 1.38               |
| 3b   | 2.86  | 1.82   | 1.64  | 2.01  | 1.77                 | 2.02               |
| 3c   | 2.77  | 2.38   | 2.03  | 2.19  | 2.13                 | 2.3                |
| 3d   | 2.73  | 1.5    | 1.18  | 1.61  | 1.59                 | 1.72               |
| 3e   | 2.17  | 0.59   | 0.69  | 1.12  | 1.29                 | 1.17               |
| 3f   | 2.03  | 0.96   | 0.78  | 0.41  | -1.06                | 0.63               |
| 3g   | 2.65  | 1.1    | 0.88  | 1.47  | 1.13                 | 1.45               |
| 3h   | 2.44  | 0.56   | 0.7   | 0.86  | 1.33                 | 1.18               |
| 3i   | 2.72  | 1.1    | 0.88  | 1.47  | 1.13                 | 1.46               |
| 3j   | 2.59  | 1.5    | 1.18  | 1.61  | 1.59                 | 1.69               |
| 3k   | 2.02  | 2.06   | 2.27  | 1.38  | 2.03                 | 1.95               |
| 3l   | 2.41  | 2.76   | 3.03  | 2.08  | 2.66                 | 2.59               |
| 3m   | 1.81  | 1.53   | 2.08  | 0.74  | 2.14                 | 1.66               |
| 3n   | 2.43  | 3.64   | 3.42  | 2.29  | 3                    | 2.96               |
| 3o   | 2.3   | 3.03   | 2.92  | 1.94  | 2.63                 | 2.56               |
| 3p   | 3.06  | 3.93   | 4.06  | 2.85  | 3.04                 | 3.39               |
| 3q   | 2.73  | 3.72   | 3.68  | 2.63  | 3.28                 | 3.21               |
| 3r   | 2.74  | 4.28   | 4.08  | 2.82  | 3.61                 | 3.5                |
| 3s   | 2.05  | 2.49   | 2.73  | 1.29  | 2.76                 | 2.26               |
| 3t   | 3.04  | 3.13   | 3.17  | 2.08  | 2.81                 | 2.84               |
| 3u   | 3.43  | 4.38   | 4.32  | 2.87  | 3.86                 | 3.77               |
| 3v   | 3.46  | 3.82   | 3.93  | 2.73  | 3.49                 | 3.49               |

**Table S9: Water solubility data of aryloxypyrimidines**

| Code | ESOL  |                       |                       |       | Ali   |                       |                       |       | Silicos-IT |                       |                       |       |
|------|-------|-----------------------|-----------------------|-------|-------|-----------------------|-----------------------|-------|------------|-----------------------|-----------------------|-------|
|      | Log S | Solubility<br>(mg/ml) | Solubility<br>(mol/l) | Class | Log S | Solubility<br>(mg/ml) | Solubility<br>(mol/l) | Class | LogSw      | Solubility<br>(mg/ml) | Solubility<br>(mol/l) | Class |
| 3a   | -2.38 | 9.63E-01              | 4.15E-03              | S     | -1.84 | 3.34E+00              | 1.44E-02              | VS    | -2.86      | 3.24E-01              | 1.39E-03              | S     |
| 3b   | -3.28 | 1.64E-01              | 5.29E-04              | S     | -2.56 | 8.62E-01              | 2.77E-03              | S     | -3.68      | 6.44E-02              | 2.07E-04              | S     |

|    |       |          |          |    |       |          |          |    |       |          |          |    |
|----|-------|----------|----------|----|-------|----------|----------|----|-------|----------|----------|----|
| 3c | -3.52 | 8.50E-02 | 3.01E-04 | S  | -3.14 | 2.05E-01 | 7.27E-04 | S  | -4.52 | 8.53E-03 | 3.02E-05 | MS |
| 3d | -2.67 | 5.23E-01 | 2.12E-03 | S  | -2.23 | 1.46E+00 | 5.95E-03 | S  | -3.24 | 1.41E-01 | 5.73E-04 | S  |
| 3e | -2.09 | 2.09E+00 | 8.04E-03 | S  | -1.64 | 5.97E+00 | 2.29E-02 | VS | -2.8  | 4.12E-01 | 1.58E-03 | S  |
| 3f | -2.41 | 1.08E+00 | 3.89E-03 | S  | -2.63 | 6.54E-01 | 2.36E-03 | S  | -2.23 | 1.64E+00 | 5.93E-03 | S  |
| 3g | -2.43 | 9.78E-01 | 3.73E-03 | S  | -2    | 2.60E+00 | 9.90E-03 | S  | -2.98 | 2.75E-01 | 1.05E-03 | S  |
| 3h | -2.15 | 2.05E+00 | 7.06E-03 | S  | -1.8  | 4.57E+00 | 1.58E-02 | VS | -2.92 | 3.51E-01 | 1.21E-03 | S  |
| 3i | -2.43 | 9.78E-01 | 3.73E-03 | S  | -2    | 2.60E+00 | 9.90E-03 | S  | -2.98 | 2.75E-01 | 1.05E-03 | S  |
| 3j | -2.67 | 5.23E-01 | 2.12E-03 | S  | -2.23 | 1.46E+00 | 5.95E-03 | S  | -3.24 | 1.41E-01 | 5.73E-04 | S  |
| 3k | -2.76 | 3.02E-01 | 1.75E-03 | S  | -2.42 | 6.49E-01 | 3.77E-03 | S  | -3.9  | 2.14E-02 | 1.24E-04 | S  |
| 3l | -3.64 | 5.78E-02 | 2.30E-04 | S  | -3.15 | 1.78E-01 | 7.07E-04 | S  | -4.77 | 4.29E-03 | 1.71E-05 | MS |
| 3m | -2.44 | 7.28E-01 | 3.64E-03 | S  | -2.23 | 1.17E+00 | 5.85E-03 | S  | -3.86 | 2.74E-02 | 1.37E-04 | S  |
| 3n | -4.08 | 1.87E-02 | 8.40E-05 | MS | -4.06 | 1.92E-02 | 8.64E-05 | MS | -5.59 | 5.67E-04 | 2.55E-06 | MS |
| 3o | -3.53 | 6.07E-02 | 2.94E-04 | S  | -3.43 | 7.67E-02 | 3.71E-04 | S  | -4.53 | 6.07E-03 | 2.94E-05 | MS |
| 3p | -4.36 | 1.16E-02 | 4.40E-05 | MS | -4.56 | 7.31E-03 | 2.76E-05 | MS | -6.17 | 1.79E-04 | 6.78E-07 | PS |
| 3q | -4.41 | 1.10E-02 | 3.86E-05 | MS | -4.15 | 2.04E-02 | 7.13E-05 | MS | -5.37 | 1.21E-03 | 4.24E-06 | MS |
| 3r | -4.65 | 5.70E-03 | 2.22E-05 | MS | -4.73 | 4.80E-03 | 1.87E-05 | MS | -6.21 | 1.60E-04 | 6.24E-07 | PS |
| 3s | -3.22 | 1.41E-01 | 6.02E-04 | S  | -3.23 | 1.39E-01 | 5.91E-04 | S  | -4.48 | 7.73E-03 | 3.30E-05 | MS |
| 3t | -3.66 | 6.35E-02 | 2.19E-04 | S  | -4.62 | 7.00E-03 | 2.41E-05 | MS | -4.88 | 3.80E-03 | 1.31E-05 | MS |
| 3u | -4.81 | 5.31E-03 | 1.56E-05 | MS | -5.92 | 4.14E-04 | 1.22E-06 | MS | -6.53 | 1.00E-04 | 2.94E-07 | PS |
| 3v | -4.56 | 1.01E-02 | 2.74E-05 | MS | -5.33 | 1.71E-03 | 4.63E-06 | MS | -5.69 | 7.57E-04 | 2.05E-06 | MS |

**Table S10: Pharmacokinetic properties of aryloxypyrimidines**

| Co de | GI absorp tion | BBB permea nt | Pgp substra te | CYP1A2 inhibitor | CYP2C19 inhibitor | CYP2C9 inhibitor | CYP2D6 inhibitor | CYP3A4 inhibitor | log Kp (cm/s) |
|-------|----------------|---------------|----------------|------------------|-------------------|------------------|------------------|------------------|---------------|
| 3a    | High           | Yes           | No             | Yes              | No                | No               | No               | No               | -6.91         |
| 3b    | High           | Yes           | No             | Yes              | No                | No               | No               | No               | -6.91         |
| 3c    | High           | Yes           | No             | Yes              | Yes               | Yes              | No               | No               | -6.33         |
| 3d    | High           | Yes           | No             | Yes              | No                | No               | No               | No               | -6.74         |
| 3e    | High           | No            | No             | No               | No                | No               | No               | No               | -7.47         |
| 3f    | High           | No            | No             | No               | No                | No               | No               | No               | -7.31         |
| 3g    | High           | Yes           | No             | Yes              | No                | No               | No               | No               | -7.12         |
| 3h    | High           | No            | No             | No               | No                | No               | No               | No               | -7.67         |
| 3i    | High           | Yes           | No             | Yes              | No                | No               | No               | No               | -7.12         |
| 3j    | High           | Yes           | No             | Yes              | No                | No               | No               | No               | -6.74         |
| 3k    | High           | Yes           | No             | Yes              | No                | No               | No               | No               | -5.89         |
| 3l    | High           | Yes           | No             | Yes              | Yes               | No               | No               | No               | -5.87         |
| 3     | High           | Yes           | No             | Yes              | No                | No               | No               | No               | -6.43         |
| 3n    | High           | Yes           | No             | Yes              | Yes               | No               | Yes              | No               | -5.07         |
| 3o    | High           | Yes           | No             | Yes              | Yes               | No               | No               | No               | -5.41         |
| 3p    | High           | Yes           | No             | Yes              | Yes               | Yes              | Yes              | No               | -5.12         |
| 3q    | High           | Yes           | No             | Yes              | Yes               | Yes              | No               | No               | -5.4          |
| 3r    | High           | Yes           | No             | Yes              | Yes               | No               | Yes              | No               | -4.83         |
| 3s    | High           | Yes           | No             | Yes              | Yes               | No               | No               | No               | -5.96         |

|    |      |    |    |     |     |     |    |     |       |
|----|------|----|----|-----|-----|-----|----|-----|-------|
| 3t | High | No | No | Yes | Yes | Yes | No | No  | -5.85 |
| 3u | High | No | No | Yes | Yes | Yes | No | Yes | -5.27 |
| 3v | High | No | No | Yes | Yes | Yes | No | No  | -5.84 |

**Table S11: Druglikeness for synthesized aryloxyprymidines**

| Code | Lipinski violations | Ghose violations | Veber violations | Egan violations | Muegge violations | Bioavailability Score | PAINS alerts | Brenk alerts | Leadlikeness violations | Synthetic Accessibility |
|------|---------------------|------------------|------------------|-----------------|-------------------|-----------------------|--------------|--------------|-------------------------|-------------------------|
| 3a   | 0                   | 0                | 0                | 0               | 0                 | 0.55                  | 0            | 0            | 1                       | 2.45                    |
| 3b   | 0                   | 0                | 0                | 0               | 0                 | 0.55                  | 0            | 0            | 0                       | 2.5                     |
| 3c   | 0                   | 0                | 0                | 0               | 0                 | 0.55                  | 0            | 0            | 0                       | 2.66                    |
| 3d   | 0                   | 0                | 0                | 0               | 0                 | 0.55                  | 0            | 0            | 1                       | 2.47                    |
| 3e   | 0                   | 0                | 0                | 0               | 0                 | 0.55                  | 0            | 1            | 0                       | 2.41                    |
| 3f   | 0                   | 0                | 0                | 0               | 0                 | 0.55                  | 0            | 2            | 0                       | 2.57                    |
| 3g   | 0                   | 0                | 0                | 0               | 0                 | 0.55                  | 0            | 0            | 0                       | 2.56                    |
| 3h   | 0                   | 0                | 0                | 0               | 0                 | 0.55                  | 0            | 1            | 0                       | 2.6                     |
| 3i   | 0                   | 0                | 0                | 0               | 0                 | 0.55                  | 0            | 0            | 0                       | 2.59                    |
| 3j   | 0                   | 0                | 0                | 0               | 0                 | 0.55                  | 0            | 0            | 1                       | 2.52                    |
| 3k   | 0                   | 0                | 0                | 0               | 1                 | 0.55                  | 0            | 0            | 1                       | 1.74                    |
| 3l   | 0                   | 0                | 0                | 0               | 0                 | 0.55                  | 0            | 0            | 0                       | 1.87                    |
| 3m   | 0                   | 0                | 0                | 0               | 0                 | 0.55                  | 0            | 1            | 1                       | 1.63                    |
| 3n   | 0                   | 0                | 0                | 0               | 0                 | 0.55                  | 0            | 0            | 2                       | 1.95                    |
| 3o   | 0                   | 0                | 0                | 0               | 0                 | 0.55                  | 0            | 0            | 1                       | 2.06                    |
| 3p   | 0                   | 0                | 0                | 0               | 0                 | 0.55                  | 0            | 0            | 1                       | 2.32                    |
| 3q   | 0                   | 0                | 0                | 0               | 0                 | 0.55                  | 0            | 0            | 1                       | 2.14                    |
| 3r   | 0                   | 0                | 0                | 0               | 0                 | 0.55                  | 0            | 0            | 1                       | 2.26                    |
| 3s   | 0                   | 0                | 0                | 0               | 0                 | 0.55                  | 0            | 1            | 1                       | 1.94                    |
| 3t   | 0                   | 0                | 0                | 0               | 0                 | 0.55                  | 0            | 0            | 0                       | 2.56                    |
| 3u   | 0                   | 0                | 0                | 0               | 0                 | 0.55                  | 0            | 0            | 1                       | 2.77                    |
| 3v   | 0                   | 0                | 0                | 0               | 0                 | 0.55                  | 0            | 0            | 2                       | 2.61                    |

**Table S12: Physicochemical properties of arylthiopyrimidines**

| Molecule   | Code | Canonical SMILES                                 | Formula                                                           | MW     |
|------------|------|--------------------------------------------------|-------------------------------------------------------------------|--------|
| Molecule 1 | 3w   | <chem>O=c1cc(Sc2ccccc2)n(c(=O)n1C)C</chem>       | C <sub>12</sub> H <sub>12</sub> N <sub>2</sub> O <sub>2</sub> S   | 248.3  |
| Molecule 2 | 3x   | <chem>Clc1ccc(cc1)Sc1cc(=O)n(c(=O)n1C)C</chem>   | C <sub>12</sub> H <sub>11</sub> ClN <sub>2</sub> O <sub>2</sub> S | 282.75 |
| Molecule 3 | 3y   | <chem>Brc1ccc(cc1)Sc1cc(=O)n(c(=O)n1C)C</chem>   | C <sub>12</sub> H <sub>11</sub> BrN <sub>2</sub> O <sub>2</sub> S | 327.2  |
| Molecule 4 | 3z   | <chem>COc1ccccc1Sc1cc(=O)n(c(=O)n1C)C</chem>     | C <sub>13</sub> H <sub>14</sub> N <sub>2</sub> O <sub>3</sub> S   | 278.33 |
| Molecule 5 | 3aa  | <chem>Cc1ccc(c(c1)C)Sc1cc(=O)n(c(=O)n1C)C</chem> | C <sub>14</sub> H <sub>16</sub> N <sub>2</sub> O <sub>2</sub> S   | 276.35 |

|            |     |                                               |                                                                 |        |
|------------|-----|-----------------------------------------------|-----------------------------------------------------------------|--------|
| Molecule 6 | 3ab | <chem>Nc1ccc(cc1)Sc1cc(=O)n(c(=O)n1C)C</chem> | C <sub>12</sub> H <sub>13</sub> N <sub>3</sub> O <sub>2</sub> S | 263.32 |
|------------|-----|-----------------------------------------------|-----------------------------------------------------------------|--------|

**Table S13: Physicochemical properties of arylthiopyrimidines**

| Code | HA | AHA | F-Csp3 | RB | HBA | HBD | MR    | TPSA  |
|------|----|-----|--------|----|-----|-----|-------|-------|
| 3w   | 17 | 12  | 0.17   | 2  | 2   | 0   | 68.05 | 69.3  |
| 3x   | 18 | 12  | 0.17   | 2  | 2   | 0   | 73.06 | 69.3  |
| 3y   | 18 | 12  | 0.17   | 2  | 2   | 0   | 75.75 | 69.3  |
| 3z   | 19 | 12  | 0.23   | 3  | 3   | 0   | 74.54 | 78.53 |
| 3aa  | 19 | 12  | 0.29   | 2  | 2   | 0   | 77.98 | 69.3  |
| 3ab  | 18 | 12  | 0.17   | 2  | 2   | 1   | 72.46 | 95.32 |

**Table S14: Lipophilicity data of arylthiopyrimidines**

| Code | iLOGP | XLOGP3 | WLOGP | MLOGP | Silicos<br>-IT Log P | Consensus<br>Log P |
|------|-------|--------|-------|-------|----------------------|--------------------|
| 3w   | 2.47  | 1.67   | 1.24  | 2.16  | 1.66                 | 1.84               |
| 3x   | 2.67  | 2.3    | 1.89  | 2.7   | 2.3                  | 2.37               |
| 3y   | 2.79  | 2.36   | 2     | 2.84  | 2.33                 | 2.46               |
| 3z   | 2.71  | 1.64   | 1.24  | 1.87  | 1.69                 | 1.83               |
| 3aa  | 2.94  | 2.4    | 1.85  | 2.7   | 2.65                 | 2.51               |
| 3ab  | 2.1   | 0.99   | 0.83  | 1.6   | 0.94                 | 1.29               |

**Table S15: Water solubility data of arylthiopyrimidines**

| Code | ESOL  |                    |                    |       | Ali   |                    |                    |       | Silicos-IT |                    |                    |       |
|------|-------|--------------------|--------------------|-------|-------|--------------------|--------------------|-------|------------|--------------------|--------------------|-------|
|      | Log S | Solubility (mg/ml) | Solubility (mol/l) | Class | Log S | Solubility (mg/ml) | Solubility (mol/l) | Class | LogSw      | Solubility (mg/ml) | Solubility (mol/l) | Class |
| 3w   | -2.82 | 3.74E-01           | 1.51E-03           | S     | -2.74 | 4.52E-01           | 1.82E-03           | S     | -3.22      | 1.48E-01           | 5.97E-04           | S     |
| 3x   | -3.4  | 1.12E-01           | 3.95E-04           | S     | -3.39 | 1.14E-01           | 4.04E-04           | S     | -3.83      | 4.17E-02           | 1.48E-04           | S     |
| 3y   | -3.72 | 6.28E-02           | 1.92E-04           | S     | -3.46 | 1.15E-01           | 3.50E-04           | S     | -4.05      | 2.94E-02           | 8.99E-05           | MS    |
| 3z   | -2.87 | 3.77E-01           | 1.35E-03           | S     | -2.9  | 3.49E-01           | 1.25E-03           | S     | -3.34      | 1.26E-01           | 4.53E-04           | S     |
| 3aa  | -3.4  | 1.10E-01           | 3.97E-04           | S     | -3.5  | 8.80E-02           | 3.18E-04           | S     | -3.99      | 2.81E-02           | 1.02E-04           | S     |
| 3ab  | -2.46 | 9.18E-01           | 3.49E-03           | S     | -2.58 | 6.92E-01           | 2.63E-03           | S     | -2.86      | 3.62E-01           | 1.37E-03           | S     |



**Table S16: Pharmacokinetic properties of arylthiopyrimidines**

| Code | GI absorption | BBB permeant | Pgp substrate | CYP1A2 inhibitor | CYP2C19 inhibitor | CYP2C9 inhibitor | CYP2D6 inhibitor | CYP3A4 inhibitor | log Kp (cm/s) |
|------|---------------|--------------|---------------|------------------|-------------------|------------------|------------------|------------------|---------------|
| 3w   | High          | No           | No            | Yes              | No                | No               | No               | No               | -6.63         |
| 3x   | High          | Yes          | No            | Yes              | Yes               | Yes              | No               | No               | -6.39         |
| 3y   | High          | Yes          | No            | Yes              | Yes               | Yes              | No               | No               | -6.62         |
| 3z   | High          | No           | No            | Yes              | No                | No               | No               | No               | -6.83         |
| 3aa  | High          | Yes          | No            | Yes              | Yes               | Yes              | No               | No               | -6.28         |
| 3ab  | High          | No           | No            | Yes              | No                | No               | No               | No               | -7.2          |

**Table S17: Druglikeness for synthesized arylthiopyrimidines**

| Code | Lipinski violations | Ghose violations | Veber violations | Egan violations | Muegge violations | Bioavailability Score | PAINS alerts | Brenk alerts | Leadlikeness violations | Synthetic Accessibility |
|------|---------------------|------------------|------------------|-----------------|-------------------|-----------------------|--------------|--------------|-------------------------|-------------------------|
| 3w   | 0                   | 0                | 0                | 0               | 0                 | 0.55                  | 0            | 0            | 1                       | 2.31                    |
| 3x   | 0                   | 0                | 0                | 0               | 0                 | 0.55                  | 0            | 0            | 0                       | 2.34                    |
| 3y   | 0                   | 0                | 0                | 0               | 0                 | 0.55                  | 0            | 0            | 0                       | 2.37                    |
| 3z   | 0                   | 0                | 0                | 0               | 0                 | 0.55                  | 0            | 0            | 0                       | 2.64                    |
| 3aa  | 0                   | 0                | 0                | 0               | 0                 | 0.55                  | 0            | 0            | 0                       | 2.53                    |
| 3ab  | 0                   | 0                | 0                | 0               | 0                 | 0.55                  | 0            | 1            | 0                       | 2.36                    |

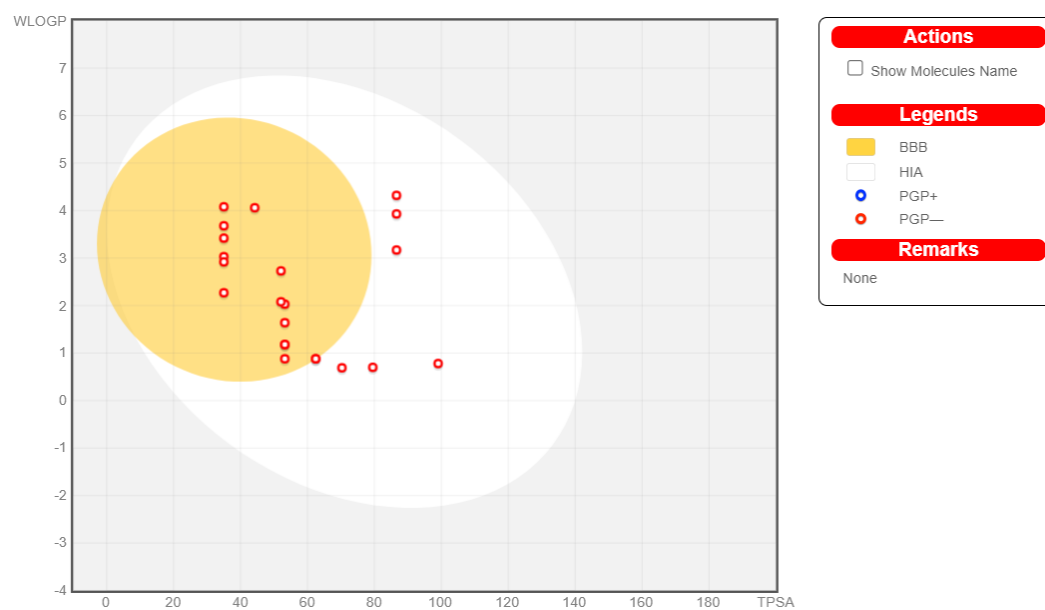

**Fig. S76: BOILED-Egg model of arylthiopyrimidines**

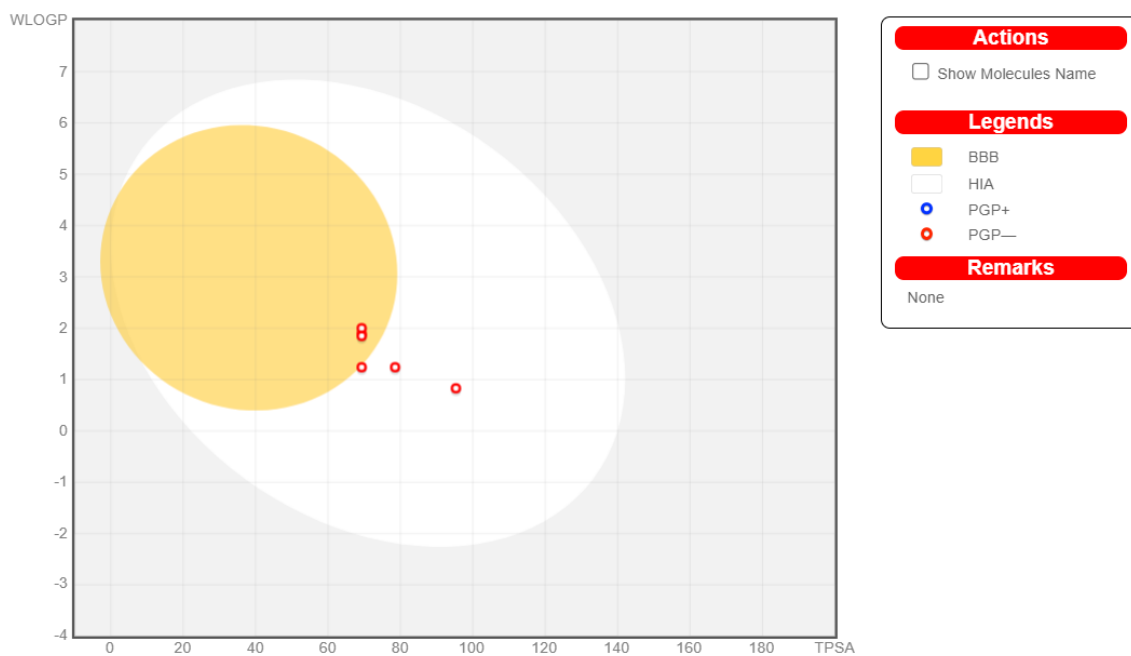

**Fig. S77:** BOILED-Egg model of arylthiopyrimidines
